# Supplementary material for: Bone Marrow Harbors a Unique Population of Dendritic Cells with the Potential to Boost Neutrophil Formation upon Exposure to Fungal Antigen
Source: Cells. 2021 Dec 24;11(1):55. doi: 10.3390/cells11010055 (PMC8750392; doi:10.3390/cells11010055)
Supplement: Supplementary file 1 [file cells-11-00055-s001.zip › Supplemental Table 1 Gene expression data DC BM vs spleen.xlsx]

## Sheet: topTable_DC_BMvsSpl_1.5FC
Ensembl	Symbol	logFC	AveExpr	t	P.Value	adj.P.Val
ENSMUSG00000024442	0610009O20Rik	-0.772663	4.79045	-6.01294	0.000610382	0.00329121
ENSMUSG00000042208	0610010F05Rik	0.986116	4.28829	4.64743	0.00257179	0.00996945
ENSMUSG00000060512	0610040J01Rik	2.57914	2.22026	5.92473	0.000665041	0.0035021
ENSMUSG00000037960	1110007C09Rik	0.64416	4.42384	3.74138	0.0077196	0.023089
ENSMUSG00000046999	1110032F04Rik	-3.76201	1.86833	-7.10814	0.000225945	0.00154469
ENSMUSG00000092203	1110038B12Rik	1.62806	3.33685	7.13875	0.000220141	0.00152269
ENSMUSG00000035171	1110059E24Rik	0.687756	3.7821	3.16117	0.0166436	0.0422231
ENSMUSG00000097290	1300002E11Rik	-1.15627	2.72717	-3.904	0.00628009	0.0196251
ENSMUSG00000074578	1500012F01Rik	0.845107	5.34867	7.06072	0.000235283	0.00158755
ENSMUSG00000101585	1600010M07Rik	-1.36795	5.068	-8.8333	5.90526e-05	0.000562174
ENSMUSG00000054676	1600014C10Rik	0.726477	5.66277	6.8719	0.000277043	0.00180343
ENSMUSG00000097048	1600020E01Rik	-0.760655	3.53266	-3.7078	0.00805967	0.0239145
ENSMUSG00000030030	1700003E16Rik	-2.76338	0.848526	-4.97884	0.00177298	0.00752992
ENSMUSG00000058925	1700011I03Rik	-4.34045	-0.462448	-3.00613	0.0206006	0.0499283
ENSMUSG00000032300	1700017B05Rik	0.876446	5.00228	4.3678	0.0035635	0.0127227
ENSMUSG00000019797	1700021F05Rik	1.21417	2.52569	4.02022	0.0054322	0.0175437
ENSMUSG00000032666	1700025G04Rik	0.827817	6.35726	4.22046	0.00425139	0.0145749
ENSMUSG00000027327	1700037H04Rik	1.63347	2.96546	5.5893	0.000929377	0.00455458
ENSMUSG00000063458	1700112E06Rik	2.20891	1.07726	4.41148	0.00338393	0.0122473
ENSMUSG00000098496	1810026B05Rik	-1.82453	1.56758	-4.41529	0.00336876	0.0122102
ENSMUSG00000021458	2010111I01Rik	0.936463	2.59796	3.32936	0.0132543	0.0352431
ENSMUSG00000083844	2210015D19Rik	0.867949	3.02675	3.37807	0.0124177	0.0335145
ENSMUSG00000029559	2210016L21Rik	-0.688798	4.59858	-4.54802	0.00288417	0.0108612
ENSMUSG00000049643	2310022A10Rik	1.03154	4.80875	5.31513	0.00123463	0.00571473
ENSMUSG00000031983	2310022B05Rik	1.30207	3.57645	3.69509	0.00819257	0.02423
ENSMUSG00000087590	2410004N09Rik	1.1761	3.05526	4.67496	0.00249206	0.00970695
ENSMUSG00000046791	2410016O06Rik	0.744767	3.34631	3.34211	0.0130296	0.0347959
ENSMUSG00000032840	2410131K14Rik	-0.65446	4.46481	-3.90851	0.00624461	0.0195378
ENSMUSG00000071632	2510002D24Rik	-0.931812	3.20907	-3.76907	0.0074509	0.0224916
ENSMUSG00000036955	2510003E04Rik	-0.63691	4.69915	-4.92142	0.00188889	0.00789639
ENSMUSG00000031242	2610002M06Rik	0.77058	4.56932	5.6797	0.00084807	0.00422988
ENSMUSG00000039043	2610034B18Rik	-2.08873	3.28023	-8.95086	5.43404e-05	0.000524993
ENSMUSG00000079671	2610203C22Rik	6.49716	-2.69042	3.58305	0.0094737	0.0271205
ENSMUSG00000096001	2610528A11Rik	-2.03552	1.09454	-3.90966	0.00623561	0.0195238
ENSMUSG00000053080	2700081O15Rik	-1.13668	2.36311	-3.57043	0.00963107	0.0274615
ENSMUSG00000062198	2700097O09Rik	-1.05362	2.70527	-3.82744	0.00691746	0.0211816
ENSMUSG00000018570	2810408A11Rik	-3.35539	0.161295	-3.66819	0.00848192	0.0248988
ENSMUSG00000040204	2810417H13Rik	-0.982359	4.97452	-7.63537	0.000146067	0.00111869
ENSMUSG00000097709	2810429I04Rik	-3.25107	0.178336	-3.94262	0.00598325	0.0188846
ENSMUSG00000051339	2900026A02Rik	-4.41522	4.35707	-18.1115	5.54739e-07	2.676e-05
ENSMUSG00000099696	2900052N01Rik	-9.58424	0.581977	-9.67711	3.3169e-05	0.000369981
ENSMUSG00000028300	3110043O21Rik	0.6535	5.34134	5.64556	0.000877807	0.00434967
ENSMUSG00000035868	3110052M02Rik	-0.959118	2.79175	-3.2099	0.0155748	0.0400779
ENSMUSG00000053553	3110082I17Rik	2.0349	3.27543	7.42792	0.0001729	0.00127948
ENSMUSG00000074024	4632427E13Rik	-1.03177	2.8555	-3.51796	0.0103168	0.0289068
ENSMUSG00000020101	4632428N05Rik	1.56072	8.80307	25.7754	5.26105e-08	6.80148e-06
ENSMUSG00000097236	4831440E17Rik	-5.50281	-1.90781	-3.56817	0.00965963	0.0275126
ENSMUSG00000097779	4833407H14Rik	-1.61309	5.17647	-9.17689	4.64325e-05	0.000467144
ENSMUSG00000085287	4833418N02Rik	-1.27266	2.04129	-3.53743	0.0100563	0.028382
ENSMUSG00000069873	4930438A08Rik	6.7818	-2.5481	3.92708	0.00610077	0.019162
ENSMUSG00000090394	4930523C07Rik	-0.941271	5.39381	-8.52861	7.35859e-05	0.000667467
ENSMUSG00000085084	4930570G19Rik	4.21178	-0.643221	3.1823	0.0161709	0.0412666
ENSMUSG00000074146	4930579C12Rik	-5.43487	-0.735764	-4.14975	0.00463253	0.0155315
ENSMUSG00000070315	4930581F22Rik	-1.73061	4.49638	-11.9602	8.49694e-06	0.000138001
ENSMUSG00000031938	4931406C07Rik	1.63886	4.72719	9.3926	4.00858e-05	0.00042339
ENSMUSG00000074580	4931440P22Rik	1.02706	2.13276	3.10539	0.0179647	0.0448009
ENSMUSG00000087289	4933424M12Rik	-2.26119	2.21639	-5.71655	0.000817243	0.00410782
ENSMUSG00000072893	4933439C10Rik	-1.29737	2.68666	-4.61198	0.00267865	0.0102667
ENSMUSG00000034959	5031414D18Rik	-0.788668	6.72958	-3.86469	0.00659888	0.020414
ENSMUSG00000097885	5031434O11Rik	-1.82671	2.06757	-5.3341	0.00121022	0.00563405
ENSMUSG00000052688	5430435G22Rik	6.11619	3.30946	8.71098	6.4455e-05	0.000602834
ENSMUSG00000041605	5730559C18Rik	-6.55278	-1.53138	-5.18791	0.00141324	0.00633506
ENSMUSG00000097636	5830416P10Rik	-1.70022	5.564	-10.1465	2.4523e-05	0.000299798
ENSMUSG00000074733	5830428H23Rik	-0.706072	4.6777	-4.90958	0.00191384	0.00797877
ENSMUSG00000097471	5830432E09Rik	1.47089	3.48942	6.61257	0.000348757	0.00213988
ENSMUSG00000022195	6030458C11Rik	-0.608777	5.59377	-6.1182	0.000551659	0.0030491
ENSMUSG00000025573	6030468B19Rik	-1.69668	1.49579	-3.59642	0.00930986	0.026764
ENSMUSG00000075585	6330403L08Rik	4.42162	-0.607687	3.61494	0.0090882	0.0262846
ENSMUSG00000031824	6430548M08Rik	1.93056	6.40778	22.4976	1.30754e-07	1.15161e-05
ENSMUSG00000030207	8430419L09Rik	-2.0141	6.51457	-18.6368	4.58753e-07	2.3723e-05
ENSMUSG00000097736	9530059O14Rik	-6.77443	-2.03944	-4.46427	0.00318016	0.0116865
ENSMUSG00000038028	9630033F20Rik	-0.717685	3.46632	-3.4269	0.011636	0.0317838
ENSMUSG00000097944	A130014A01Rik	1.55934	1.95473	3.99688	0.00559185	0.0179428
ENSMUSG00000038884	A230050P20Rik	-0.905829	3.64414	-4.13488	0.00471739	0.0157602
ENSMUSG00000074497	A430078G23Rik	0.689677	4.01545	3.96361	0.00582835	0.0185129
ENSMUSG00000052760	A630001G21Rik	0.621345	5.41247	4.42997	0.00331094	0.0120676
ENSMUSG00000021482	Aaed1	1.00291	3.47361	5.01311	0.00170758	0.00731947
ENSMUSG00000025375	Aatk	3.43099	1.87049	9.45304	3.84887e-05	0.000412931
ENSMUSG00000057191	AB124611	2.1948	6.63006	26.8628	3.98801e-08	5.9261e-06
ENSMUSG00000015243	Abca1	4.12289	5.08871	13.2158	4.43347e-06	9.09776e-05
ENSMUSG00000018800	Abca5	-4.4165	1.49761	-10.5074	1.9604e-05	0.000253948
ENSMUSG00000044749	Abca6	2.71889	3.10871	7.46071	0.000168309	0.00125412
ENSMUSG00000041797	Abca9	3.17569	7.5082	22.4977	1.30747e-07	1.15161e-05
ENSMUSG00000040584	Abcb1a	-4.51879	5.27105	-9.16839	4.67052e-05	0.000468793
ENSMUSG00000028970	Abcb1b	0.783829	5.26446	4.05103	0.00522907	0.0170754
ENSMUSG00000042476	Abcb4	2.05133	2.38154	4.3434	0.00366837	0.013018
ENSMUSG00000032849	Abcc4	0.726816	5.27895	5.00756	0.00171799	0.00734948
ENSMUSG00000022822	Abcc5	1.91666	5.77573	6.34625	0.000445001	0.00257981
ENSMUSG00000055782	Abcd2	3.83496	4.04805	19.4123	3.4978e-07	1.98718e-05
ENSMUSG00000024030	Abcg1	0.918901	7.75028	11.5141	1.08712e-05	0.000163995
ENSMUSG00000040532	Abhd11	1.11941	3.37993	5.34207	0.00120013	0.00559714
ENSMUSG00000032046	Abhd12	0.610895	7.77322	7.09675	0.00022815	0.00155648
ENSMUSG00000042210	Abhd14a	6.93708	-2.47046	4.13815	0.00469861	0.0157082
ENSMUSG00000032540	Abhd5	1.1923	3.93258	6.52885	0.000376218	0.0022669
ENSMUSG00000025277	Abhd6	-2.41032	3.3091	-10.1442	2.4558e-05	0.000299798
ENSMUSG00000018381	Abi3	0.664573	5.33377	3.42226	0.0117079	0.0319446
ENSMUSG00000026842	Abl1	-0.780828	7.99292	-9.9885	2.71089e-05	0.000321821
ENSMUSG00000025085	Ablim1	1.42809	1.83571	3.73318	0.00780113	0.0232971
ENSMUSG00000030083	Abtb1	0.672347	4.95737	4.19626	0.00437778	0.0149094
ENSMUSG00000032724	Abtb2	1.34546	2.46439	4.17322	0.00450201	0.0152361
ENSMUSG00000036880	Acaa2	1.06888	4.94762	6.50109	0.000385857	0.0023105
ENSMUSG00000027710	Acad9	-0.633713	5.29687	-4.23673	0.00416866	0.0143522
ENSMUSG00000029545	Acads	1.08837	4.85065	8.2916	8.77317e-05	0.000755627
ENSMUSG00000001588	Acap1	-3.64405	6.16195	-33.2602	9.49644e-09	3.08357e-06
ENSMUSG00000040272	Accs	1.78789	3.83744	7.34227	0.000185575	0.00135162
ENSMUSG00000020681	Ace	3.80737	7.26804	14.6916	2.21371e-06	5.80504e-05
ENSMUSG00000030760	Acer3	1.36043	6.40853	15.4851	1.56529e-06	4.84634e-05
ENSMUSG00000037872	Ackr1	-3.90034	2.41539	-10.109	2.51096e-05	0.000304804
ENSMUSG00000028937	Acot7	-1.85152	6.28895	-19.5969	3.2841e-07	1.90389e-05
ENSMUSG00000025287	Acot9	0.911625	4.50636	6.60966	0.000349672	0.00214346
ENSMUSG00000002103	Acp2	1.51232	6.95808	9.35172	4.12087e-05	0.000431723
ENSMUSG00000001348	Acp5	0.620062	8.04107	5.20252	0.00139132	0.00626723
ENSMUSG00000032561	Acpp	6.05167	-1.44298	3.8979	0.00632839	0.0197426
ENSMUSG00000032883	Acsl3	1.63301	3.05199	6.2019	0.000509486	0.002865
ENSMUSG00000027452	Acss1	1.27004	6.58788	14.8817	2.03407e-06	5.59606e-05
ENSMUSG00000015143	Actn1	-2.09596	7.03568	-14.9876	1.94128e-06	5.47429e-05
ENSMUSG00000037351	Actr1b	-1.90938	6.84946	-20.259	2.63198e-07	1.67038e-05
ENSMUSG00000026836	Acvr1	1.06121	4.1282	5.46638	0.00105432	0.00502963
ENSMUSG00000000530	Acvrl1	2.17687	5.49971	16.1025	1.20906e-06	4.13512e-05
ENSMUSG00000054693	Adam10	0.654258	7.66749	8.53456	7.3266e-05	0.000665815
ENSMUSG00000020926	Adam11	-4.64364	6.04247	-25.1085	6.27135e-08	7.61381e-06
ENSMUSG00000028041	Adam15	3.18839	5.25824	18.8138	4.30812e-07	2.2648e-05
ENSMUSG00000052593	Adam17	0.900148	8.16986	7.83975	0.000124154	0.000984604
ENSMUSG00000011256	Adam19	-2.46752	6.37109	-14.7144	2.1913e-06	5.76797e-05
ENSMUSG00000040537	Adam22	-1.94236	5.94589	-16.7392	9.3546e-07	3.62085e-05
ENSMUSG00000025964	Adam23	-6.69981	6.50371	-67.1234	8.34183e-11	1.07843e-06
ENSMUSG00000027318	Adam33	6.1345	-1.13736	4.08018	0.00504458	0.0166283
ENSMUSG00000025473	Adam8	-2.21909	7.58334	-33.5554	8.94846e-09	3.04436e-06
ENSMUSG00000031555	Adam9	0.945512	6.28808	10.1091	2.51094e-05	0.000304804
ENSMUSG00000022057	Adamdec1	-1.80595	3.25424	-6.28579	0.000470822	0.00269924
ENSMUSG00000014852	Adamts13	-4.45102	1.51475	-10.1897	2.38661e-05	0.000293568
ENSMUSG00000015850	Adamtsl4	2.1486	3.14523	6.40221	0.000422523	0.00246832
ENSMUSG00000020709	Adap2	2.21575	5.76624	14.846	2.06647e-06	5.61247e-05
ENSMUSG00000086507	Adap2os	2.16173	1.81194	4.24793	0.00411277	0.0142241
ENSMUSG00000003762	Adck4	0.605545	4.21253	3.37412	0.0124833	0.0336427
ENSMUSG00000022220	Adcy4	2.75917	1.72628	6.7536	0.000307458	0.00193422
ENSMUSG00000022994	Adcy6	-1.37446	5.14487	-9.73235	3.19895e-05	0.000360558
ENSMUSG00000005580	Adcy9	2.70638	2.00654	6.15792	0.000531172	0.00296119
ENSMUSG00000026457	Adipor1	0.971524	7.48023	13.1816	4.50926e-06	9.19334e-05
ENSMUSG00000030790	Adm	-3.90664	-0.228757	-4.26174	0.00404492	0.0140352
ENSMUSG00000025236	Adpgk	0.739074	5.62047	6.83618	0.000285854	0.00184315
ENSMUSG00000045730	Adrb2	1.34444	4.57673	6.77672	0.000301228	0.0019099
ENSMUSG00000011148	Adssl1	3.47969	4.71876	16.5561	1.00611e-06	3.73765e-05
ENSMUSG00000030232	Aebp2	-1.40383	8.13125	-18.7726	4.37139e-07	2.28799e-05
ENSMUSG00000044811	AF251705	1.1429	7.60984	17.3055	7.50397e-07	3.25159e-05
ENSMUSG00000025422	Agap2	-1.28658	6.05418	-14.1131	2.88274e-06	6.90148e-05
ENSMUSG00000029165	Agbl5	-0.897459	3.31865	-3.98962	0.00564254	0.0180562
ENSMUSG00000015452	Ager	-1.45995	2.24626	-4.26069	0.00405007	0.0140387
ENSMUSG00000026922	Agpat2	3.0891	2.8406	10.9318	1.51987e-05	0.000210598
ENSMUSG00000023827	Agpat4	0.617734	5.54926	6.07087	0.000577238	0.00316123
ENSMUSG00000031467	Agpat5	0.913415	4.62565	3.93296	0.00605603	0.0190585
ENSMUSG00000029007	Agtrap	0.861882	5.33905	7.39745	0.000177294	0.00130676
ENSMUSG00000037692	Ahdc1	0.728945	3.57531	3.55592	0.00981568	0.027865
ENSMUSG00000069833	Ahnak	5.58753	6.93267	30.6063	1.66098e-08	3.70226e-06
ENSMUSG00000072812	Ahnak2	6.85864	-2.50968	3.99095	0.00563318	0.0180452
ENSMUSG00000019256	Ahr	-1.52274	5.62304	-15.2492	1.73203e-06	5.10062e-05
ENSMUSG00000021575	Ahrr	-1.24169	3.48492	-6.20343	0.000508746	0.00286287
ENSMUSG00000056145	AI504432	1.17364	5.52037	11.6224	1.02316e-05	0.00015707
ENSMUSG00000074873	AI606181	-1.15778	3.31539	-5.13473	0.0014963	0.00662188
ENSMUSG00000073490	AI607873	1.6066	7.42864	9.46498	3.81819e-05	0.000410662
ENSMUSG00000087107	AI662270	0.703641	6.78579	9.40577	3.97314e-05	0.000421866
ENSMUSG00000024397	Aif1	3.3761	5.9703	26.754	4.09802e-08	6.02036e-06
ENSMUSG00000037860	Aim2	-0.716055	6.93084	-5.50561	0.00101252	0.00485888
ENSMUSG00000000731	Aire	-5.94862	0.698763	-9.04708	5.08005e-05	0.000497914
ENSMUSG00000018428	Akap1	1.46419	2.71935	4.71287	0.00238672	0.00941864
ENSMUSG00000066406	Akap13	-0.619878	9.25833	-9.82081	3.01988e-05	0.000345941
ENSMUSG00000021057	Akap5	-2.41733	1.21795	-4.47816	0.00312881	0.0115503
ENSMUSG00000028692	Akr1a1	0.986207	8.63427	16.1455	1.18794e-06	4.08472e-05
ENSMUSG00000061758	Akr1b10	1.70595	3.99473	6.92466	0.000264586	0.00174526
ENSMUSG00000029762	Akr1b8	6.69018	-2.59391	3.79666	0.00719334	0.0218299
ENSMUSG00000021213	Akr1c13	1.99808	2.14658	6.1129	0.000554462	0.00306067
ENSMUSG00000028743	Akr7a5	-1.27508	5.04901	-10.8117	1.63192e-05	0.000222193
ENSMUSG00000103515	AL591003.1	-0.808449	3.84947	-4.54054	0.0029093	0.0109272
ENSMUSG00000032786	Alas1	0.640225	5.99362	5.86664	0.000704039	0.00365682
ENSMUSG00000013584	Aldh1a2	1.32636	4.08413	3.81075	0.00706556	0.0215281
ENSMUSG00000029455	Aldh2	1.87421	7.59854	22.4831	1.31319e-07	1.15161e-05
ENSMUSG00000024885	Aldh3b1	3.45232	4.8286	14.4828	2.43232e-06	6.23378e-05
ENSMUSG00000026687	Aldh9a1	1.10427	6.56387	13.6444	3.5977e-06	8.01295e-05
ENSMUSG00000030695	Aldoa	1.35522	7.75646	11.3429	1.19773e-05	0.000175359
ENSMUSG00000059343	Aldoart1	1.0575	2.32877	3.20492	0.0156805	0.0402937
ENSMUSG00000017390	Aldoc	2.47423	2.23796	6.70355	0.000321448	0.00200661
ENSMUSG00000041718	Alg13	0.871519	3.98789	5.21105	0.00137871	0.00622998
ENSMUSG00000036632	Alg5	0.635117	4.99652	4.71754	0.00237409	0.00938953
ENSMUSG00000032059	Alg9	0.593336	4.51476	4.1258	0.00477007	0.0158889
ENSMUSG00000025701	Alox5	4.31526	1.44712	9.10614	4.87576e-05	0.000484503
ENSMUSG00000032845	Alpk2	-3.78677	1.16365	-5.10994	0.00153688	0.00676501
ENSMUSG00000044037	Als2cl	-1.35586	4.92411	-10.5142	1.95236e-05	0.000253161
ENSMUSG00000036820	Amdhd2	0.707272	5.18766	5.2409	0.00133554	0.00607954
ENSMUSG00000048534	Amica1	-1.48972	6.49883	-15.6977	1.43057e-06	4.63519e-05
ENSMUSG00000041688	Amot	0.826032	3.19783	3.59462	0.00933174	0.0268031
ENSMUSG00000005686	Ampd3	-0.902567	5.70969	-6.30133	0.000464029	0.00266858
ENSMUSG00000050022	Amz1	-0.74035	7.5133	-11.1179	1.36316e-05	0.000192195
ENSMUSG00000072115	Ang	6.28977	-1.40237	4.61792	0.0026604	0.0102119
ENSMUSG00000002289	Angptl4	2.81791	0.754666	4.03723	0.00531904	0.0172732
ENSMUSG00000066510	Ankdd1a	6.35525	-2.76137	3.42733	0.0116294	0.0317838
ENSMUSG00000046295	Ankle1	-1.49181	3.1049	-6.09408	0.000564533	0.00310037
ENSMUSG00000021661	Ankra2	-0.603984	4.78167	-4.40865	0.00339525	0.0122746
ENSMUSG00000031508	Ankrd10	-0.599348	5.9007	-5.94898	0.000649488	0.00344405
ENSMUSG00000041870	Ankrd13a	-0.735888	8.52347	-9.22878	4.48073e-05	0.000456477
ENSMUSG00000037907	Ankrd13b	3.85809	1.00357	5.44297	0.00108019	0.00513875
ENSMUSG00000005986	Ankrd13d	0.639404	3.95169	3.41022	0.0118969	0.0323864
ENSMUSG00000034867	Ankrd27	-0.688302	5.97681	-7.25148	0.000200174	0.00143133
ENSMUSG00000021597	Ankrd32	-0.692322	4.02607	-3.7113	0.00802346	0.0238339
ENSMUSG00000022237	Ankrd33b	-1.32756	3.9013	-7.38793	0.000178692	0.00131456
ENSMUSG00000038354	Ankrd35	-3.48396	1.74029	-7.57257	0.000153657	0.0011644
ENSMUSG00000044864	Ankrd50	-1.38721	5.78448	-12.47	6.47735e-06	0.000116143
ENSMUSG00000049985	Ankrd55	-2.46066	1.95136	-6.59633	0.000353901	0.00216733
ENSMUSG00000064210	Ano6	1.2566	6.86244	13.2492	4.36096e-06	8.98128e-05
ENSMUSG00000039062	Anpep	-2.95828	7.65341	-13.1725	4.52982e-06	9.19334e-05
ENSMUSG00000024659	Anxa1	1.60206	6.3942	13.3341	4.18245e-06	8.75494e-05
ENSMUSG00000032231	Anxa2	0.692453	7.56336	5.94931	0.00064928	0.00344405
ENSMUSG00000029994	Anxa4	0.653142	6.59615	7.30584	0.000191283	0.00138369
ENSMUSG00000027712	Anxa5	1.28789	8.18596	16.1695	1.17634e-06	4.08472e-05
ENSMUSG00000018340	Anxa6	-2.17571	8.57678	-32.7395	1.05598e-08	3.08357e-06
ENSMUSG00000021322	Aoah	6.92594	1.73472	5.89842	0.000682393	0.00356607
ENSMUSG00000004849	Ap1s1	1.08931	5.23423	9.10279	4.88712e-05	0.000485258
ENSMUSG00000054702	Ap1s3	-2.02612	5.26872	-17.2045	7.8009e-07	3.25159e-05
ENSMUSG00000002957	Ap2a2	1.51293	7.21506	17.5077	6.94765e-07	3.14053e-05
ENSMUSG00000024897	Apba1	1.46114	5.15995	8.4097	8.03304e-05	0.000712285
ENSMUSG00000005871	Apc	0.617575	6.46334	7.20836	0.00020756	0.0014647
ENSMUSG00000035960	Apex1	0.824773	2.75274	3.07113	0.0188312	0.0464865
ENSMUSG00000015750	Aph1a	0.729712	3.60987	3.75079	0.00762708	0.0228877
ENSMUSG00000032375	Aph1b	0.918014	4.41758	6.06341	0.000581394	0.00317678
ENSMUSG00000044338	Aplnr	7.90097	-0.791333	6.29085	0.000468597	0.00269021
ENSMUSG00000031996	Aplp2	0.782412	7.45379	10.6992	1.7454e-05	0.000233587
ENSMUSG00000040613	Apobec1	1.52353	7.59481	15.641	1.46511e-06	4.70718e-05
ENSMUSG00000009585	Apobec3	-0.672741	8.20129	-5.12719	0.00150852	0.00666285
ENSMUSG00000002992	Apoc2	9.75751	-1.06025	9.53591	3.64155e-05	0.000398196
ENSMUSG00000022548	Apod	4.54019	-1.58827	3.06872	0.0188939	0.0465852
ENSMUSG00000002985	Apoe	3.84508	9.8898	49.4848	6.53166e-10	1.41317e-06
ENSMUSG00000047631	Apof	-4.23656	1.41758	-4.89656	0.00194169	0.00807432
ENSMUSG00000050014	Apol10b	-2.68442	1.53093	-5.91557	0.000671025	0.00353217
ENSMUSG00000044309	Apol7c	-2.53	6.4427	-25.2051	6.1121e-08	7.59781e-06
ENSMUSG00000006589	Aprt	1.12311	4.451	6.50532	0.000384373	0.00230374
ENSMUSG00000028411	Aptx	-0.592654	4.5757	-3.83845	0.00682159	0.0209377
ENSMUSG00000004655	Aqp1	6.04836	-2.17214	3.98068	0.00570569	0.0182164
ENSMUSG00000032812	Arap1	2.89224	7.40075	30.8918	1.5605e-08	3.68394e-06
ENSMUSG00000037999	Arap2	-5.23778	5.53568	-31.0664	1.50251e-08	3.66695e-06
ENSMUSG00000024451	Arap3	3.51614	2.91256	12.0895	7.92394e-06	0.000132352
ENSMUSG00000062421	Arf2	0.715388	6.16871	8.03493	0.000106648	0.000876509
ENSMUSG00000054277	Arfgap3	1.03933	3.98374	4.34142	0.00367704	0.0130381
ENSMUSG00000074582	Arfgef2	-0.813166	6.70454	-7.82173	0.000125928	0.000994503
ENSMUSG00000040459	Arglu1	-0.60845	6.77176	-7.77911	0.00013024	0.00102231
ENSMUSG00000027247	Arhgap1	-0.666481	6.65554	-8.41031	8.02936e-05	0.000712285
ENSMUSG00000037148	Arhgap10	3.20886	1.83309	4.94497	0.00184036	0.00774235
ENSMUSG00000041225	Arhgap12	0.601712	5.34989	5.28065	0.0012804	0.00588237
ENSMUSG00000025154	Arhgap19	1.19109	5.55926	8.11938	9.99556e-05	0.000835851
ENSMUSG00000036591	Arhgap21	0.864071	4.40992	5.25116	0.00132107	0.00602637
ENSMUSG00000063506	Arhgap22	-1.14762	3.95817	-6.37529	0.000433173	0.00252255
ENSMUSG00000049807	Arhgap23	3.85376	2.41236	8.42197	7.96025e-05	0.000707725
ENSMUSG00000036452	Arhgap26	0.879268	6.18716	9.1102	4.86207e-05	0.000483514
ENSMUSG00000024043	Arhgap28	-2.50678	3.52496	-11.5747	1.05079e-05	0.000160384
ENSMUSG00000048865	Arhgap30	-0.896022	3.99472	-3.9899	0.00564057	0.0180562
ENSMUSG00000022799	Arhgap31	2.14875	4.79839	15.0088	1.92325e-06	5.45259e-05
ENSMUSG00000041444	Arhgap32	-1.21076	3.45943	-5.62287	0.000898208	0.00443376
ENSMUSG00000036882	Arhgap33	-1.30076	2.11313	-3.70318	0.00810766	0.0240293
ENSMUSG00000058230	Arhgap35	-0.913865	4.64354	-4.26659	0.0040214	0.013983
ENSMUSG00000050730	Arhgap42	-6.31485	-1.006	-4.22996	0.00420288	0.0144419
ENSMUSG00000031355	Arhgap6	-4.19159	5.06035	-21.7553	1.63608e-07	1.28189e-05
ENSMUSG00000071176	Arhgef10	0.796833	4.88921	3.5322	0.0101256	0.0285132
ENSMUSG00000040964	Arhgef10l	4.37688	4.83669	28.9816	2.39596e-08	4.55514e-06
ENSMUSG00000041977	Arhgef11	0.643383	5.9581	5.84623	0.000718348	0.00371067
ENSMUSG00000004568	Arhgef18	0.75324	6.17048	6.31327	0.000458882	0.00264841
ENSMUSG00000028059	Arhgef2	-0.716229	8.76251	-11.6157	1.02703e-05	0.000157316
ENSMUSG00000021895	Arhgef3	1.13253	6.15753	9.38212	4.03703e-05	0.000425353
ENSMUSG00000045094	Arhgef37	8.88853	-1.49474	7.46989	0.00016705	0.00124724
ENSMUSG00000051517	Arhgef39	-0.784428	3.88109	-3.47257	0.0109529	0.0302756
ENSMUSG00000037509	Arhgef4	-1.02319	2.85298	-4.00778	0.00551666	0.0177544
ENSMUSG00000004562	Arhgef40	-1.31629	5.1344	-9.53359	3.64717e-05	0.000398196
ENSMUSG00000039219	Arid4b	-0.775188	6.68144	-10.0513	2.60456e-05	0.000312781
ENSMUSG00000037447	Arid5a	0.635732	4.79669	4.50756	0.00302317	0.0112406
ENSMUSG00000060904	Arl1	0.620709	5.32619	5.58061	0.000937642	0.00458293
ENSMUSG00000043157	Arl11	1.80055	4.78816	12.4601	6.51071e-06	0.00011658
ENSMUSG00000042348	Arl15	0.918301	2.53381	3.24838	0.0147828	0.0383836
ENSMUSG00000038352	Arl5c	0.694467	6.87094	4.53057	0.00294321	0.0110186
ENSMUSG00000033436	Armcx2	-1.62101	3.42926	-5.72839	0.000807608	0.00407169
ENSMUSG00000026755	Arpc5l	-1.15925	6.50227	-13.09	4.7197e-06	9.40159e-05
ENSMUSG00000018909	Arrb1	2.26816	7.38236	30.7582	1.60661e-08	3.70226e-06
ENSMUSG00000060216	Arrb2	0.831365	7.54643	12.2416	7.30542e-06	0.000126131
ENSMUSG00000002910	Arrdc2	-0.638407	6.05213	-4.10933	0.0048672	0.0161341
ENSMUSG00000074794	Arrdc3	0.905092	5.75755	6.59863	0.000353169	0.00216387
ENSMUSG00000022620	Arsa	0.701213	5.55628	7.07539	0.000232348	0.00157514
ENSMUSG00000020604	Arsg	4.06332	-0.703724	3.36862	0.0125754	0.0338276
ENSMUSG00000036412	Arsi	4.17039	2.41294	11.7848	9.35185e-06	0.000147149
ENSMUSG00000031591	Asah1	1.05577	8.44587	17.0208	8.37599e-07	3.37591e-05
ENSMUSG00000024887	Asah2	4.04224	1.58135	9.26249	4.37862e-05	0.000449094
ENSMUSG00000052632	Asap2	-1.52273	3.74809	-8.12398	9.96047e-05	0.000833996
ENSMUSG00000021200	Asb2	-2.70731	8.72371	-9.15524	4.71303e-05	0.000472326
ENSMUSG00000040963	Asgr2	3.6899	1.46097	5.10594	0.00154356	0.00678283
ENSMUSG00000029752	Asns	5.54524	-1.58509	3.79995	0.00716324	0.021759
ENSMUSG00000028207	Asph	3.60531	4.77508	16.4189	1.06308e-06	3.88236e-05
ENSMUSG00000033952	Aspm	-1.10729	4.09146	-6.44237	0.000407175	0.00240254
ENSMUSG00000033508	Asprv1	-2.77878	3.22597	-9.66093	3.35239e-05	0.000373296
ENSMUSG00000024654	Asrgl1	-0.945423	4.54233	-5.57672	0.000941371	0.00459594
ENSMUSG00000076441	Ass1	-0.930769	3.00906	-3.16622	0.0165294	0.0419911
ENSMUSG00000022360	Atad2	-0.637218	6.46211	-4.44127	0.00326723	0.0119386
ENSMUSG00000017550	Atad5	-0.963087	5.06932	-7.15662	0.000216831	0.00150709
ENSMUSG00000024426	Atat1	-1.10239	3.59171	-4.07728	0.00506263	0.0166751
ENSMUSG00000026628	Atf3	2.82811	5.60746	11.8215	9.16498e-06	0.000145597
ENSMUSG00000026663	Atf6	0.757433	8.18571	10.3978	2.0968e-05	0.000267331
ENSMUSG00000039200	Atf7ip2	-5.65338	-2.07709	-3.67196	0.00844076	0.0248118
ENSMUSG00000024773	Atg2a	-0.596265	6.57296	-7.46452	0.000167786	0.00125094
ENSMUSG00000028550	Atg4c	0.611271	5.17515	4.7011	0.00241887	0.00950313
ENSMUSG00000038160	Atg5	0.684695	5.46218	6.02841	0.000601325	0.00325698
ENSMUSG00000030314	Atg7	0.988421	5.52103	9.87148	2.92248e-05	0.000337338
ENSMUSG00000033124	Atg9a	0.74985	4.46515	3.78262	0.00732315	0.0221511
ENSMUSG00000038295	Atg9b	6.73613	-1.82826	4.96314	0.00180387	0.0076355
ENSMUSG00000026192	Atic	1.01974	6.10799	7.43463	0.000171949	0.0012739
ENSMUSG00000004263	Atn1	1.00615	5.19237	7.77561	0.000130602	0.00102391
ENSMUSG00000025324	Atp10a	1.89556	3.46837	8.73828	6.32022e-05	0.000592515
ENSMUSG00000031441	Atp11a	-1.04378	5.90372	-10.5245	1.9401e-05	0.000252584
ENSMUSG00000036622	Atp13a2	1.53243	7.71942	14.825	2.08584e-06	5.64452e-05
ENSMUSG00000033161	Atp1a1	1.13696	9.32652	15.5005	1.55501e-06	4.84634e-05
ENSMUSG00000040907	Atp1a3	2.59481	7.09832	15.0801	1.86414e-06	5.32001e-05
ENSMUSG00000032412	Atp1b3	1.40374	6.51472	13.3328	4.18514e-06	8.75494e-05
ENSMUSG00000020788	Atp2a3	-0.978191	7.12872	-12.963	5.03009e-06	9.83797e-05
ENSMUSG00000019943	Atp2b1	2.31194	7.86909	35.937	5.64096e-09	2.5147e-06
ENSMUSG00000026463	Atp2b4	2.91608	1.64401	7.08708	0.00023004	0.00156524
ENSMUSG00000018770	Atp5g3	0.620987	6.74944	5.19007	0.00140997	0.00632701
ENSMUSG00000050856	Atp5k	1.07721	3.61593	4.2986	0.00386993	0.0135694
ENSMUSG00000022956	Atp5o	0.962196	5.60489	9.64682	3.38366e-05	0.000376131
ENSMUSG00000019087	Atp6ap1	0.826784	7.96326	9.62341	3.43632e-05	0.000381001
ENSMUSG00000031007	Atp6ap2	0.629565	7.39232	9.28275	4.31851e-05	0.000444504
ENSMUSG00000019302	Atp6v0a1	1.78189	6.24846	20.3373	2.56518e-07	1.65523e-05
ENSMUSG00000038023	Atp6v0a2	0.6006	7.11556	5.84712	0.000717711	0.00370994
ENSMUSG00000028238	Atp6v0d2	10.8636	-0.507187	12.637	5.93951e-06	0.000110009
ENSMUSG00000052459	Atp6v1a	0.745415	6.84415	9.93124	2.81216e-05	0.000328713
ENSMUSG00000006273	Atp6v1b2	1.85158	7.71832	20.4491	2.4731e-07	1.62296e-05
ENSMUSG00000033792	Atp7a	0.725587	5.90691	6.6343	0.000342003	0.00210352
ENSMUSG00000054428	Atpif1	0.631579	5.42588	5.98283	0.000628452	0.00336284
ENSMUSG00000032409	Atr	-0.613958	5.92805	-4.66838	0.00251087	0.0097655
ENSMUSG00000048997	Atxn7l2	-0.908676	3.21591	-3.40066	0.0120491	0.0327251
ENSMUSG00000097415	AU020206	0.853435	3.73731	3.60329	0.00922696	0.0265671
ENSMUSG00000068328	Aup1	0.659161	6.99469	8.98756	5.29582e-05	0.000513997
ENSMUSG00000027496	Aurka	-0.628104	3.64622	-3.26633	0.0144284	0.0376905
ENSMUSG00000018821	Avpi1	-2.26379	5.80025	-19.4354	3.47014e-07	1.98504e-05
ENSMUSG00000078349	AW011738	-1.12952	4.07201	-4.81862	0.00211812	0.00861102
ENSMUSG00000075010	AW112010	0.938548	5.82672	9.48403	3.76983e-05	0.000406814
ENSMUSG00000074166	AW146154	-1.13125	2.5682	-3.53768	0.0100531	0.028382
ENSMUSG00000041935	AW549877	1.4983	5.78398	12.3905	6.75274e-06	0.000119262
ENSMUSG00000000142	Axin2	-4.29091	-1.10521	-3.6065	0.00918853	0.0264977
ENSMUSG00000002602	Axl	4.53016	8.40714	9.08784	4.93805e-05	0.000487322
ENSMUSG00000039285	Azi2	0.659614	6.19263	7.07993	0.000231448	0.00157234
ENSMUSG00000050538	B230217C12Rik	-1.85108	3.939	-10.5697	1.8875e-05	0.00024723
ENSMUSG00000097119	B230354K17Rik	-1.04208	4.05974	-5.98025	0.000630028	0.00336913
ENSMUSG00000051950	B3glct	2.36338	2.35083	7.16956	0.000214468	0.00149707
ENSMUSG00000059479	B3gnt8	1.54136	4.58397	8.29524	8.74923e-05	0.000754366
ENSMUSG00000043740	B430306N03Rik	2.76457	4.13434	15.6209	1.47759e-06	4.71661e-05
ENSMUSG00000006731	B4galnt1	-1.4777	8.53862	-17.0841	8.17258e-07	3.33297e-05
ENSMUSG00000028413	B4galt1	0.658153	7.07301	8.71704	6.41743e-05	0.000600757
ENSMUSG00000022793	B4galt4	0.595288	5.03837	3.86163	0.00662442	0.0204735
ENSMUSG00000056124	B4galt6	-1.5725	6.87665	-21.3987	1.82697e-07	1.35819e-05
ENSMUSG00000052364	B630019K06Rik	-2.0305	3.52823	-9.59069	3.51147e-05	0.000388335
ENSMUSG00000063439	B9d2	-1.60914	4.67087	-9.40159	3.98436e-05	0.000421866
ENSMUSG00000025612	Bach1	0.82687	7.6479	10.7774	1.66557e-05	0.000225235
ENSMUSG00000040270	Bach2	2.48431	3.77405	7.73964	0.000134383	0.0010472
ENSMUSG00000030847	Bag3	1.07148	4.20853	4.35702	0.00360943	0.0128495
ENSMUSG00000039741	Bahcc1	1.01446	5.17262	4.86917	0.00200174	0.00825208
ENSMUSG00000025372	Baiap2	-0.878536	5.03241	-7.61024	0.000149052	0.0011355
ENSMUSG00000025316	Banp	-0.701697	5.36739	-4.46831	0.00316513	0.0116478
ENSMUSG00000026196	Bard1	-1.31751	3.87326	-6.28017	0.000473304	0.00270986
ENSMUSG00000034266	Batf	1.13679	4.14631	4.9884	0.00175446	0.00747089
ENSMUSG00000039699	Batf2	3.94109	0.750755	6.12158	0.000549882	0.00304449
ENSMUSG00000035021	Baz1a	-1.00996	8.03611	-14.8925	2.02441e-06	5.59606e-05
ENSMUSG00000040054	Baz2a	-0.786999	8.23829	-11.7561	9.50061e-06	0.000148697
ENSMUSG00000026987	Baz2b	-1.01238	7.74944	-14.9849	1.94361e-06	5.47429e-05
ENSMUSG00000002083	Bbc3	0.791752	4.39735	4.64074	0.00259159	0.0100191
ENSMUSG00000035919	Bbs9	-3.55571	4.86141	-25.5623	5.56213e-08	7.06875e-06
ENSMUSG00000060149	BC002059	-0.75544	3.57482	-3.28997	0.0139755	0.036775
ENSMUSG00000052712	BC004004	0.766314	5.40664	7.25337	0.000199856	0.00143064
ENSMUSG00000019132	BC005537	1.19124	9.04159	16.538	1.01345e-06	3.74562e-05
ENSMUSG00000081137	BC022960	-2.18698	0.650082	-3.90337	0.00628504	0.0196263
ENSMUSG00000038543	BC028528	2.21796	3.47276	10.3689	2.13452e-05	0.000270234
ENSMUSG00000047617	BC029214	-0.746294	4.33209	-4.86423	0.00201281	0.00828451
ENSMUSG00000046096	BC030336	-0.869855	4.13556	-4.31211	0.00380788	0.0133918
ENSMUSG00000090164	BC035044	-1.13842	6.40544	-13.1	4.6961e-06	9.38349e-05
ENSMUSG00000087594	BC039771	-4.68627	0.9849	-6.52134	0.000378799	0.00227667
ENSMUSG00000057246	BC051142	-3.51876	0.782598	-4.69249	0.00244272	0.00956375
ENSMUSG00000092564	BC051226	1.37475	2.29371	3.87346	0.00652623	0.0202182
ENSMUSG00000098197	BC051537	-2.33322	0.699186	-3.44986	0.0112869	0.0310199
ENSMUSG00000087150	BC064078	0.959257	3.57648	4.01277	0.00548262	0.0176756
ENSMUSG00000045231	BC106179	-4.24641	-0.720937	-3.47538	0.0109123	0.0302022
ENSMUSG00000002980	Bcam	-2.80949	-0.0071192	-3.46997	0.0109906	0.0303603
ENSMUSG00000002015	Bcap31	0.68209	6.70896	8.18898	9.47962e-05	0.000802714
ENSMUSG00000028121	Bcar3	5.36824	-0.514331	5.32451	0.00122249	0.0056748
ENSMUSG00000013523	Bcas1	-2.37313	1.89723	-5.99929	0.0006185	0.00332185
ENSMUSG00000000861	Bcl11a	-2.16632	6.92817	-24.1546	8.12849e-08	8.61354e-06
ENSMUSG00000057329	Bcl2	1.6511	3.53652	5.11623	0.00152648	0.00673258
ENSMUSG00000102037	Bcl2a1a	-1.00773	4.09566	-4.39779	0.00343909	0.0123949
ENSMUSG00000089929	Bcl2a1b	-1.40349	4.72975	-9.97035	2.74252e-05	0.000323203
ENSMUSG00000099974	Bcl2a1d	-1.05542	4.94091	-8.63057	6.8312e-05	0.000631715
ENSMUSG00000027381	Bcl2l11	1.09657	5.51046	10.4935	1.9772e-05	0.000255564
ENSMUSG00000003190	Bcl2l12	-0.814202	3.12001	-3.16394	0.0165809	0.0420969
ENSMUSG00000044165	Bcl2l15	-4.90148	-0.146911	-4.44798	0.00324155	0.0118716
ENSMUSG00000089682	Bcl2l2	1.09477	4.09766	6.77387	0.000301989	0.00191138
ENSMUSG00000053175	Bcl3	-0.657221	6.03841	-7.19949	0.000209116	0.00146942
ENSMUSG00000029438	Bcl7a	-2.08492	3.63741	-10.1044	2.51836e-05	0.000305129
ENSMUSG00000038256	Bcl9	-1.36908	6.19889	-12.9036	5.18301e-06	0.000100009
ENSMUSG00000063382	Bcl9l	-1.33341	5.27073	-9.30137	4.26411e-05	0.000441365
ENSMUSG00000040363	Bcor	-0.837063	6.99346	-11.1102	1.36927e-05	0.000192831
ENSMUSG00000036959	Bcorl1	2.16586	2.48266	6.76191	0.000305204	0.00192378
ENSMUSG00000046598	Bdh1	-4.38963	-0.183677	-3.36917	0.0125662	0.0338099
ENSMUSG00000021070	Bdkrb2	-5.31368	-2.24694	-3.17738	0.0162797	0.0414708
ENSMUSG00000099757	BE692007	0.666019	6.09085	7.55508	0.000155849	0.00117894
ENSMUSG00000092060	Bend4	-1.21372	6.21155	-8.51921	7.40953e-05	0.000669597
ENSMUSG00000075269	Bex6	-1.90698	5.81823	-10.0089	2.67582e-05	0.000318265
ENSMUSG00000031375	Bgn	6.69446	-2.59177	3.78899	0.00726397	0.022003
ENSMUSG00000072964	Bhlhb9	-2.10358	2.90117	-5.41793	0.00110865	0.00523281
ENSMUSG00000030103	Bhlhe40	-1.02445	6.52633	-6.06715	0.000579305	0.00316939
ENSMUSG00000024381	Bin1	-0.702732	7.0451	-9.73521	3.19297e-05	0.000360198
ENSMUSG00000057367	Birc2	-0.898895	6.87182	-9.24706	4.42502e-05	0.000452585
ENSMUSG00000024073	Birc6	-0.690816	8.52805	-9.80703	3.04701e-05	0.000347984
ENSMUSG00000014453	Blk	-4.44145	2.46726	-14.5436	2.36623e-06	6.14783e-05
ENSMUSG00000061132	Blnk	5.03763	3.09287	11.2955	1.23054e-05	0.000178999
ENSMUSG00000057506	Bloc1s2	-1.5738	4.69726	-9.91666	2.83864e-05	0.000331208
ENSMUSG00000025201	Bloc1s2-ps	-0.999861	3.78817	-4.18205	0.00445397	0.0151012
ENSMUSG00000001999	Blvra	1.55715	5.03006	12.8145	5.42282e-06	0.000103459
ENSMUSG00000040466	Blvrb	2.29739	4.32283	6.92092	0.000265448	0.00174731
ENSMUSG00000027358	Bmp2	-2.69375	1.7045	-4.29362	0.00389305	0.0136283
ENSMUSG00000034663	Bmp2k	-0.939439	7.24414	-11.3439	1.19699e-05	0.000175359
ENSMUSG00000032726	Bmp8a	-4.97455	0.732539	-5.97482	0.000633362	0.00338212
ENSMUSG00000031963	Bmper	-4.29237	-1.25814	-3.13947	0.0171447	0.0431976
ENSMUSG00000078566	Bnip3	1.30212	2.27973	3.48248	0.0108104	0.0299779
ENSMUSG00000047721	Bola2	0.766929	4.4421	3.87309	0.00652932	0.0202182
ENSMUSG00000078998	Bpifa6	-7.23971	-2.31915	-4.55017	0.00287696	0.0108424
ENSMUSG00000074665	Bpifb4	-7.52144	-1.42354	-6.04645	0.000590958	0.0032168
ENSMUSG00000017146	Brca1	-1.16366	4.12769	-4.45928	0.00319883	0.0117484
ENSMUSG00000037905	Bri3bp	-0.966035	7.08978	-13.1767	4.5202e-06	9.19334e-05
ENSMUSG00000012076	Brms1l	-0.834697	4.23653	-4.20574	0.00432778	0.014778
ENSMUSG00000023175	Bsg	0.759858	7.0939	9.18573	4.61509e-05	0.000464672
ENSMUSG00000029082	Bst1	6.17377	0.910755	5.08782	0.00157414	0.00688446
ENSMUSG00000046718	Bst2	1.4389	6.32779	14.1504	2.83316e-06	6.83341e-05
ENSMUSG00000038187	Btbd10	-0.594421	4.64905	-3.84385	0.00677506	0.0208443
ENSMUSG00000020042	Btbd11	8.19579	-1.84111	6.03026	0.000600252	0.00325506
ENSMUSG00000040298	Btbd16	-4.39042	-0.179855	-5.43578	0.00108828	0.00515925
ENSMUSG00000073771	Btbd19	1.17306	2.80578	3.70176	0.00812254	0.0240679
ENSMUSG00000062098	Btbd3	0.736693	3.93918	4.12717	0.00476204	0.0158754
ENSMUSG00000002803	Btbd6	-0.882632	3.1735	-3.33181	0.0132108	0.0351492
ENSMUSG00000036478	Btg1	-0.706329	8.64766	-8.51879	7.41177e-05	0.000669597
ENSMUSG00000052013	Btla	-0.778182	5.94306	-8.39833	8.10111e-05	0.000714401
ENSMUSG00000027379	Bub1	-0.758016	4.271	-4.31741	0.00378385	0.0133327
ENSMUSG00000034156	Bzrap1	-2.98175	3.7986	-13.8823	3.21215e-06	7.37967e-05
ENSMUSG00000060380	C030014I23Rik	-2.43308	0.383672	-3.75336	0.00760208	0.0228451
ENSMUSG00000052477	C130026I21Rik	-1.60868	1.55259	-3.96823	0.00579488	0.0184447
ENSMUSG00000044092	C130050O18Rik	1.69319	4.06067	5.15708	0.00146075	0.00649846
ENSMUSG00000048970	C1galt1c1	0.815272	3.92177	3.46336	0.011087	0.0305548
ENSMUSG00000036887	C1qa	4.43962	7.27746	12.7188	5.69473e-06	0.000106771
ENSMUSG00000036905	C1qb	4.94651	7.74293	12.5198	6.31126e-06	0.000114851
ENSMUSG00000036896	C1qc	4.31717	7.26125	9.34027	4.15296e-05	0.00043403
ENSMUSG00000055172	C1ra	6.97057	-2.45372	4.18416	0.00444255	0.0150744
ENSMUSG00000045975	C2cd2	0.84607	3.98735	4.81615	0.00212401	0.00862903
ENSMUSG00000030279	C2cd5	-0.779246	6.28164	-7.60321	0.000149899	0.00113994
ENSMUSG00000024164	C3	3.72608	6.66865	17.8732	6.05745e-07	2.85806e-05
ENSMUSG00000006423	C330007P06Rik	0.858321	4.60182	4.99196	0.00174762	0.00745159
ENSMUSG00000040552	C3ar1	9.72169	2.40961	8.55372	7.22457e-05	0.000659599
ENSMUSG00000049130	C5ar1	7.47129	0.875713	6.69353	0.000324333	0.00202071
ENSMUSG00000022181	C6	-7.13541	-0.632697	-5.1525	0.00146796	0.00652158
ENSMUSG00000097320	C630016N16Rik	-2.16339	1.18081	-4.38932	0.00347373	0.012478
ENSMUSG00000080727	C920021L13Rik	1.54976	1.29103	3.17061	0.0164306	0.0417892
ENSMUSG00000040957	Cables1	3.916	-0.405294	3.33011	0.013241	0.0352148
ENSMUSG00000015968	Cacna1d	5.71726	1.123	4.37061	0.00355164	0.0126909
ENSMUSG00000004110	Cacna1e	-5.54179	3.94206	-15.9211	1.30308e-06	4.36432e-05
ENSMUSG00000031142	Cacna1f	6.6386	-1.71752	4.75758	0.00226879	0.00904537
ENSMUSG00000020866	Cacna1g	-4.85364	-1.14296	-3.86298	0.00661318	0.0204436
ENSMUSG00000003352	Cacnb3	-1.56008	6.06692	-16.6085	9.85276e-07	3.70863e-05
ENSMUSG00000017412	Cacnb4	-1.7465	1.70384	-3.66774	0.00848694	0.0249052
ENSMUSG00000053395	Cacng8	-4.08464	3.33685	-15.5693	1.51024e-06	4.7854e-05
ENSMUSG00000032076	Cadm1	3.41404	5.64098	18.8439	4.26249e-07	2.25842e-05
ENSMUSG00000005338	Cadm3	-1.89636	6.87955	-21.2599	1.90806e-07	1.38335e-05
ENSMUSG00000003814	Calr	0.738371	9.79854	9.37984	4.04324e-05	0.00042566
ENSMUSG00000029767	Calu	0.592274	6.77052	7.93126	0.00011557	0.000934976
ENSMUSG00000030272	Camk1	2.54473	4.64045	15.9777	1.27287e-06	4.30778e-05
ENSMUSG00000039145	Camk1d	1.18208	7.91865	15.5017	1.55424e-06	4.84634e-05
ENSMUSG00000024617	Camk2a	-1.04109	2.81996	-4.03574	0.00532881	0.0172919
ENSMUSG00000020785	Camkk1	-2.62968	3.53594	-12.6231	5.98225e-06	0.000110169
ENSMUSG00000029471	Camkk2	2.91122	5.39262	20.5152	2.42049e-07	1.61299e-05
ENSMUSG00000071037	Camkmt	-1.662	2.98637	-5.40076	0.00112866	0.00531171
ENSMUSG00000038357	Camp	11.7729	-0.0525283	15.325	1.67631e-06	4.99313e-05
ENSMUSG00000026933	Camsap1	-0.714601	4.27256	-3.4414	0.0114142	0.0312899
ENSMUSG00000020368	Canx	0.832853	9.18024	11.9945	8.34042e-06	0.000137254
ENSMUSG00000056737	Capg	6.29055	3.53842	15.282	1.70767e-06	5.05351e-05
ENSMUSG00000026509	Capn2	1.43459	6.14121	11.5365	1.0735e-05	0.00016289
ENSMUSG00000035547	Capn5	4.61814	0.241052	3.73736	0.00775942	0.0231886
ENSMUSG00000001794	Capns1	0.622242	7.66696	9.39803	3.99393e-05	0.000422393
ENSMUSG00000030309	Caprin2	-1.28827	2.44432	-3.67281	0.00843143	0.02479
ENSMUSG00000075289	Carns1	-1.70765	2.90491	-5.6263	0.000895092	0.00442648
ENSMUSG00000027326	Casc5	-1.17612	4.55644	-8.13966	9.84196e-05	0.000827087
ENSMUSG00000031012	Cask	1.03868	5.2492	8.91199	5.58493e-05	0.000534645
ENSMUSG00000034471	Caskin2	-0.857547	3.24201	-3.36692	0.012604	0.0338902
ENSMUSG00000033538	Casp4	0.984452	4.44238	4.86938	0.00200127	0.00825208
ENSMUSG00000025076	Casp7	-0.942677	5.6771	-8.372	8.2613e-05	0.000723101
ENSMUSG00000026029	Casp8	0.596197	6.7189	6.48936	0.000390015	0.00233
ENSMUSG00000074570	Cass4	-1.45758	4.47474	-9.22463	4.4935e-05	0.000457417
ENSMUSG00000021585	Cast	0.92938	6.62726	11.8936	8.81054e-06	0.00014167
ENSMUSG00000028977	Casz1	-1.43485	3.37757	-6.45556	0.000402275	0.00238123
ENSMUSG00000007655	Cav1	7.41723	-1.20864	6.5183	0.000379851	0.00228087
ENSMUSG00000000058	Cav2	5.86593	1.3454	5.09386	0.00156386	0.00685006
ENSMUSG00000006362	Cbfa2t3	-0.95806	8.18591	-11.5386	1.07223e-05	0.000162889
ENSMUSG00000051483	Cbr1	0.843513	2.94657	3.44318	0.0113873	0.0312359
ENSMUSG00000025150	Cbr2	5.47653	1.08351	4.47453	0.00314214	0.0115833
ENSMUSG00000025577	Cbx2	-1.39874	2.25645	-3.31851	0.0134488	0.0356372
ENSMUSG00000009575	Cbx5	-0.739705	6.92652	-9.02126	5.1724e-05	0.00050467
ENSMUSG00000063605	Ccdc102a	-2.33754	5.74469	-23.4584	9.88565e-08	9.94635e-06
ENSMUSG00000027994	Ccdc109b	3.9198	4.39335	17.0942	8.14064e-07	3.33297e-05
ENSMUSG00000034795	Ccdc122	-0.977031	3.37722	-4.50221	0.00304209	0.0112914
ENSMUSG00000048924	Ccdc125	1.34522	2.11954	3.06375	0.0190239	0.046819
ENSMUSG00000019767	Ccdc170	6.94021	-1.44715	5.50801	0.00101001	0.00485046
ENSMUSG00000052407	Ccdc171	-0.850645	3.40474	-3.66571	0.00850918	0.02495
ENSMUSG00000026578	Ccdc181	-0.69232	3.52352	-3.41202	0.0118685	0.0323363
ENSMUSG00000028643	Ccdc23	1.44339	3.51251	5.55796	0.000959579	0.00466545
ENSMUSG00000059554	Ccdc28a	-0.959716	3.12632	-3.7575	0.00756186	0.022756
ENSMUSG00000038127	Ccdc50	0.750666	8.22405	10.5163	1.94977e-05	0.000253079
ENSMUSG00000081553	Ccdc50-ps	2.08081	2.5575	5.14237	0.00148405	0.00658174
ENSMUSG00000061882	Ccdc62	-1.73374	0.94772	-3.1438	0.0170435	0.043032
ENSMUSG00000046753	Ccdc66	-0.630871	4.17377	-3.90339	0.00628489	0.0196263
ENSMUSG00000049588	Ccdc69	-0.659426	5.35737	-4.63754	0.00260111	0.010038
ENSMUSG00000032740	Ccdc88a	0.704643	8.04278	10.9944	1.46498e-05	0.000203648
ENSMUSG00000047810	Ccdc88b	-1.09344	8.95965	-14.0949	2.90732e-06	6.92905e-05
ENSMUSG00000030613	Ccdc90b	1.05751	2.87249	4.01204	0.00548758	0.0176835
ENSMUSG00000026339	Ccdc93	0.585498	5.58501	5.1654	0.00144775	0.00645842
ENSMUSG00000040312	Cchcr1	-1.44172	3.62031	-6.68184	0.000327739	0.00203507
ENSMUSG00000035385	Ccl2	6.42553	0.145108	7.14875	0.000218283	0.00151565
ENSMUSG00000031779	Ccl22	2.80767	3.85145	9.9229	2.82726e-05	0.000330179
ENSMUSG00000004814	Ccl24	4.40069	0.340614	3.53614	0.0100734	0.0283918
ENSMUSG00000000982	Ccl3	2.29986	4.60319	14.7744	2.13333e-06	5.70794e-05
ENSMUSG00000018930	Ccl4	2.15186	3.47397	9.0318	5.13446e-05	0.000501347
ENSMUSG00000035042	Ccl5	-1.14177	6.88901	-3.95278	0.00590774	0.0186952
ENSMUSG00000018927	Ccl6	4.60663	6.87565	39.2388	3.121e-09	1.95169e-06
ENSMUSG00000035373	Ccl7	7.53896	-2.16952	5.00894	0.00171538	0.0073432
ENSMUSG00000019122	Ccl9	4.92705	7.00753	26.6537	4.20256e-08	6.10457e-06
ENSMUSG00000027715	Ccna2	-0.675795	4.81333	-5.04957	0.00164093	0.00711879
ENSMUSG00000070348	Ccnd1	-2.16244	9.55118	-21.3117	1.8773e-07	1.37317e-05
ENSMUSG00000072082	Ccnf	-1.24022	4.31528	-7.86276	0.00012193	0.00097363
ENSMUSG00000011960	Ccnt1	-0.637687	6.4421	-4.3513	0.00363406	0.0129175
ENSMUSG00000026349	Ccnt2	-0.734534	7.33065	-7.62717	0.000147033	0.00112476
ENSMUSG00000025804	Ccr1	4.56543	2.91533	15.9074	1.3105e-06	4.37781e-05
ENSMUSG00000049103	Ccr2	6.48312	8.12362	45.7027	1.11666e-09	1.41317e-06
ENSMUSG00000079227	Ccr5	4.42749	5.62151	25.1381	6.22204e-08	7.61381e-06
ENSMUSG00000040899	Ccr6	-5.60768	2.89747	-12.7143	5.70785e-06	0.000106771
ENSMUSG00000037944	Ccr7	-1.61787	6.36668	-11.4606	1.12035e-05	0.000167561
ENSMUSG00000029530	Ccr9	-2.06294	1.04238	-3.57604	0.00956082	0.0272792
ENSMUSG00000043953	Ccrl2	-1.72956	5.53541	-9.14608	4.74292e-05	0.000474586
ENSMUSG00000023087	Ccrn4l	2.27561	3.38807	9.97109	2.74123e-05	0.000323203
ENSMUSG00000039578	Ccser1	-3.19881	1.73091	-6.07293	0.000576096	0.00315851
ENSMUSG00000058690	Ccser2	-0.635969	5.37956	-5.78362	0.000764307	0.00390552
ENSMUSG00000086564	Cd101	-1.63182	5.17681	-11.2508	1.2625e-05	0.000181553
ENSMUSG00000046186	Cd109	6.69107	-2.59347	3.81098	0.00706346	0.0215267
ENSMUSG00000051439	Cd14	3.81005	4.40943	14.2156	2.74896e-06	6.69861e-05
ENSMUSG00000025510	Cd151	1.13447	3.83402	6.32565	0.000453616	0.00262387
ENSMUSG00000008845	Cd163	3.16155	5.07027	6.81723	0.000290656	0.00186389
ENSMUSG00000052212	Cd177	4.65678	3.00672	7.45041	0.000169736	0.00125967
ENSMUSG00000028076	Cd1d1	-1.34266	4.87508	-7.23032	0.00020376	0.00145056
ENSMUSG00000022661	Cd200	-1.19901	2.992	-4.81147	0.00213519	0.0086478
ENSMUSG00000036172	Cd200r3	-4.13447	-1.32712	-3.2214	0.0153335	0.0395831
ENSMUSG00000031494	Cd209a	2.11675	9.03416	20.5703	2.37751e-07	1.60086e-05
ENSMUSG00000065987	Cd209b	1.84994	3.44164	6.09762	0.000562622	0.00309382
ENSMUSG00000040165	Cd209c	3.71453	3.20793	7.70943	0.000137656	0.00106756
ENSMUSG00000031495	Cd209d	3.40731	1.54741	8.05585	0.000104944	0.000864702
ENSMUSG00000030577	Cd22	-3.60853	6.72106	-39.1476	3.17029e-09	1.95169e-06
ENSMUSG00000034028	Cd226	3.2294	1.08217	5.20854	0.0013824	0.00624011
ENSMUSG00000004709	Cd244	-1.3581	7.74607	-16.0925	1.21404e-06	4.1412e-05
ENSMUSG00000047139	Cd24a	1.35435	3.5892	6.92148	0.00026532	0.00174731
ENSMUSG00000016496	Cd274	-1.58923	7.29222	-7.22182	0.000205222	0.00145752
ENSMUSG00000034652	Cd300a	0.642873	8.7132	9.21173	4.53339e-05	0.000459668
ENSMUSG00000048498	Cd300e	2.86932	6.31345	12.3492	6.90111e-06	0.000121219
ENSMUSG00000063193	Cd300lb	2.46489	5.76098	17.2981	7.52513e-07	3.25159e-05
ENSMUSG00000034641	Cd300ld	1.44766	6.69172	14.0271	3.00076e-06	7.10509e-05
ENSMUSG00000047798	Cd300lf	-2.74346	6.84152	-9.37665	4.05196e-05	0.00042623
ENSMUSG00000017309	Cd300lg	3.46929	4.26844	9.58418	3.52665e-05	0.000389347
ENSMUSG00000060703	Cd302	2.47989	4.74272	11.2253	1.2811e-05	0.000183615
ENSMUSG00000004609	Cd33	3.29784	4.68522	17.9834	5.81522e-07	2.78441e-05
ENSMUSG00000002944	Cd36	6.78422	3.48361	22.6048	1.26665e-07	1.15161e-05
ENSMUSG00000023274	Cd4	-2.60481	7.60129	-8.23298	9.16909e-05	0.000782429
ENSMUSG00000005087	Cd44	1.05088	8.00896	13.0942	4.70977e-06	9.39629e-05
ENSMUSG00000015355	Cd48	0.665649	7.48298	8.53744	7.31112e-05	0.000665153
ENSMUSG00000024669	Cd5	-5.72252	1.91488	-13.0553	4.8023e-06	9.49298e-05
ENSMUSG00000025351	Cd63	2.60783	4.67147	18.3001	5.17841e-07	2.55521e-05
ENSMUSG00000085939	Cd63-ps	2.41571	4.29266	14.9472	1.97615e-06	5.52978e-05
ENSMUSG00000018774	Cd68	1.18553	8.43096	13.9558	3.1028e-06	7.28003e-05
ENSMUSG00000025163	Cd7	-4.84235	5.39902	-46.4632	9.99042e-10	1.41317e-06
ENSMUSG00000024610	Cd74	0.598093	14.0741	6.94752	0.000259387	0.00171905
ENSMUSG00000040592	Cd79b	0.954859	4.83611	4.20824	0.00431468	0.0147528
ENSMUSG00000075122	Cd80	-1.40936	5.02793	-12.0159	8.24469e-06	0.000136301
ENSMUSG00000037706	Cd81	1.39174	6.96266	11.2744	1.24549e-05	0.000179908
ENSMUSG00000027215	Cd82	-1.17596	7.7827	-18.2748	5.2264e-07	2.56909e-05
ENSMUSG00000015396	Cd83	-0.601542	8.19656	-7.61282	0.000148742	0.00113448
ENSMUSG00000038147	Cd84	3.70649	4.97193	17.2169	7.76372e-07	3.25159e-05
ENSMUSG00000053977	Cd8a	-3.32114	0.690694	-6.02835	0.000601362	0.00325698
ENSMUSG00000027435	Cd93	7.36515	5.1898	31.0639	1.50331e-08	3.66695e-06
ENSMUSG00000035776	Cd99l2	3.70109	1.86699	7.81211	0.000126887	0.00100024
ENSMUSG00000033502	Cdc14a	-1.41225	6.17724	-14.7295	2.17654e-06	5.76294e-05
ENSMUSG00000032477	Cdc25a	-0.647412	4.94431	-5.02895	0.00167827	0.00723222
ENSMUSG00000024780	Cdc37l1	-0.650374	5.05273	-5.34352	0.00119831	0.00559344
ENSMUSG00000036533	Cdc42ep3	-0.889262	5.81392	-7.14495	0.000218987	0.00151881
ENSMUSG00000041598	Cdc42ep4	1.67686	4.58017	11.6553	1.00461e-05	0.000154798
ENSMUSG00000029283	Cdc7	-1.31791	4.03851	-5.84087	0.000722158	0.00372548
ENSMUSG00000048922	Cdca2	-1.3405	3.4558	-6.01865	0.000607022	0.00327665
ENSMUSG00000021175	Cdca7l	-0.665825	4.3596	-4.38934	0.00347368	0.012478
ENSMUSG00000028873	Cdca8	-0.935845	4.33765	-6.09872	0.000562032	0.00309321
ENSMUSG00000035498	Cdcp1	-7.94172	2.37001	-6.66434	0.00033291	0.00205828
ENSMUSG00000028217	Cdh17	-11.1031	-0.38743	-13.7512	3.41848e-06	7.72624e-05
ENSMUSG00000053166	Cdh22	-4.00462	-0.386493	-3.32784	0.0132814	0.0352934
ENSMUSG00000021803	Cdhr1	-3.20803	0.25998	-3.67556	0.00840161	0.0247192
ENSMUSG00000035860	Cdhr3	-11.3939	-0.242028	-14.8813	2.03446e-06	5.59606e-05
ENSMUSG00000003119	Cdk12	-0.643887	6.67925	-7.02573	0.000242452	0.00162658
ENSMUSG00000028926	Cdk14	-1.05595	6.52957	-7.72476	0.000135984	0.00105713
ENSMUSG00000026437	Cdk18	5.38322	-2.12997	3.39294	0.0121738	0.0329874
ENSMUSG00000025358	Cdk2	-0.722738	5.89157	-6.72686	0.000314844	0.00197205
ENSMUSG00000024856	Cdk2ap2	1.37061	6.71221	17.2011	7.81104e-07	3.25159e-05
ENSMUSG00000040274	Cdk6	1.02643	5.97234	8.57913	7.09174e-05	0.000649624
ENSMUSG00000023067	Cdkn1a	2.11865	4.66	15.9307	1.29786e-06	4.36008e-05
ENSMUSG00000037664	Cdkn1c	4.99542	-1.67103	3.01291	0.0204081	0.0495839
ENSMUSG00000044303	Cdkn2a	-4.58847	-1.34512	-3.61419	0.00909702	0.0263042
ENSMUSG00000073802	Cdkn2b	-5.04529	0.829206	-8.04754	0.000105617	0.000869141
ENSMUSG00000028551	Cdkn2c	-0.850692	4.52665	-5.61781	0.000902828	0.00444808
ENSMUSG00000096472	Cdkn2d	1.1337	3.65834	4.95647	0.00181716	0.00766824
ENSMUSG00000038119	Cdon	-6.59443	4.01016	-39.2794	3.09931e-09	1.95169e-06
ENSMUSG00000029330	Cds1	1.87037	4.07753	6.45311	0.000403181	0.00238441
ENSMUSG00000059288	Cdyl	-0.777387	4.83613	-6.24894	0.000487382	0.00277572
ENSMUSG00000031758	Cdyl2	-1.70109	5.79433	-17.2598	7.63673e-07	3.25159e-05
ENSMUSG00000074272	Ceacam1	1.78822	4.53155	9.59666	3.49764e-05	0.000387136
ENSMUSG00000014686	Ceacam16	-3.71816	3.91489	-10.4009	2.09285e-05	0.000267259
ENSMUSG00000049848	Ceacam19	2.01554	0.771528	3.62858	0.00892846	0.0259445
ENSMUSG00000034957	Cebpa	2.22407	6.64678	28.0847	2.95896e-08	4.93099e-06
ENSMUSG00000056501	Cebpb	2.70057	3.15872	6.09308	0.000565074	0.00310203
ENSMUSG00000071637	Cebpd	0.83336	4.77017	6.12436	0.000548426	0.00304038
ENSMUSG00000024081	Cebpz	-0.713859	6.55067	-8.82314	5.94808e-05	0.000564587
ENSMUSG00000023031	Cela1	2.40085	0.897073	4.4342	0.0032945	0.0120179
ENSMUSG00000024268	Celf4	0.722912	4.19197	3.62801	0.00893509	0.0259463
ENSMUSG00000016028	Celsr1	-4.05335	1.93843	-9.91357	2.84428e-05	0.000331268
ENSMUSG00000068267	Cenpb	1.62256	6.36526	13.2698	4.31698e-06	8.92958e-05
ENSMUSG00000045328	Cenpe	-0.764522	4.91261	-4.59893	0.00271924	0.0103764
ENSMUSG00000026605	Cenpf	-0.856107	4.67762	-5.78535	0.000762991	0.00390188
ENSMUSG00000064128	Cenpj	-0.67733	4.1906	-4.04584	0.00526271	0.0171333
ENSMUSG00000023919	Cenpq	-0.658861	3.31748	-3.05363	0.0192912	0.0473418
ENSMUSG00000056919	Cep162	-1.10188	5.16311	-9.23376	4.46547e-05	0.00045564
ENSMUSG00000072825	Cep170b	-2.03833	2.61017	-6.12389	0.000548671	0.00304038
ENSMUSG00000024989	Cep55	-0.697437	3.81099	-3.37636	0.012446	0.0335632
ENSMUSG00000019813	Cep57l1	-1.55911	3.67841	-7.01063	0.000245621	0.00164357
ENSMUSG00000032534	Cep63	-2.24081	6.28748	-24.4474	7.4984e-08	8.22058e-06
ENSMUSG00000056267	Cep70	-1.71009	4.71481	-11.9018	8.77128e-06	0.00014139
ENSMUSG00000020024	Cep83	-0.793967	5.40419	-5.73015	0.000806189	0.00406892
ENSMUSG00000038594	Cep85l	-0.88018	3.87271	-4.32591	0.00374565	0.0132233
ENSMUSG00000022604	Cep97	-2.05867	3.39907	-7.83496	0.000124623	0.000986606
ENSMUSG00000040774	Cept1	0.605312	6.17537	6.85469	0.000281249	0.00182516
ENSMUSG00000039787	Cercam	-1.53835	3.39798	-6.8037	0.00029414	0.00187971
ENSMUSG00000035891	Cerk	0.590137	7.44245	8.02911	0.000107128	0.000879332
ENSMUSG00000015714	Cers2	0.747613	7.09975	9.52858	3.65938e-05	0.000398555
ENSMUSG00000023021	Cers5	0.676666	5.95023	7.67108	0.00014194	0.00109487
ENSMUSG00000031796	Cfap20	0.655497	3.61265	3.2055	0.0156682	0.0402701
ENSMUSG00000020462	Cfap36	-1.16873	4.21265	-6.71232	0.000318945	0.00199387
ENSMUSG00000026365	Cfh	4.7993	4.2813	28.1315	2.9261e-08	4.93099e-06
ENSMUSG00000001128	Cfp	-0.647425	8.53856	-8.91143	5.58714e-05	0.000534645
ENSMUSG00000055128	Cgrrf1	2.23413	2.2646	4.14084	0.00468315	0.0156687
ENSMUSG00000049422	Chchd10	1.94007	1.34403	3.02805	0.019985	0.0487114
ENSMUSG00000057133	Chd6	-0.70123	6.57725	-8.76456	6.20222e-05	0.000583993
ENSMUSG00000041235	Chd7	-1.00916	6.57806	-10.6287	1.82121e-05	0.000240021
ENSMUSG00000056608	Chd9	-0.669259	7.69103	-9.89413	2.88009e-05	0.000333936
ENSMUSG00000025512	Chid1	0.679178	5.06785	5.59269	0.000926182	0.00454237
ENSMUSG00000064246	Chil1	7.92821	-1.07272	6.76415	0.000304598	0.00192141
ENSMUSG00000040809	Chil3	12.1323	0.127148	17.2624	7.62896e-07	3.25159e-05
ENSMUSG00000024843	Chka	-2.66819	6.37645	-24.3161	7.77379e-08	8.30575e-06
ENSMUSG00000078185	Chml	0.661407	5.00188	5.21633	0.00137095	0.00619926
ENSMUSG00000004633	Chn2	-1.90376	5.69046	-15.4206	1.60897e-06	4.94043e-05
ENSMUSG00000014077	Chp1	0.60332	6.3733	6.47486	0.00039522	0.00235456
ENSMUSG00000030865	Chp2	8.26496	-1.80652	5.98794	0.000625346	0.00335177
ENSMUSG00000060002	Chpt1	1.55911	3.59233	6.74312	0.000310329	0.00195038
ENSMUSG00000041189	Chrnb1	-1.8946	0.735968	-3.49188	0.0106772	0.0296978
ENSMUSG00000026080	Chst10	-4.59273	2.58903	-12.1919	7.50126e-06	0.000128433
ENSMUSG00000036599	Chst12	1.12872	5.12381	10.0792	2.55878e-05	0.000308758
ENSMUSG00000030930	Chst15	-1.51736	6.07545	-13.1347	4.6155e-06	9.27982e-05
ENSMUSG00000057337	Chst3	-1.68503	1.70749	-4.00917	0.00550716	0.0177327
ENSMUSG00000037347	Chst7	1.29583	3.0546	4.68047	0.00247642	0.00966932
ENSMUSG00000025199	Chuk	-0.948499	7.12823	-13.1406	4.60198e-06	9.26704e-05
ENSMUSG00000037493	Cib2	2.77203	1.91863	7.17557	0.000213383	0.00149195
ENSMUSG00000005442	Cic	0.698737	8.32631	11.1041	1.3741e-05	0.000193132
ENSMUSG00000022504	Ciita	-0.767745	10.2365	-10.0506	2.6057e-05	0.000312781
ENSMUSG00000021276	Cinp	0.654299	3.48094	3.25502	0.0146506	0.0380939
ENSMUSG00000034157	Cipc	-0.832741	5.0616	-4.84845	0.00204857	0.00840226
ENSMUSG00000078695	Cisd3	1.30786	1.96499	3.31456	0.0135205	0.0357681
ENSMUSG00000029516	Cit	-0.952038	4.47991	-6.87942	0.000275228	0.00179433
ENSMUSG00000039910	Cited2	1.2961	6.1415	6.2521	0.000485935	0.0027687
ENSMUSG00000046841	Ckap4	4.42205	3.46037	16.1712	1.17551e-06	4.08472e-05
ENSMUSG00000064302	Clasp1	-0.737509	5.98037	-5.93381	0.000659167	0.00347955
ENSMUSG00000027884	Clcc1	0.610509	5.53148	6.13033	0.000545312	0.00302826
ENSMUSG00000040663	Clcf1	-1.59742	5.59363	-16.2911	1.11948e-06	3.976e-05
ENSMUSG00000029862	Clcn1	-6.89982	-0.410886	-6.77941	0.000300514	0.00190817
ENSMUSG00000022843	Clcn2	-1.77749	2.23475	-5.46522	0.00105558	0.00503378
ENSMUSG00000004317	Clcn5	1.30794	4.72289	7.17294	0.000213857	0.00149365
ENSMUSG00000036636	Clcn7	0.597627	6.32555	3.8348	0.00685317	0.0210246
ENSMUSG00000022744	Cldn25	0.910199	5.74568	9.44146	3.87891e-05	0.000414777
ENSMUSG00000000318	Clec10a	6.32923	5.78458	43.1715	1.63966e-09	1.41317e-06
ENSMUSG00000053063	Clec12a	4.22379	7.07477	51.997	4.67648e-10	1.41317e-06
ENSMUSG00000049037	Clec4a1	1.49251	8.01368	15.5284	1.5367e-06	4.84547e-05
ENSMUSG00000030148	Clec4a2	1.37583	6.5723	17.1449	7.98235e-07	3.29699e-05
ENSMUSG00000043832	Clec4a3	3.64017	7.27476	37.2397	4.43856e-09	2.28628e-06
ENSMUSG00000059639	Clec4a4	-4.89088	4.36674	-16.4091	1.06728e-06	3.88672e-05
ENSMUSG00000030147	Clec4b1	4.06856	5.11917	16.2766	1.12607e-06	3.98844e-05
ENSMUSG00000030144	Clec4d	8.0432	-1.01522	7.18727	0.000211283	0.00148208
ENSMUSG00000030142	Clec4e	9.09492	-1.39154	7.8465	0.000123497	0.000980694
ENSMUSG00000023349	Clec4n	1.40263	4.97271	7.314	0.000189989	0.001378
ENSMUSG00000029915	Clec5a	3.98527	2.92058	13.3601	4.12944e-06	8.71205e-05
ENSMUSG00000079293	Clec7a	3.06845	7.15118	24.8864	6.6559e-08	7.81148e-06
ENSMUSG00000046080	Clec9a	2.71308	4.84043	16.8384	8.99555e-07	3.52408e-05
ENSMUSG00000022125	Cln5	0.730826	5.58108	6.65273	0.000336391	0.00207682
ENSMUSG00000032245	Cln6	2.06511	4.64807	13.8568	3.25116e-06	7.42598e-05
ENSMUSG00000002981	Clptm1	-0.695834	7.59322	-9.50144	3.72622e-05	0.000404132
ENSMUSG00000042489	Clspn	-1.13875	3.88746	-6.07072	0.000577325	0.00316123
ENSMUSG00000039953	Clstn1	-2.33314	4.57354	-17.4085	7.21429e-07	3.19595e-05
ENSMUSG00000028478	Clta	0.710646	7.93203	10.5333	1.92966e-05	0.000251986
ENSMUSG00000022037	Clu	3.29072	1.90133	4.46913	0.00316209	0.0116399
ENSMUSG00000020741	Cluh	0.989477	6.4434	8.80638	6.01957e-05	0.000569699
ENSMUSG00000016756	Cmah	3.06667	1.61404	5.04618	0.00164702	0.00713561
ENSMUSG00000042190	Cmklr1	5.10071	3.90276	14.487	2.42767e-06	6.23378e-05
ENSMUSG00000020638	Cmpk2	0.940921	5.36731	7.19952	0.000209112	0.00146942
ENSMUSG00000031875	Cmtm3	2.02207	6.08593	19.7548	3.11322e-07	1.82681e-05
ENSMUSG00000096188	Cmtm4	1.19603	3.22166	3.72019	0.00793233	0.0236343
ENSMUSG00000032434	Cmtm6	0.805577	7.85947	9.72146	3.22183e-05	0.000361561
ENSMUSG00000032436	Cmtm7	2.22823	5.83203	10.7105	1.73366e-05	0.000232257
ENSMUSG00000047419	Cmya5	-3.91618	1.33794	-5.5293	0.00098816	0.00477746
ENSMUSG00000024644	Cndp2	1.357	7.30204	16.3984	1.07188e-06	3.89248e-05
ENSMUSG00000026114	Cnga3	-8.70117	-0.833675	-8.6042	6.96338e-05	0.000640744
ENSMUSG00000015759	Cnih1	0.827518	5.28865	6.67714	0.000329119	0.00203972
ENSMUSG00000062169	Cnih4	0.888308	5.26411	8.15669	9.71514e-05	0.000817691
ENSMUSG00000015202	Cnksr3	1.50449	3.41451	7.2611	0.000198568	0.00142221
ENSMUSG00000004665	Cnn2	-0.897479	8.94287	-11.6017	1.03507e-05	0.00015836
ENSMUSG00000053931	Cnn3	2.23139	1.20397	4.65561	0.00254779	0.00989124
ENSMUSG00000031601	Cnot7	-0.6266	5.93093	-7.06832	0.000233757	0.00158048
ENSMUSG00000033159	Cnppd1	0.61833	6.6637	8.07336	0.000103541	0.000855322
ENSMUSG00000025381	Cnpy2	0.763731	4.59353	4.49851	0.00305523	0.011324
ENSMUSG00000038070	Cntln	-0.593098	4.94237	-3.95268	0.00590841	0.0186952
ENSMUSG00000057110	Cntrl	-1.13416	7.82859	-13.4817	3.8917e-06	8.48429e-05
ENSMUSG00000032782	Cntrob	-0.83589	4.70861	-4.87542	0.00198787	0.00821586
ENSMUSG00000024330	Col11a2	-1.17305	2.94954	-3.54163	0.0100011	0.0282795
ENSMUSG00000025064	Col17a1	-1.82062	3.05477	-5.10713	0.00154157	0.00678026
ENSMUSG00000063564	Col23a1	-3.75733	1.85699	-9.43058	3.90737e-05	0.000416786
ENSMUSG00000031502	Col4a1	4.88244	-0.141799	3.73059	0.00782708	0.0233657
ENSMUSG00000031503	Col4a2	5.21748	-1.28023	3.36845	0.0125783	0.0338282
ENSMUSG00000034807	Colgalt1	0.954136	7.42088	13.2569	4.34444e-06	8.97202e-05
ENSMUSG00000027163	Commd9	0.914671	3.3552	3.54832	0.00991383	0.0280881
ENSMUSG00000000326	Comt	1.32571	5.62494	11.9933	8.34613e-06	0.000137254
ENSMUSG00000019373	Cops3	-0.865957	4.94157	-7.13878	0.000220136	0.00152269
ENSMUSG00000025981	Coq10b	-0.913873	4.3864	-5.92647	0.000663911	0.00349757
ENSMUSG00000029319	Coq2	-0.689829	5.58811	-5.7277	0.000808164	0.00407169
ENSMUSG00000028337	Coro2a	-0.734394	7.55046	-10.7854	1.65764e-05	0.000224397
ENSMUSG00000039637	Coro7	0.751802	7.23862	9.52111	3.67764e-05	0.000400206
ENSMUSG00000042148	Cox10	0.696406	3.56823	3.43098	0.0115732	0.0316718
ENSMUSG00000046516	Cox17	-1.08164	3.86643	-5.94038	0.000654957	0.0034631
ENSMUSG00000035885	Cox8a	0.599822	6.20717	6.15042	0.000534974	0.00297853
ENSMUSG00000003617	Cp	2.14143	3.54382	10.8082	1.63523e-05	0.000222193
ENSMUSG00000020841	Cpd	1.75815	4.67019	11.1503	1.3378e-05	0.000190265
ENSMUSG00000034361	Cpne2	1.31585	4.87538	10.0088	2.67601e-05	0.000318265
ENSMUSG00000039007	Cpq	1.84319	3.40461	7.10086	0.000227351	0.00155266
ENSMUSG00000024900	Cpt1a	2.13948	6.73186	18.9638	4.08645e-07	2.21845e-05
ENSMUSG00000026616	Cr2	-4.17193	1.53834	-8.80045	6.04511e-05	0.000571698
ENSMUSG00000048200	Cracr2b	4.128	-0.421478	3.01575	0.020328	0.049445
ENSMUSG00000038002	Cramp1l	-0.687994	6.31567	-7.18056	0.000212484	0.00148808
ENSMUSG00000026853	Crat	2.04386	4.48997	11.2033	1.29744e-05	0.000185341
ENSMUSG00000027230	Creb3l1	6.11383	-1.76467	4.415	0.00336989	0.0122102
ENSMUSG00000038648	Creb3l2	1.16012	4.5464	8.40105	8.08478e-05	0.000714016
ENSMUSG00000053007	Creb5	4.70969	-0.69578	4.27233	0.00399378	0.0139056
ENSMUSG00000032652	Crebl2	-1.74455	5.35666	-11.461	1.12013e-05	0.000167561
ENSMUSG00000040713	Creg1	1.15704	7.16825	8.35988	8.33621e-05	0.000726216
ENSMUSG00000050967	Creg2	5.62075	-1.93144	3.46651	0.0110409	0.0304538
ENSMUSG00000023272	Creld2	0.782202	5.53602	7.50529	0.000162288	0.00121768
ENSMUSG00000024074	Crim1	2.93213	2.90449	10.3279	2.18946e-05	0.000276149
ENSMUSG00000006360	Crip1	3.30063	5.9601	16.7767	9.21706e-07	3.59994e-05
ENSMUSG00000031825	Crispld2	-3.96221	3.86322	-15.3786	1.63819e-06	4.98318e-05
ENSMUSG00000033467	Crlf2	0.842133	6.21341	10.1453	2.45414e-05	0.000299798
ENSMUSG00000017561	Crlf3	-0.73973	7.8013	-8.4938	7.54915e-05	0.000678189
ENSMUSG00000032431	Crtap	0.727733	3.77917	3.95766	0.0058718	0.0186101
ENSMUSG00000027936	Crtc2	-0.815112	6.43298	-8.36991	8.27414e-05	0.000723735
ENSMUSG00000020038	Cry1	-1.15403	4.58307	-7.8021	0.000127894	0.00100695
ENSMUSG00000066975	Cryba4	2.08332	0.287544	3.18568	0.0160965	0.0411174
ENSMUSG00000028199	Cryz	-0.906322	2.86064	-3.62661	0.00895137	0.0259761
ENSMUSG00000023044	Csad	0.849593	4.79224	6.40232	0.000422481	0.00246832
ENSMUSG00000014599	Csf1	2.43545	1.81014	5.62925	0.000892414	0.00441528
ENSMUSG00000024621	Csf1r	2.83334	9.63505	23.7438	9.11718e-08	9.35452e-06
ENSMUSG00000059326	Csf2ra	0.633095	8.84638	9.98083	2.72421e-05	0.000322515
ENSMUSG00000028859	Csf3r	3.16599	6.293	36.1586	5.41236e-09	2.49896e-06
ENSMUSG00000042042	Csgalnact2	-0.664041	7.59175	-8.22806	9.20328e-05	0.000783794
ENSMUSG00000073563	Csnk1g3	-1.18184	6.23346	-12.4801	6.44316e-06	0.000115924
ENSMUSG00000032911	Cspg4	6.90875	-2.48463	4.10754	0.00487791	0.016149
ENSMUSG00000056763	Cspp1	-0.6119	5.20885	-5.3165	0.00123285	0.00571265
ENSMUSG00000032515	Csrnp1	-1.0296	5.49964	-7.02141	0.000243354	0.00163094
ENSMUSG00000026421	Csrp1	-0.652844	6.29349	-5.53837	0.00097902	0.00474392
ENSMUSG00000027447	Cst3	1.54567	9.87321	26.094	4.84519e-08	6.66368e-06
ENSMUSG00000005054	Cstb	2.53163	4.68255	11.4919	1.10074e-05	0.000165277
ENSMUSG00000030970	Ctbp2	2.41261	4.58058	10.0711	2.57206e-05	0.000309597
ENSMUSG00000028189	Ctbs	0.757529	4.57958	5.29735	0.00125799	0.00580005
ENSMUSG00000026176	Ctdsp1	0.800285	6.31496	9.4652	3.81763e-05	0.000410662
ENSMUSG00000078429	Ctdsp2	0.876075	7.07285	9.4483	3.86114e-05	0.000413228
ENSMUSG00000047409	Ctdspl	3.81475	0.687159	3.10464	0.0179832	0.0448383
ENSMUSG00000037815	Ctnna1	0.655946	7.88518	9.11806	4.83569e-05	0.000481632
ENSMUSG00000028988	Ctnnbip1	1.81218	2.60319	5.01055	0.00171236	0.00733756
ENSMUSG00000034101	Ctnnd1	3.01569	1.75926	6.40706	0.000420635	0.00246397
ENSMUSG00000022240	Ctnnd2	-3.05722	5.95976	-22.0459	1.4973e-07	1.21493e-05
ENSMUSG00000005949	Ctns	0.637758	5.42469	4.8808	0.00197599	0.00817983
ENSMUSG00000031360	Ctps2	0.676243	5.37627	5.37729	0.00115665	0.00542177
ENSMUSG00000017760	Ctsa	0.710605	9.24508	12.0999	7.87989e-06	0.000131787
ENSMUSG00000021939	Ctsb	1.87387	10.1909	22.9524	1.1438e-07	1.07152e-05
ENSMUSG00000030560	Ctsc	2.1954	9.08304	35.3911	6.25316e-09	2.55981e-06
ENSMUSG00000007891	Ctsd	2.60618	8.44913	17.4836	7.01116e-07	3.14261e-05
ENSMUSG00000004552	Ctse	4.66116	0.256208	3.51343	0.0103785	0.0290607
ENSMUSG00000083282	Ctsf	2.49917	1.56451	3.26214	0.0145103	0.0378114
ENSMUSG00000028111	Ctsk	10.7221	0.443776	16.4937	1.03158e-06	3.78448e-05
ENSMUSG00000021477	Ctsl	2.36334	4.14333	11.9555	8.51869e-06	0.00013818
ENSMUSG00000038642	Ctss	1.33111	10.7629	21.6867	1.67096e-07	1.29354e-05
ENSMUSG00000062127	Cttnbp2nl	3.64778	4.77269	19.3281	3.6005e-07	2.0238e-05
ENSMUSG00000018378	Cuedc1	-3.31229	0.496316	-4.03767	0.00531612	0.0172724
ENSMUSG00000024194	Cuta	0.721356	4.91377	5.13831	0.00149054	0.00660375
ENSMUSG00000052336	Cx3cr1	4.69385	7.45179	47.2538	8.91587e-10	1.41317e-06
ENSMUSG00000034855	Cxcl10	2.30919	4.0876	10.9053	1.54376e-05	0.000213451
ENSMUSG00000061353	Cxcl12	5.77245	0.951773	4.15322	0.00461298	0.0155073
ENSMUSG00000018920	Cxcl16	2.01972	6.65028	14.8481	2.0646e-06	5.61247e-05
ENSMUSG00000058427	Cxcl2	8.5106	-1.6837	6.54055	0.00037224	0.0022533
ENSMUSG00000029417	Cxcl9	2.37738	4.87792	11.9715	8.44523e-06	0.000137789
ENSMUSG00000026180	Cxcr2	8.15662	0.0636159	5.50965	0.00100831	0.00485046
ENSMUSG00000050232	Cxcr3	1.99926	2.58197	5.56176	0.000955859	0.00465086
ENSMUSG00000045382	Cxcr4	0.975504	5.83962	8.1675	9.63557e-05	0.000812051
ENSMUSG00000051851	Cxx1c	-2.61194	3.07656	-9.3135	4.22908e-05	0.000438793
ENSMUSG00000034445	Cyb561a3	-1.89073	6.84983	-23.6755	9.29478e-08	9.46164e-06
ENSMUSG00000026456	Cyb5r1	2.141	5.16188	18.4248	4.95009e-07	2.47533e-05
ENSMUSG00000018042	Cyb5r3	-1.62051	7.15353	-22.0115	1.51303e-07	1.21493e-05
ENSMUSG00000015340	Cybb	1.80919	10.1545	22.2126	1.4238e-07	1.21098e-05
ENSMUSG00000030447	Cyfip1	0.955505	7.86975	13.9338	3.13518e-06	7.31775e-05
ENSMUSG00000020340	Cyfip2	-1.20923	7.61837	-13.5182	3.82339e-06	8.40626e-05
ENSMUSG00000020810	Cygb	-6.26595	0.131417	-5.26056	0.00130795	0.00598341
ENSMUSG00000036712	Cyld	-1.05159	7.70083	-12.2944	7.10363e-06	0.000124102
ENSMUSG00000049439	Cyp20a1	1.28398	4.13946	6.1648	0.000527711	0.00294443
ENSMUSG00000022818	Cyp2ab1	8.85038	-0.188357	9.12141	4.82448e-05	0.000480886
ENSMUSG00000048440	Cyp4f16	-2.40547	8.72493	-21.1689	1.96346e-07	1.40241e-05
ENSMUSG00000091586	Cyp4f17	-1.87805	1.69676	-4.64667	0.00257402	0.00997509
ENSMUSG00000003484	Cyp4f18	3.63144	5.81322	26.275	4.62587e-08	6.50035e-06
ENSMUSG00000062464	Cyp4f37	-4.76476	4.48714	-12.2422	7.30315e-06	0.000126131
ENSMUSG00000079057	Cyp4v3	0.807585	5.87827	8.11108	0.000100591	0.000838732
ENSMUSG00000052821	Cysltr1	4.35575	4.29889	16.0065	1.25782e-06	4.26801e-05
ENSMUSG00000046727	Cystm1	-4.45144	-1.03028	-3.81626	0.00701629	0.0214183
ENSMUSG00000018001	Cyth3	2.11648	4.97988	11.2142	1.28932e-05	0.000184384
ENSMUSG00000018008	Cyth4	0.742593	9.33004	11.4969	1.09765e-05	0.000165155
ENSMUSG00000026832	Cytip	-1.00007	8.77667	-13.4703	3.91328e-06	8.50268e-05
ENSMUSG00000019579	D17Wsu104e	0.617493	5.22252	4.78673	0.00219541	0.00882807
ENSMUSG00000025766	D3Ertd751e	-0.924661	3.37127	-4.34274	0.00367125	0.0130247
ENSMUSG00000090891	D6Ertd527e	-4.13922	2.01896	-11.4266	1.1421e-05	0.000169695
ENSMUSG00000050271	D8Ertd82e	5.24048	0.645767	4.5374	0.00291993	0.0109544
ENSMUSG00000033767	D930015E06Rik	-2.76063	8.47948	-30.4017	1.73754e-08	3.80727e-06
ENSMUSG00000052563	D930048N14Rik	-1.88574	1.53657	-4.55893	0.0028479	0.0107403
ENSMUSG00000034574	Daam1	0.793401	4.07651	3.15795	0.0167171	0.0423513
ENSMUSG00000022150	Dab2	5.03004	4.11986	29.6613	2.05053e-08	4.07835e-06
ENSMUSG00000026883	Dab2ip	-5.68747	4.47917	-25.8844	5.11444e-08	6.74689e-06
ENSMUSG00000055639	Dach1	6.09725	-2.1477	3.96323	0.00583111	0.0185129
ENSMUSG00000078794	Dact3	-1.90408	0.79369	-3.54485	0.00995901	0.0281852
ENSMUSG00000039952	Dag1	0.781673	4.88174	5.6585	0.000866402	0.00429975
ENSMUSG00000039206	Daglb	1.1475	6.2004	9.68356	3.30288e-05	0.000368736
ENSMUSG00000034371	Dak	-1.29315	3.88278	-6.77527	0.000301615	0.00191138
ENSMUSG00000019039	Dalrd3	-1.08909	5.64248	-8.17896	9.55203e-05	0.000807116
ENSMUSG00000042096	Dao	-3.97186	0.143543	-5.10687	0.00154199	0.00678026
ENSMUSG00000039168	Dap	0.761147	5.54981	5.64235	0.000880657	0.00436212
ENSMUSG00000021559	Dapk1	2.21198	5.52441	17.8776	6.04742e-07	2.85806e-05
ENSMUSG00000002307	Daxx	0.960085	6.24721	7.17922	0.000212724	0.00148895
ENSMUSG00000026385	Dbi	1.973	4.73328	14.8024	2.10692e-06	5.67464e-05
ENSMUSG00000034675	Dbn1	-2.55799	1.35568	-4.4207	0.00334733	0.0121694
ENSMUSG00000020476	Dbnl	-0.945539	8.25094	-14.9659	1.9599e-06	5.50816e-05
ENSMUSG00000059824	Dbp	-1.66187	2.37153	-3.37111	0.0125337	0.0337433
ENSMUSG00000020935	Dcakd	0.879394	3.87072	4.38181	0.00350479	0.0125617
ENSMUSG00000029366	Dck	0.753458	6.95928	9.57591	3.54605e-05	0.000390821
ENSMUSG00000022303	Dcstamp	6.04685	-1.3023	4.7954	0.00217408	0.00875592
ENSMUSG00000002109	Ddb2	-1.28714	3.33809	-5.23925	0.00133789	0.00608594
ENSMUSG00000037697	Ddhd1	-1.74545	7.21479	-15.2053	1.76528e-06	5.16324e-05
ENSMUSG00000025408	Ddit3	0.99398	3.78686	4.11636	0.00482551	0.0160206
ENSMUSG00000020108	Ddit4	-1.5945	6.45285	-9.71883	3.22737e-05	0.000361804
ENSMUSG00000003534	Ddr1	-1.98107	7.85745	-21.5593	1.73798e-07	1.32169e-05
ENSMUSG00000068290	Ddrgk1	0.660227	6.09462	6.54262	0.000371538	0.00225187
ENSMUSG00000069045	Ddx3y	-0.653695	7.20758	-9.01135	5.20835e-05	0.000507794
ENSMUSG00000054499	Dedd2	-1.11108	5.54454	-9.20838	4.54383e-05	0.000460271
ENSMUSG00000001482	Def8	0.63245	4.52082	4.60564	0.00269829	0.0103236
ENSMUSG00000035392	Dennd1a	1.57771	5.93966	13.9333	3.13585e-06	7.31775e-05
ENSMUSG00000002668	Dennd1c	-0.928108	7.39355	-11.6667	9.98263e-06	0.000154004
ENSMUSG00000038456	Dennd2a	2.18845	0.855955	3.79723	0.00718816	0.0218196
ENSMUSG00000007379	Dennd2c	1.09382	3.31618	4.70709	0.00240245	0.00945477
ENSMUSG00000036661	Dennd3	-4.33038	5.95619	-40.6083	2.47691e-09	1.88361e-06
ENSMUSG00000053641	Dennd4a	-1.65917	6.88939	-21.1846	1.95375e-07	1.40241e-05
ENSMUSG00000038024	Dennd4c	1.56223	4.78415	10.3579	2.14916e-05	0.000271519
ENSMUSG00000030313	Dennd5b	-2.31287	0.464403	-3.40041	0.0120532	0.0327293
ENSMUSG00000015377	Dennd6b	-1.65824	3.90035	-9.11412	4.84889e-05	0.000482575
ENSMUSG00000022419	Deptor	1.67208	5.3772	13.3747	4.10004e-06	8.70367e-05
ENSMUSG00000026502	Desi2	1.04874	4.804	7.38092	0.00017973	0.0013202
ENSMUSG00000038055	Dexi	-0.798706	5.84515	-7.14674	0.000218653	0.00151731
ENSMUSG00000028974	Dffa	-0.631563	5.11454	-4.54398	0.00289772	0.0108964
ENSMUSG00000029027	Dffb	-0.633106	3.61231	-3.28299	0.0141075	0.0370545
ENSMUSG00000000276	Dgke	-0.917077	4.17711	-5.6665	0.000859428	0.00427847
ENSMUSG00000022861	Dgkg	6.86602	0.985451	6.64237	0.000339532	0.00209421
ENSMUSG00000034731	Dgkh	2.19771	2.4329	5.39808	0.00113181	0.00532463
ENSMUSG00000040479	Dgkz	1.40219	7.39352	19.8526	3.01247e-07	1.80302e-05
ENSMUSG00000034926	Dhcr24	1.12669	5.11228	7.94211	0.000114598	0.000928851
ENSMUSG00000011382	Dhdh	1.19373	4.25487	7.39963	0.000176976	0.0013059
ENSMUSG00000066026	Dhrs3	1.86841	5.58419	17.519	6.91778e-07	3.138e-05
ENSMUSG00000018425	Dhx40	0.706448	6.00806	6.10766	0.000557243	0.00307209
ENSMUSG00000035051	Dhx57	-0.81361	6.46229	-8.40766	8.0452e-05	0.000712386
ENSMUSG00000029433	Diablo	-0.607754	5.01362	-4.51781	0.00298725	0.0111326
ENSMUSG00000022848	Dirc2	0.957942	4.17312	5.66427	0.000861364	0.00428297
ENSMUSG00000043051	Disc1	-0.782992	4.41592	-4.27979	0.00395817	0.0138039
ENSMUSG00000028031	Dkk2	-3.33531	1.36517	-7.03088	0.000241382	0.00162276
ENSMUSG00000031523	Dlc1	-4.22912	-0.277754	-3.34567	0.0129676	0.0346804
ENSMUSG00000022770	Dlg1	-0.815297	6.7323	-9.86452	2.93565e-05	0.000338555
ENSMUSG00000052572	Dlg2	-4.13795	1.33424	-9.37207	4.06453e-05	0.000427206
ENSMUSG00000020886	Dlg4	0.911321	3.40482	4.31846	0.00377912	0.0133206
ENSMUSG00000042388	Dlgap3	-8.15957	-0.944071	-7.43599	0.000171758	0.00127322
ENSMUSG00000061689	Dlgap4	-0.776138	6.80776	-9.40262	3.98159e-05	0.000421866
ENSMUSG00000027314	Dll4	-6.94968	-2.46416	-4.13989	0.0046886	0.0156788
ENSMUSG00000028610	Dmrtb1	-4.68928	1.12116	-6.23727	0.000492762	0.00279773
ENSMUSG00000030410	Dmwd	-2.0068	1.09362	-3.77909	0.00735618	0.0222406
ENSMUSG00000041268	Dmxl2	2.43332	2.86874	7.10947	0.00022569	0.00154469
ENSMUSG00000021879	Dnah12	6.49993	0.655384	7.61944	0.00014795	0.00113111
ENSMUSG00000005237	Dnah2	-0.838844	4.9427	-4.98079	0.00176917	0.00752106
ENSMUSG00000032285	Dnaja4	-2.35373	0.648504	-3.81684	0.00701112	0.0214076
ENSMUSG00000004460	Dnajb11	0.680874	7.15588	8.48973	7.57178e-05	0.000678834
ENSMUSG00000028035	Dnajb4	0.985001	3.28796	3.82724	0.00691921	0.021182
ENSMUSG00000014905	Dnajb9	0.591387	5.10616	4.19134	0.00440402	0.0149829
ENSMUSG00000022013	Dnajc15	0.683789	4.51222	4.45395	0.00321887	0.0118053
ENSMUSG00000038009	Dnajc22	-7.35871	0.322014	-7.54065	0.000157685	0.00119144
ENSMUSG00000021811	Dnajc9	-0.75143	5.13708	-6.63976	0.00034033	0.00209707
ENSMUSG00000019088	Dnase1l1	2.00241	5.5174	14.5401	2.37e-06	6.14783e-05
ENSMUSG00000025279	Dnase1l3	-4.10314	7.87941	-10.3052	2.22054e-05	0.00027898
ENSMUSG00000003812	Dnase2a	1.4334	6.10865	13.4945	3.86769e-06	8.45468e-05
ENSMUSG00000025195	Dnmbp	-0.916043	4.31538	-6.06406	0.000581026	0.00317611
ENSMUSG00000024871	Doc2g	-2.18014	2.36842	-7.17305	0.000213836	0.00149365
ENSMUSG00000058325	Dock1	3.2327	4.46676	21.8891	1.57041e-07	1.24554e-05
ENSMUSG00000038608	Dock10	-1.01093	10.193	-16.8811	8.84607e-07	3.48665e-05
ENSMUSG00000035954	Dock4	-0.898995	6.36951	-7.42448	0.00017339	0.00128238
ENSMUSG00000044447	Dock5	-1.62505	7.86148	-15.3819	1.63583e-06	4.98318e-05
ENSMUSG00000028556	Dock7	0.941181	6.29281	6.84399	0.0002839	0.00183147
ENSMUSG00000025558	Dock9	-2.83009	1.79863	-5.69678	0.000833623	0.0041707
ENSMUSG00000078440	Dohh	0.769932	4.95151	4.70114	0.00241877	0.00950313
ENSMUSG00000022102	Dok2	5.86479	2.80967	12.5069	6.3538e-06	0.000115029
ENSMUSG00000035711	Dok3	4.98691	4.26013	27.8119	3.15932e-08	5.04243e-06
ENSMUSG00000075419	Dolk	0.911894	3.52229	4.51491	0.00299737	0.0111639
ENSMUSG00000022960	Donson	-0.863468	4.97846	-5.97085	0.000635805	0.00339096
ENSMUSG00000035640	Dos	-1.42045	2.29518	-4.52212	0.00297231	0.0110994
ENSMUSG00000032123	Dpagt1	1.27926	4.49239	9.06145	5.02944e-05	0.000494078
ENSMUSG00000041035	Dpcd	0.692438	3.78118	3.22477	0.0152636	0.0394497
ENSMUSG00000053687	Dpep2	2.96695	4.27063	15.8344	1.35095e-06	4.44403e-05
ENSMUSG00000036815	Dpp10	-2.32041	1.75746	-4.28149	0.00395009	0.0137832
ENSMUSG00000035000	Dpp4	-1.07539	8.7215	-13.4924	3.87158e-06	8.45468e-05
ENSMUSG00000026958	Dpp7	0.828588	4.95258	6.94792	0.000259298	0.00171905
ENSMUSG00000046323	Dppa3	7.25126	-2.31337	4.55619	0.00285697	0.0107713
ENSMUSG00000022048	Dpysl2	1.05094	5.12394	8.55609	7.21204e-05	0.000658921
ENSMUSG00000009145	Dqx1	-1.08542	3.55551	-4.14994	0.00463148	0.0155315
ENSMUSG00000020057	Dram1	2.65382	3.94377	13.7687	3.39003e-06	7.68883e-05
ENSMUSG00000027900	Dram2	0.99619	6.15691	9.19732	4.57848e-05	0.000462426
ENSMUSG00000050272	Dscam	-6.68717	4.50541	-32.8697	1.02816e-08	3.08357e-06
ENSMUSG00000022898	Dscr3	0.722181	5.84775	7.46955	0.000167096	0.00124724
ENSMUSG00000039497	Dse	2.57036	6.41358	21.3329	1.8649e-07	1.37317e-05
ENSMUSG00000027635	Dsn1	-0.812765	3.27003	-3.54672	0.00993465	0.0281261
ENSMUSG00000015932	Dstn	0.731446	6.06431	7.61667	0.000148281	0.00113163
ENSMUSG00000090326	Dthd1	-6.82206	-1.49275	-5.1379	0.00149121	0.00660446
ENSMUSG00000037474	Dtl	-0.940021	4.20506	-5.47617	0.00104371	0.00498452
ENSMUSG00000071454	Dtnb	-0.939933	3.70502	-4.65191	0.00255863	0.00992736
ENSMUSG00000057531	Dtnbp1	0.991614	4.26092	4.37432	0.00353604	0.0126456
ENSMUSG00000029603	Dtx1	-9.44146	4.43581	-20.1612	2.71826e-07	1.68142e-05
ENSMUSG00000040415	Dtx3	-0.937782	4.98142	-7.3318	0.000187197	0.00136266
ENSMUSG00000039982	Dtx4	3.15493	4.37485	19.7456	3.12287e-07	1.82681e-05
ENSMUSG00000024190	Dusp1	0.7939	7.40657	3.10354	0.0180103	0.04488
ENSMUSG00000039384	Dusp10	-0.796483	3.51068	-3.97916	0.00571644	0.0182339
ENSMUSG00000026659	Dusp12	0.948792	3.6736	3.2608	0.0145367	0.0378586
ENSMUSG00000030203	Dusp16	-0.802676	5.96637	-9.13895	4.76632e-05	0.000476558
ENSMUSG00000027368	Dusp2	-1.03295	5.91914	-8.69049	6.54139e-05	0.000610593
ENSMUSG00000003518	Dusp3	2.84392	4.69693	11.4227	1.14461e-05	0.000169695
ENSMUSG00000034765	Dusp5	-1.22059	6.20418	-7.86666	0.000121557	0.000971413
ENSMUSG00000019960	Dusp6	1.44319	7.46486	13.6388	3.60732e-06	8.01295e-05
ENSMUSG00000027203	Dut	-0.784159	4.48234	-5.58074	0.000937525	0.00458293
ENSMUSG00000082691	Dynlt1-ps1	0.934844	4.2696	5.78279	0.000764943	0.00390673
ENSMUSG00000030345	Dyrk4	-2.66301	0.0522739	-3.31833	0.0134521	0.0356372
ENSMUSG00000042156	Dzip1	-5.89081	1.69766	-14.7516	2.15518e-06	5.74089e-05
ENSMUSG00000087177	E130307A14Rik	-0.997157	3.08907	-4.04475	0.00526978	0.0171434
ENSMUSG00000066170	E230001N04Rik	-4.55217	-0.749722	-4.96121	0.00180769	0.0076429
ENSMUSG00000035539	E230008N13Rik	-1.16466	1.93158	-3.26661	0.0144229	0.0376905
ENSMUSG00000051832	E230016K23Rik	7.75143	-0.684599	7.03005	0.000241553	0.00162276
ENSMUSG00000027490	E2f1	0.681425	4.77593	3.83783	0.00682691	0.020949
ENSMUSG00000022350	E430025E21Rik	0.874369	5.99592	5.72955	0.000806672	0.00406892
ENSMUSG00000072596	Ear2	2.08299	6.64122	14.2428	2.71468e-06	6.67213e-05
ENSMUSG00000031168	Ebp	0.693557	5.18232	4.00552	0.00553214	0.0177909
ENSMUSG00000025465	Echs1	0.614375	5.51133	5.70147	0.000829707	0.00415432
ENSMUSG00000028108	Ecm1	1.81513	2.03482	5.07105	0.00160304	0.00698956
ENSMUSG00000027699	Ect2	-0.935467	4.03253	-4.06771	0.00512263	0.016817
ENSMUSG00000035064	Eef2k	-2.5227	6.37152	-23.3405	1.02244e-07	1.00803e-05
ENSMUSG00000034210	Efcab14	-1.04897	6.56617	-10.6295	1.82027e-05	0.000240021
ENSMUSG00000024909	Efemp2	1.64093	0.958165	3.02708	0.0200117	0.0487583
ENSMUSG00000001300	Efnb2	-2.53894	1.29655	-5.11521	0.00152816	0.00673404
ENSMUSG00000035105	Egln3	4.41691	-0.953227	4.02663	0.00538926	0.0174399
ENSMUSG00000037868	Egr2	2.32641	3.52092	7.97042	0.000112104	0.000910926
ENSMUSG00000027293	Ehd4	2.505	7.72023	32.1772	1.18643e-08	3.33439e-06
ENSMUSG00000057561	Eif1a	0.742276	5.59722	5.87067	0.00070125	0.0036482
ENSMUSG00000027810	Eif2a	0.78076	6.28277	7.78895	0.00012923	0.00101558
ENSMUSG00000005102	Eif2ak4	-0.945214	5.98059	-10.3189	2.20169e-05	0.000277337
ENSMUSG00000027236	Eif3j1	1.20822	3.11554	4.24596	0.00412251	0.0142446
ENSMUSG00000093661	Eif4e3	0.872367	5.75057	8.22243	9.24247e-05	0.000786097
ENSMUSG00000031490	Eif4ebp1	1.35224	4.42411	8.75323	6.25279e-05	0.000587045
ENSMUSG00000020454	Eif4enif1	-0.681119	6.47518	-8.29627	8.74243e-05	0.000754366
ENSMUSG00000043618	Eif5al3-ps	0.719095	3.16206	3.14342	0.0170524	0.043032
ENSMUSG00000041112	Elmo1	-1.25945	8.02085	-18.3489	5.08772e-07	2.52977e-05
ENSMUSG00000041220	Elovl6	1.93769	2.76187	5.93798	0.000656492	0.00346696
ENSMUSG00000021728	Emb	1.34435	7.70842	15.7718	1.38675e-06	4.52724e-05
ENSMUSG00000029163	Emilin1	4.63118	3.37775	14.9177	2.00195e-06	5.57785e-05
ENSMUSG00000024053	Emilin2	4.99457	5.8342	35.4046	6.23713e-09	2.55981e-06
ENSMUSG00000040811	Eml2	-0.719751	5.26635	-4.3875	0.00348125	0.0124946
ENSMUSG00000071647	Eml3	-1.27033	7.51867	-17.6768	6.5184e-07	3.00964e-05
ENSMUSG00000032624	Eml4	-0.628328	6.80813	-7.21382	0.000206607	0.00146277
ENSMUSG00000051166	Eml5	-3.57957	3.71477	-13.107	4.67968e-06	9.36516e-05
ENSMUSG00000030208	Emp1	8.07125	-0.2901	7.23533	0.000202904	0.00144765
ENSMUSG00000040212	Emp3	1.08611	6.62273	13.9786	3.06979e-06	7.21567e-05
ENSMUSG00000004730	Emr1	1.11742	9.29402	9.05265	5.06035e-05	0.000496737
ENSMUSG00000032915	Emr4	3.17119	7.93525	14.3248	2.61415e-06	6.48383e-05
ENSMUSG00000037419	Endod1	1.05085	5.17666	9.15807	4.70384e-05	0.000471771
ENSMUSG00000026814	Eng	3.47315	3.31695	12.9832	4.9792e-06	9.76799e-05
ENSMUSG00000033857	Engase	2.19283	4.33453	12.7603	5.57509e-06	0.000105219
ENSMUSG00000013155	Enkd1	-1.40521	1.68308	-3.52493	0.0102228	0.0287117
ENSMUSG00000063524	Eno1	0.914577	6.61914	11.9762	8.42372e-06	0.000137789
ENSMUSG00000060600	Eno3	-1.20057	6.81683	-6.15859	0.000530836	0.00296059
ENSMUSG00000037370	Enpp1	2.38819	1.6118	4.23573	0.0041737	0.0143657
ENSMUSG00000022425	Enpp2	-5.42021	-0.534005	-4.73427	0.00232944	0.0092349
ENSMUSG00000023961	Enpp4	1.23366	4.76625	5.98314	0.000628262	0.00336284
ENSMUSG00000024140	Epas1	4.80885	-0.839377	3.75182	0.00761706	0.0228715
ENSMUSG00000027624	Epb4.1l1	2.56333	2.7222	9.50769	3.7107e-05	0.000402787
ENSMUSG00000023216	Epb4.2	3.99471	-0.356587	3.29188	0.0139395	0.0366877
ENSMUSG00000045394	Epcam	-5.31066	1.53101	-12.4385	6.58495e-06	0.000117583
ENSMUSG00000038776	Ephx1	2.41818	2.83254	5.52159	0.000996016	0.00481004
ENSMUSG00000022040	Ephx2	-3.83618	0.000720967	-5.44929	0.00107314	0.00510995
ENSMUSG00000025504	Eps8l2	-2.68896	0.633163	-3.5848	0.0094521	0.0270826
ENSMUSG00000005881	Ergic3	0.804635	6.39388	7.69615	0.000139122	0.00107634
ENSMUSG00000033423	Eri3	0.671254	4.66633	4.15028	0.00462953	0.0155315
ENSMUSG00000051978	Erich1	0.671027	3.60358	3.10772	0.0179074	0.0447183
ENSMUSG00000025198	Erlin1	-0.709274	6.78622	-8.75887	6.22757e-05	0.000585746
ENSMUSG00000028644	Ermap	3.34684	-0.145709	4.39229	0.00346155	0.012455
ENSMUSG00000020715	Ern1	0.69765	6.95083	8.82901	5.92331e-05	0.000563063
ENSMUSG00000057069	Ero1lb	0.777654	5.86656	7.94561	0.000114286	0.000926907
ENSMUSG00000029616	Erp29	0.890216	7.91203	12.9317	5.10996e-06	9.88945e-05
ENSMUSG00000028343	Erp44	0.607049	6.26699	6.80136	0.000294748	0.00188173
ENSMUSG00000028967	Errfi1	-1.16951	4.47728	-7.33072	0.000187365	0.00136312
ENSMUSG00000001946	Esam	-7.55083	2.73314	-18.5585	4.71772e-07	2.40624e-05
ENSMUSG00000024293	Esco1	-0.861007	6.04397	-8.33646	8.48325e-05	0.000737039
ENSMUSG00000022034	Esco2	-1.19578	3.49513	-4.80828	0.00214284	0.00867091
ENSMUSG00000021996	Esd	0.727448	5.69049	5.22694	0.00135554	0.00614891
ENSMUSG00000058290	Espl1	-1.62153	5.88237	-17.6181	6.66378e-07	3.05494e-05
ENSMUSG00000028943	Espn	2.04812	2.0527	5.81205	0.000743038	0.00381039
ENSMUSG00000019768	Esr1	1.4639	2.8048	5.16161	0.00145365	0.00647605
ENSMUSG00000025366	Esyt1	1.24973	7.51264	16.1816	1.17053e-06	4.08472e-05
ENSMUSG00000021171	Esyt2	-0.717481	6.30568	-6.9863	0.000250828	0.00167651
ENSMUSG00000037681	Esyt3	-6.04079	-1.88339	-4.11041	0.00486081	0.0161269
ENSMUSG00000064254	Ethe1	1.45346	3.69648	4.40534	0.00340854	0.0123059
ENSMUSG00000030275	Etnk1	-1.29738	8.27492	-16.3364	1.09911e-06	3.94704e-05
ENSMUSG00000032035	Ets1	-0.78115	3.81428	-3.56297	0.00972555	0.0276516
ENSMUSG00000022895	Ets2	3.48271	2.96594	10.3998	2.09416e-05	0.000267259
ENSMUSG00000013089	Etv5	1.81883	4.35523	8.62091	6.87927e-05	0.000635252
ENSMUSG00000050212	Eva1b	-0.771226	2.97254	-3.15749	0.0167276	0.0423697
ENSMUSG00000011831	Evi5	0.845837	5.24239	4.63575	0.00260647	0.0100526
ENSMUSG00000011832	Evi5l	-0.792076	4.19887	-3.07422	0.0187513	0.0463336
ENSMUSG00000028629	Exo5	0.782558	3.47976	3.6966	0.00817664	0.0242005
ENSMUSG00000061286	Exosc5	-0.713039	5.70295	-7.20943	0.000207373	0.00146426
ENSMUSG00000061731	Ext1	2.26478	5.52786	19.1092	3.88404e-07	2.13322e-05
ENSMUSG00000028838	Extl1	-1.49842	2.13899	-4.57203	0.00280503	0.0106344
ENSMUSG00000027963	Extl2	1.33678	2.86329	5.02674	0.00168233	0.00724269
ENSMUSG00000021978	Extl3	0.737997	6.96773	10.2961	2.23302e-05	0.000279733
ENSMUSG00000010461	Eya4	6.31146	-2.78327	3.37721	0.012432	0.0335325
ENSMUSG00000029687	Ezh2	-1.22596	5.9468	-11.1354	1.34934e-05	0.000191312
ENSMUSG00000052397	Ezr	-0.907593	7.92697	-14.3328	2.60459e-06	6.47541e-05
ENSMUSG00000031444	F10	6.68834	0.85593	6.76385	0.000304678	0.00192141
ENSMUSG00000038235	F11r	1.39231	4.6583	4.51664	0.00299134	0.0111447
ENSMUSG00000039109	F13a1	12.4767	1.67802	15.5408	1.5286e-06	4.83173e-05
ENSMUSG00000031443	F7	7.51338	-2.18231	4.88707	0.00196227	0.00813605
ENSMUSG00000052125	F730043M19Rik	-2.25625	4.30462	-12.241	7.30756e-06	0.000126131
ENSMUSG00000031138	F9	-1.07761	2.17155	-3.33931	0.0130786	0.0348979
ENSMUSG00000034171	Faah	-5.43528	0.04122	-3.96403	0.00582529	0.0185126
ENSMUSG00000062515	Fabp4	4.11482	1.87717	5.55667	0.000960842	0.00466808
ENSMUSG00000010663	Fads1	1.77315	4.73882	11.8083	9.23184e-06	0.000145956
ENSMUSG00000044788	Fads6	-0.903244	4.34058	-6.18166	0.000519341	0.00290555
ENSMUSG00000032463	Faim	0.599667	4.47619	3.79644	0.00719537	0.021831
ENSMUSG00000020846	Fam101b	2.92773	1.09952	4.42614	0.00332592	0.0121069
ENSMUSG00000039157	Fam102a	-0.923508	5.39511	-7.59263	0.000151184	0.00114903
ENSMUSG00000040339	Fam102b	1.1772	6.50274	8.6676	6.65044e-05	0.000618984
ENSMUSG00000026655	Fam107b	-0.936599	8.87135	-9.75724	3.14738e-05	0.000356299
ENSMUSG00000049687	Fam109b	3.90487	0.229126	3.18419	0.0161294	0.041177
ENSMUSG00000049119	Fam110b	5.32048	-1.58061	3.65594	0.00861736	0.025182
ENSMUSG00000024691	Fam111a	1.17467	7.91622	17.5335	6.87993e-07	3.13285e-05
ENSMUSG00000029185	Fam114a1	0.998624	3.81278	4.96824	0.00179376	0.00760068
ENSMUSG00000038893	Fam117a	0.696412	4.88398	5.64698	0.00087654	0.00434506
ENSMUSG00000041040	Fam117b	0.618271	6.28819	6.43935	0.000408309	0.00240675
ENSMUSG00000050471	Fam118b	0.682047	4.84553	5.57716	0.000940955	0.00459564
ENSMUSG00000026483	Fam129a	1.19498	8.41595	12.9526	5.05641e-06	9.85472e-05
ENSMUSG00000026796	Fam129b	3.54737	4.72018	23.1882	1.06822e-07	1.00803e-05
ENSMUSG00000043243	Fam129c	-0.986019	3.38504	-4.67771	0.00248425	0.00968989
ENSMUSG00000050821	Fam131a	-1.46828	3.60829	-7.16661	0.000215005	0.00149762
ENSMUSG00000049339	Fam134a	0.773446	6.23983	6.57148	0.000361942	0.00220716
ENSMUSG00000026153	Fam135a	-2.40398	3.37793	-11.2807	1.24102e-05	0.000179904
ENSMUSG00000036501	Fam13b	-0.672054	6.59705	-8.08393	0.000102705	0.000850588
ENSMUSG00000044465	Fam160a2	5.96439	0.876019	4.69096	0.00244697	0.0095775
ENSMUSG00000035095	Fam167a	-4.89218	1.42852	-11.0388	1.4274e-05	0.000198852
ENSMUSG00000074071	Fam169b	-3.09051	0.226144	-4.57664	0.0027901	0.0105902
ENSMUSG00000026767	Fam188a	0.756436	4.89507	5.57559	0.000942458	0.00459777
ENSMUSG00000032657	Fam189b	-0.822771	3.88291	-4.19637	0.0043772	0.0149094
ENSMUSG00000025732	Fam195a	2.90731	0.759262	4.7782	0.0022166	0.00889668
ENSMUSG00000033799	Fam208b	-1.00619	6.66924	-12.4483	6.55119e-06	0.000117142
ENSMUSG00000025854	Fam20c	5.91576	1.87033	12.2183	7.39649e-06	0.000127326
ENSMUSG00000027495	Fam210b	0.717507	3.97651	3.53676	0.0100652	0.0283887
ENSMUSG00000042106	Fam212a	4.43073	0.0697573	3.50654	0.010473	0.0292745
ENSMUSG00000029059	Fam213b	2.12506	4.05984	10.9536	1.50045e-05	0.000208132
ENSMUSG00000034858	Fam214a	-0.602637	5.1537	-4.06623	0.00513199	0.0168349
ENSMUSG00000036002	Fam214b	1.45582	4.77371	10.434	2.05061e-05	0.000263521
ENSMUSG00000029463	Fam216a	-1.72893	0.809778	-3.28435	0.0140817	0.0370016
ENSMUSG00000028439	Fam219a	0.966479	3.31446	3.05982	0.019127	0.0470102
ENSMUSG00000046031	Fam26f	2.31793	5.42035	12.2507	7.26996e-06	0.000125987
ENSMUSG00000041471	Fam35a	-1.07639	4.7483	-8.07987	0.000103025	0.000852152
ENSMUSG00000029672	Fam3c	0.758498	5.1476	5.98946	0.000624421	0.00334899
ENSMUSG00000032265	Fam46a	2.11695	7.08696	15.3606	1.65085e-06	4.98546e-05
ENSMUSG00000020589	Fam49a	-1.18805	8.99129	-11.4384	1.13451e-05	0.000169169
ENSMUSG00000039985	Fam60a	-1.42888	2.54431	-4.18235	0.0044523	0.0150995
ENSMUSG00000038712	Fam63a	1.40221	3.82359	7.45765	0.000168733	0.00125583
ENSMUSG00000036006	Fam65b	-2.01756	5.81072	-16.1454	1.18801e-06	4.08472e-05
ENSMUSG00000054942	Fam73a	-1.65686	3.69554	-6.23262	0.000494926	0.00280878
ENSMUSG00000050592	Fam78a	1.13621	5.18436	10.14	2.46244e-05	0.000300325
ENSMUSG00000060568	Fam78b	4.95085	-0.710321	4.22597	0.00422316	0.0144973
ENSMUSG00000022408	Fam83f	5.07618	1.91139	8.34769	8.41241e-05	0.000731868
ENSMUSG00000022544	Fam86	0.602949	3.76932	3.26494	0.0144555	0.0377448
ENSMUSG00000043068	Fam89a	-2.05025	1.57007	-3.26249	0.0145035	0.0378104
ENSMUSG00000032815	Fanca	-0.801066	3.90602	-4.55931	0.00284666	0.0107403
ENSMUSG00000021461	Fancc	-0.628995	3.86058	-3.06422	0.0190114	0.0467972
ENSMUSG00000034023	Fancd2	-0.728386	3.51291	-3.25846	0.0145827	0.0379412
ENSMUSG00000034066	Farp2	1.14255	2.19951	3.4747	0.0109222	0.0302229
ENSMUSG00000000817	Fasl	-6.88627	-0.741701	-5.26676	0.00129938	0.0059492
ENSMUSG00000025153	Fasn	-0.765655	7.06267	-10.1366	2.46769e-05	0.000300681
ENSMUSG00000055333	Fat2	-4.82689	0.226965	-3.91181	0.00621875	0.0194852
ENSMUSG00000046865	Fbl	0.970293	3.44369	4.76596	0.00224741	0.00898964
ENSMUSG00000006219	Fblim1	3.52772	1.91404	5.7476	0.000792241	0.00401336
ENSMUSG00000043323	Fbrsl1	-1.45729	8.26103	-14.927	1.99382e-06	5.5672e-05
ENSMUSG00000032898	Fbxo21	-0.702417	4.59053	-4.81232	0.00213314	0.00864761
ENSMUSG00000022184	Fbxo4	4.04223	2.19159	9.73625	3.19082e-05	0.000360198
ENSMUSG00000047746	Fbxo40	-2.78513	-0.138296	-3.78502	0.00730077	0.0220937
ENSMUSG00000035764	Fbxo45	-0.90756	5.33406	-7.19178	0.000210481	0.00147761
ENSMUSG00000028086	Fbxw7	-0.843344	4.97832	-7.11828	0.000224004	0.00153711
ENSMUSG00000058715	Fcer1g	1.58138	8.63577	23.806	8.95894e-08	9.26569e-06
ENSMUSG00000005540	Fcer2a	1.7028	1.95069	4.64449	0.00258046	0.00998807
ENSMUSG00000015947	Fcgr1	5.99174	4.85416	8.76573	6.19704e-05	0.000583931
ENSMUSG00000026656	Fcgr2b	5.04514	7.37289	53.1115	4.05292e-10	1.41317e-06
ENSMUSG00000059498	Fcgr3	4.76833	5.84304	13.6612	3.56883e-06	7.96854e-05
ENSMUSG00000059089	Fcgr4	3.66025	6.20181	15.3557	1.65436e-06	4.98546e-05
ENSMUSG00000003420	Fcgrt	1.66673	6.66696	20.2441	2.64488e-07	1.67038e-05
ENSMUSG00000070000	Fcho1	-0.692129	5.99176	-5.66014	0.00086497	0.00429429
ENSMUSG00000041685	Fcho2	0.618761	7.00801	6.16973	0.000525248	0.00293322
ENSMUSG00000030691	Fchsd2	-1.40625	6.2254	-15.1112	1.839e-06	5.30171e-05
ENSMUSG00000059994	Fcrl1	-1.56302	5.89254	-7.39427	0.000177759	0.00130944
ENSMUSG00000048031	Fcrl5	3.46134	4.05186	5.20916	0.00138148	0.00623815
ENSMUSG00000070524	Fcrlb	3.38555	1.55142	7.77752	0.000130404	0.00102298
ENSMUSG00000015852	Fcrls	9.63901	-1.1195	9.26187	4.38048e-05	0.000449094
ENSMUSG00000032051	Fdx1	-1.89931	2.39253	-3.03287	0.0198522	0.0484518
ENSMUSG00000079677	Fdx1l	1.2226	3.4159	4.10301	0.00490507	0.0162222
ENSMUSG00000024588	Fech	0.959791	4.842	6.19787	0.000511429	0.00287093
ENSMUSG00000033319	Fem1c	-1.12442	7.42022	-10.628	1.82199e-05	0.000240021
ENSMUSG00000056121	Fez2	1.45399	4.33482	7.18116	0.000212377	0.00148808
ENSMUSG00000044453	Ffar1	-4.9068	2.47631	-16.9962	8.45668e-07	3.38653e-05
ENSMUSG00000051314	Ffar2	-5.83959	6.35874	-20.8672	2.1608e-07	1.4859e-05
ENSMUSG00000022788	Fgd4	4.68565	4.08978	14.143	2.84302e-06	6.84444e-05
ENSMUSG00000020021	Fgd6	3.99954	0.845523	5.62443	0.000896792	0.00443185
ENSMUSG00000069135	Fgfr1op	-0.811196	4.68836	-5.33164	0.00121335	0.00564658
ENSMUSG00000054252	Fgfr3	-2.39914	0.889338	-3.64502	0.00874008	0.0254601
ENSMUSG00000028874	Fgr	-0.594152	9.0316	-7.64678	0.000144734	0.00111157
ENSMUSG00000051435	Fhad1	-1.18532	2.50205	-3.74108	0.00772254	0.023089
ENSMUSG00000041842	Fhdc1	6.53858	-1.92703	4.66074	0.00253288	0.00983925
ENSMUSG00000032643	Fhl3	-1.02506	4.62299	-6.19954	0.000510623	0.00286826
ENSMUSG00000095440	Fignl2	6.88867	-2.49467	4.08233	0.00503129	0.0165972
ENSMUSG00000043336	Filip1l	-1.41628	8.25714	-11.1315	1.35243e-05	0.000191503
ENSMUSG00000032966	Fkbp1a	0.726117	5.71419	6.20578	0.000507617	0.00285946
ENSMUSG00000020635	Fkbp1b	5.56774	0.465278	4.65019	0.00256366	0.0099439
ENSMUSG00000056629	Fkbp2	1.37388	4.86007	9.82936	3.0032e-05	0.000344808
ENSMUSG00000032633	Flcn	0.737799	6.18675	7.85702	0.00012248	0.000976223
ENSMUSG00000016087	Fli1	0.80168	6.22463	7.22387	0.000204867	0.00145603
ENSMUSG00000031328	Flna	0.838308	10.5151	11.9855	8.38105e-06	0.000137326
ENSMUSG00000025278	Flnb	-3.21517	7.90634	-22.0244	1.50708e-07	1.21493e-05
ENSMUSG00000059714	Flot1	-0.787664	5.85924	-7.7467	0.000133632	0.00104323
ENSMUSG00000029648	Flt1	7.00388	0.977679	6.73898	0.000311472	0.00195606
ENSMUSG00000042817	Flt3	-1.34682	8.58584	-16.8491	8.95779e-07	3.51995e-05
ENSMUSG00000089989	Flt3l	-1.06397	3.57012	-5.50326	0.00101496	0.00486882
ENSMUSG00000036053	Fmnl2	0.985934	5.60457	5.80157	0.0007508	0.00384714
ENSMUSG00000023008	Fmnl3	0.932714	5.35777	8.61562	6.90577e-05	0.000636789
ENSMUSG00000026193	Fn1	6.44423	4.4627	9.40221	3.98268e-05	0.000421866
ENSMUSG00000039735	Fnbp1l	4.26107	3.81894	17.41	7.21034e-07	3.19595e-05
ENSMUSG00000071984	Fndc1	5.3098	0.0421767	5.59372	0.000925211	0.00453933
ENSMUSG00000033487	Fndc3a	0.883466	7.06063	7.83547	0.000124572	0.000986606
ENSMUSG00000039286	Fndc3b	2.13075	5.13652	14.3503	2.58374e-06	6.43595e-05
ENSMUSG00000001334	Fndc5	-9.13648	-1.37076	-8.03116	0.000106959	0.000878502
ENSMUSG00000061175	Fnip2	2.48811	5.04676	13.565	3.7379e-06	8.24634e-05
ENSMUSG00000021250	Fos	2.79992	8.55094	8.99884	5.25412e-05	0.000511485
ENSMUSG00000003545	Fosb	2.25148	6.08507	6.49684	0.000387359	0.00231627
ENSMUSG00000029135	Fosl2	3.35068	5.02953	18.6377	4.58602e-07	2.3723e-05
ENSMUSG00000003154	Foxj2	0.852057	6.25701	8.30931	8.65738e-05	0.000748646
ENSMUSG00000001517	Foxm1	-0.62992	4.4136	-4.14146	0.00467961	0.0156609
ENSMUSG00000023991	Foxp4	-1.26369	6.01187	-13.3074	4.23774e-06	8.85066e-05
ENSMUSG00000074397	Foxr1	-6.07788	-1.85038	-4.40109	0.00342574	0.0123571
ENSMUSG00000016552	Foxred2	1.63515	5.30076	10.6049	1.84756e-05	0.000242983
ENSMUSG00000009566	Fpgs	0.944572	3.05552	3.96705	0.00580338	0.0184612
ENSMUSG00000045551	Fpr1	3.61097	1.79529	4.85068	0.00204346	0.00839197
ENSMUSG00000052270	Fpr2	4.18352	2.78216	7.80978	0.000127121	0.00100147
ENSMUSG00000054237	Fra10ac1	-0.590915	4.11871	-3.47157	0.0109674	0.0303026
ENSMUSG00000026657	Frmd4a	1.43033	6.4503	15.2813	1.70822e-06	5.05351e-05
ENSMUSG00000030064	Frmd4b	2.0946	6.73757	23.2232	1.0575e-07	1.00803e-05
ENSMUSG00000027238	Frmd5	-11.5525	-0.162733	-15.4826	1.56696e-06	4.84634e-05
ENSMUSG00000033386	Frrs1	1.88457	5.20597	16.7051	9.4817e-07	3.64119e-05
ENSMUSG00000056602	Fry	1.03131	4.03007	3.37235	0.0125129	0.0337013
ENSMUSG00000070733	Fryl	-1.06522	7.5424	-15.8816	1.32463e-06	4.40227e-05
ENSMUSG00000029581	Fscn1	-1.43677	7.12913	-16.9407	8.642e-07	3.42711e-05
ENSMUSG00000024661	Fth1	1.42801	10.5433	21.3968	1.82801e-07	1.35819e-05
ENSMUSG00000050708	Ftl1	2.04026	7.25057	8.00468	0.000109168	0.000893318
ENSMUSG00000055932	Fto	0.621345	5.40374	5.43593	0.00108812	0.00515925
ENSMUSG00000033703	Fuk	-1.075	4.28756	-5.7296	0.000806628	0.00406892
ENSMUSG00000025466	Fuom	2.36298	0.592763	4.10765	0.00487724	0.016149
ENSMUSG00000030530	Furin	1.29443	6.73317	15.3806	1.63678e-06	4.98318e-05
ENSMUSG00000030795	Fus	-0.650681	8.62993	-7.13815	0.000220254	0.00152269
ENSMUSG00000039357	Fut11	0.783072	4.46195	5.33957	0.00120328	0.00560846
ENSMUSG00000049307	Fut4	-0.933568	6.60618	-9.97685	2.73115e-05	0.00032304
ENSMUSG00000036587	Fut7	0.719768	4.56131	5.04797	0.0016438	0.00712644
ENSMUSG00000011658	Fuz	-1.37543	4.44793	-9.28289	4.31811e-05	0.000444504
ENSMUSG00000009687	Fxyd5	2.56305	7.3567	27.3396	3.54402e-08	5.45441e-06
ENSMUSG00000049791	Fzd4	6.75458	-1.36453	5.22418	0.00135953	0.00616053
ENSMUSG00000041075	Fzd7	1.11865	4.66226	6.75913	0.000305954	0.00192757
ENSMUSG00000009633	G0s2	5.17887	-1.41712	3.3422	0.013028	0.0347959
ENSMUSG00000089992	G6pd2	1.46177	1.39322	3.07984	0.0186067	0.0460555
ENSMUSG00000031400	G6pdx	1.81569	6.70213	16.5678	1.00142e-06	3.73093e-05
ENSMUSG00000031714	Gab1	4.81385	-0.0173522	4.39184	0.00346339	0.012457
ENSMUSG00000004508	Gab2	1.36356	6.10841	13.157	4.56469e-06	9.20628e-05
ENSMUSG00000030161	Gabarapl1	0.926841	4.96365	6.90643	0.000268818	0.00176053
ENSMUSG00000031950	Gabarapl2	-1.18196	4.10393	-6.76861	0.000303396	0.00191894
ENSMUSG00000024462	Gabbr1	-3.5181	5.0104	-19.9179	2.94727e-07	1.78753e-05
ENSMUSG00000027361	Gabpb1	-0.726153	5.01043	-6.0535	0.000586959	0.00320177
ENSMUSG00000090665	Gad1-ps	3.34086	2.40134	9.72168	3.22135e-05	0.000361561
ENSMUSG00000036390	Gadd45a	4.33913	-0.475648	3.55126	0.00987571	0.0280108
ENSMUSG00000015312	Gadd45b	-0.826922	6.34002	-6.78371	0.000299373	0.00190374
ENSMUSG00000021453	Gadd45g	-1.32432	4.53787	-6.91302	0.00026728	0.00175618
ENSMUSG00000021003	Galc	3.18612	4.07134	9.78459	3.0918e-05	0.000351856
ENSMUSG00000028671	Gale	-1.24931	3.82051	-5.61341	0.000906875	0.00446462
ENSMUSG00000020766	Galk1	1.2524	2.84762	4.38535	0.0034901	0.0125229
ENSMUSG00000035473	Galm	-1.1339	3.59432	-5.79257	0.000757541	0.00387861
ENSMUSG00000015027	Galns	0.77818	4.09574	4.29298	0.00389605	0.0136351
ENSMUSG00000020520	Galnt10	1.52006	6.44791	17.0479	8.28827e-07	3.36952e-05
ENSMUSG00000039774	Galnt12	-1.78217	4.88431	-12.9506	5.06152e-06	9.85472e-05
ENSMUSG00000031608	Galnt7	1.26756	5.11262	7.63602	0.000145991	0.00111869
ENSMUSG00000033316	Galnt9	8.37952	-0.00482463	9.95138	2.77606e-05	0.000326262
ENSMUSG00000020150	Gamt	4.74021	0.155636	3.86399	0.00660472	0.0204224
ENSMUSG00000062646	Ganc	-0.645282	5.59046	-4.41558	0.00336761	0.0122102
ENSMUSG00000061099	Gapdhs	-2.07697	0.803973	-3.57786	0.00953807	0.0272324
ENSMUSG00000029777	Gars	0.634877	6.29543	6.29079	0.000468623	0.00269021
ENSMUSG00000034201	Gas2l1	1.52356	3.59468	6.01796	0.000607431	0.00327749
ENSMUSG00000074802	Gas2l3	2.2501	3.5058	7.8391	0.000124218	0.000984604
ENSMUSG00000031451	Gas6	5.63905	1.26158	4.70843	0.00239878	0.00944896
ENSMUSG00000033066	Gas7	8.08332	1.76787	8.94988	5.43777e-05	0.000524993
ENSMUSG00000029536	Gatc	0.822931	4.79457	6.53234	0.000375025	0.0022624
ENSMUSG00000027199	Gatm	1.81494	4.71443	8.70345	6.48053e-05	0.000605349
ENSMUSG00000015944	Gatsl2	-0.853321	5.37069	-6.78082	0.00030014	0.00190768
ENSMUSG00000028467	Gba2	-1.00647	6.0693	-7.3632	0.000182385	0.00133515
ENSMUSG00000026829	Gbgt1	4.11123	1.39592	3.42927	0.0115994	0.0317167
ENSMUSG00000028270	Gbp2	1.33787	6.05879	13.1582	4.56203e-06	9.20628e-05
ENSMUSG00000028268	Gbp3	2.42089	5.34825	19.7908	3.07576e-07	1.82401e-05
ENSMUSG00000079363	Gbp4	-0.846113	6.27039	-4.53361	0.00293282	0.0109882
ENSMUSG00000040264	Gbp5	6.2286	0.0463376	5.42599	0.0010994	0.00520624
ENSMUSG00000040253	Gbp7	1.06648	5.19644	5.12114	0.0015184	0.00669961
ENSMUSG00000034438	Gbp8	-1.44607	6.90771	-8.99346	5.27395e-05	0.00051303
ENSMUSG00000028124	Gclm	1.14738	4.11571	4.88468	0.00196749	0.00815509
ENSMUSG00000021360	Gcnt2	-0.589216	5.09843	-3.74265	0.00770704	0.0230747
ENSMUSG00000034424	Gcsh	1.36189	3.29713	4.3141	0.00379886	0.0133746
ENSMUSG00000058624	Gda	4.84934	4.03905	14.1221	2.87076e-06	6.89835e-05
ENSMUSG00000027865	Gdap2	0.587497	4.83151	4.30325	0.00384846	0.0135198
ENSMUSG00000025352	Gdf11	-2.78421	-0.222721	-3.3048	0.0136992	0.036173
ENSMUSG00000038508	Gdf15	4.50607	-0.379363	3.51459	0.0103627	0.0290227
ENSMUSG00000030117	Gdf3	6.14267	0.663745	5.11513	0.00152828	0.00673404
ENSMUSG00000018238	Gdf9	3.91223	-0.233451	3.14181	0.01709	0.0430933
ENSMUSG00000015291	Gdi1	-0.658529	7.82711	-9.49879	3.73281e-05	0.000404169
ENSMUSG00000040621	Gemin8	-2.23201	1.60984	-3.48793	0.0107331	0.0298146
ENSMUSG00000051235	Gen1	-0.962644	3.13159	-3.83364	0.00686325	0.0210506
ENSMUSG00000029275	Gfi1	-2.00902	0.461594	-3.28769	0.0140185	0.0368656
ENSMUSG00000026815	Gfi1b	5.03187	-1.52108	3.18575	0.016095	0.0411174
ENSMUSG00000051335	Gfod1	-1.6621	3.46901	-6.82347	0.000289065	0.00185829
ENSMUSG00000029992	Gfpt1	-0.997379	7.97303	-12.4266	6.62591e-06	0.000117826
ENSMUSG00000020363	Gfpt2	-4.09901	-0.716081	-3.45335	0.0112349	0.0308834
ENSMUSG00000022103	Gfra2	-2.71272	3.6614	-6.89783	0.00027084	0.00177197
ENSMUSG00000002797	Ggct	-1.03569	4.48646	-6.54045	0.000372272	0.0022533
ENSMUSG00000073987	Ggh	0.645533	4.81905	3.3178	0.0134618	0.035648
ENSMUSG00000031493	Ggn	-2.00809	2.14737	-5.51545	0.00100232	0.00482968
ENSMUSG00000006344	Ggt5	-1.25383	5.89997	-11.2163	1.28775e-05	0.000184364
ENSMUSG00000017747	Ghdc	0.947191	3.3103	3.62085	0.00901857	0.0261359
ENSMUSG00000031669	Gins3	-1.46361	3.81955	-7.45647	0.000168896	0.00125632
ENSMUSG00000050953	Gja1	5.83987	-0.662993	4.30234	0.00385265	0.0135235
ENSMUSG00000031266	Gla	1.65856	3.41897	7.10843	0.00022589	0.00154469
ENSMUSG00000045594	Glb1	0.772594	5.08418	5.50039	0.00101796	0.00487527
ENSMUSG00000028480	Glipr2	2.46182	3.52048	6.56261	0.000364862	0.00222145
ENSMUSG00000014303	Glis2	-1.79656	2.74218	-4.76714	0.00224442	0.00898047
ENSMUSG00000001418	Glmp	0.825952	6.50858	8.11137	0.000100569	0.000838732
ENSMUSG00000082100	Glns-ps1	1.352	3.35561	6.11918	0.000551145	0.00304887
ENSMUSG00000049971	Glt1d1	-3.15986	0.787827	-5.18871	0.00141203	0.00633185
ENSMUSG00000021916	Glt8d1	0.856475	3.77129	4.46704	0.00316985	0.0116619
ENSMUSG00000026473	Glul	1.08469	7.33761	8.13828	9.85237e-05	0.000827087
ENSMUSG00000062382	Gm10116	1.83575	3.48603	8.39172	8.14099e-05	0.000716451
ENSMUSG00000092116	Gm10320	1.2773	2.67622	4.56176	0.00283858	0.0107302
ENSMUSG00000072612	Gm10382	0.600774	4.81367	3.10087	0.0180764	0.0450099
ENSMUSG00000072618	Gm10384	4.52112	-0.781161	3.90918	0.00623934	0.0195308
ENSMUSG00000072940	Gm10443	0.718885	5.0904	4.41906	0.0033538	0.012186
ENSMUSG00000073492	Gm10521	5.50819	-0.444354	4.81485	0.00212709	0.00863122
ENSMUSG00000073985	Gm10602	3.88265	-0.206103	3.0876	0.0184092	0.0456802
ENSMUSG00000079884	Gm10698	0.886875	5.01925	7.58443	0.00015219	0.00115464
ENSMUSG00000075014	Gm10800	-0.703685	5.98676	-3.2777	0.0142086	0.0372669
ENSMUSG00000079505	Gm11131	-1.06282	2.26714	-3.40178	0.0120312	0.0326833
ENSMUSG00000083677	Gm11699	3.95729	-1.21855	3.10103	0.0180725	0.0450089
ENSMUSG00000089753	Gm11709	7.04272	-1.51547	5.27	0.00129492	0.00593642
ENSMUSG00000069609	Gm11710	7.28436	-2.29682	4.6143	0.0026715	0.0102423
ENSMUSG00000089722	Gm11711	6.4371	-1.97777	4.36337	0.00358231	0.0127722
ENSMUSG00000085501	Gm11772	1.80723	2.03747	5.12827	0.00150677	0.00665739
ENSMUSG00000085167	Gm12063	-3.72209	-0.799013	-3.037	0.0197391	0.0482486
ENSMUSG00000084773	Gm12159	-5.51597	-0.0876315	-4.70453	0.00240945	0.00947653
ENSMUSG00000082454	Gm12183	-0.664866	7.95823	-8.83129	5.91371e-05	0.000562564
ENSMUSG00000048852	Gm12185	-0.985605	3.22259	-3.04625	0.0194886	0.0477628
ENSMUSG00000081485	Gm12338	0.780459	2.98489	3.01625	0.0203139	0.0494293
ENSMUSG00000081775	Gm12420	1.71703	0.695376	3.0602	0.0191171	0.0469968
ENSMUSG00000078238	Gm12854	-1.71081	5.26659	-10.1498	2.44714e-05	0.00029959
ENSMUSG00000082575	Gm13050	0.658531	6.1694	6.5206	0.000379053	0.00227714
ENSMUSG00000083811	Gm13071	-2.84045	-0.744413	-3.03527	0.0197864	0.0483461
ENSMUSG00000085213	Gm13091	5.48026	-1.23023	3.51151	0.0104047	0.0291279
ENSMUSG00000078502	Gm13212	1.83757	3.49533	7.90148	0.000118288	0.000951009
ENSMUSG00000070605	Gm13251	1.14303	2.79771	3.79228	0.00723357	0.0219314
ENSMUSG00000083281	Gm13332	-3.92582	-1.67837	-3.06017	0.0191179	0.0469968
ENSMUSG00000087196	Gm13373	6.01509	0.563213	4.98906	0.00175318	0.00746792
ENSMUSG00000084241	Gm13416	2.94439	0.883027	4.47764	0.00313071	0.0115541
ENSMUSG00000087518	Gm13561	-2.18531	2.93749	-5.2594	0.00130956	0.00598413
ENSMUSG00000084104	Gm13578	0.69303	3.37394	3.15349	0.0168192	0.0425657
ENSMUSG00000075312	Gm13597	1.23116	2.27452	3.46729	0.0110296	0.0304357
ENSMUSG00000081611	Gm13651	-0.66469	3.72725	-3.62739	0.00894229	0.0259555
ENSMUSG00000082908	Gm13736	1.28833	2.3972	4.15316	0.00461333	0.0155073
ENSMUSG00000081344	Gm14303	0.994547	7.97662	5.82655	0.00073245	0.00376663
ENSMUSG00000084797	Gm14321	5.08968	-0.784548	3.91154	0.00622084	0.0194871
ENSMUSG00000079339	Gm14446	-0.844656	5.42682	-3.26299	0.0144937	0.0377923
ENSMUSG00000074417	Gm14548	-1.53537	3.94101	-8.92529	5.5328e-05	0.000531358
ENSMUSG00000083798	Gm14584	-1.41303	2.5313	-3.65799	0.00859461	0.0251326
ENSMUSG00000083621	Gm14586	0.762639	6.84187	6.4811	0.000392971	0.00234549
ENSMUSG00000082192	Gm14719	-1.4757	3.91508	-8.24043	9.11768e-05	0.00077907
ENSMUSG00000071041	Gm15210	0.779892	5.47166	5.44281	0.00108038	0.00513875
ENSMUSG00000084806	Gm15232	-1.20012	3.12999	-4.50011	0.00304956	0.0113127
ENSMUSG00000083083	Gm15382	-4.3093	-1.35814	-3.26481	0.0144579	0.0377448
ENSMUSG00000074466	Gm15417	1.71519	0.822348	3.07145	0.018823	0.0464752
ENSMUSG00000040323	Gm15429	1.4316	4.17039	8.40785	8.04403e-05	0.000712386
ENSMUSG00000074419	Gm15448	-1.85598	4.39427	-9.09133	4.9261e-05	0.000486596
ENSMUSG00000080242	Gm15487	0.722054	4.81676	5.22332	0.00136078	0.00616402
ENSMUSG00000086291	Gm15513	-1.92857	3.50299	-9.32253	4.20324e-05	0.000437088
ENSMUSG00000087138	Gm15545	-1.36519	1.87341	-3.15824	0.0167105	0.0423511
ENSMUSG00000085913	Gm15601	-1.8033	3.41739	-8.17688	9.56713e-05	0.000807336
ENSMUSG00000086894	Gm15708	-2.82376	1.33897	-4.82119	0.00211203	0.00859436
ENSMUSG00000042744	Gm15800	-0.602425	6.80344	-7.5084	0.000161877	0.00121601
ENSMUSG00000080917	Gm15925	-4.24778	4.42813	-14.7242	2.18163e-06	5.76294e-05
ENSMUSG00000081723	Gm15931	4.01107	2.27965	9.31902	4.21327e-05	0.000437503
ENSMUSG00000085337	Gm15964	1.62608	2.48768	3.95771	0.00587146	0.0186101
ENSMUSG00000087502	Gm16091	-1.4406	2.64486	-5.20389	0.00138929	0.00626248
ENSMUSG00000087248	Gm16120	5.59833	-0.711154	4.97595	0.00177861	0.00755134
ENSMUSG00000086245	Gm16170	-2.36157	2.99786	-9.82325	3.01512e-05	0.000345869
ENSMUSG00000086742	Gm16201	-2.03945	1.66835	-4.37532	0.00353185	0.0126446
ENSMUSG00000090222	Gm16340	5.42859	-1.06499	4.05275	0.00521797	0.0170607
ENSMUSG00000084093	Gm16418	1.33396	1.56235	3.00771	0.0205555	0.0498431
ENSMUSG00000083218	Gm16425	1.19538	1.93519	3.16091	0.0166496	0.0422269
ENSMUSG00000089956	Gm16553	-2.15151	1.55588	-5.09	0.00157042	0.00687286
ENSMUSG00000091509	Gm17066	-0.844302	3.05312	-3.05888	0.019152	0.0470538
ENSMUSG00000092216	Gm19345	-3.97396	1.63676	-9.28421	4.31422e-05	0.000444504
ENSMUSG00000073902	Gm1966	-0.78582	9.00566	-12.3221	7.00032e-06	0.000122629
ENSMUSG00000078193	Gm2000	1.18124	4.48514	7.3661	0.000181946	0.00133345
ENSMUSG00000092509	Gm20394	-4.9645	-0.290768	-4.10494	0.00489347	0.0161922
ENSMUSG00000092550	Gm20496	-1.61731	1.04259	-3.12553	0.0174751	0.0438931
ENSMUSG00000092222	Gm20506	-2.87558	1.68276	-7.35781	0.0001832	0.0013396
ENSMUSG00000059511	Gm20563	1.00799	2.22194	3.10716	0.0179211	0.0447341
ENSMUSG00000093726	Gm20667	-3.9089	-0.790132	-3.40527	0.0119754	0.032559
ENSMUSG00000094530	Gm21399	1.40856	4.0754	7.1208	0.000223525	0.00153464
ENSMUSG00000096401	Gm21811	-1.3773	1.432	-3.14496	0.0170166	0.0429965
ENSMUSG00000087823	Gm22281	-7.47164	-2.20318	-4.88861	0.00195892	0.00812998
ENSMUSG00000097423	Gm26522	2.15849	2.14486	5.43732	0.00108654	0.00515669
ENSMUSG00000097742	Gm26535	-4.31031	-0.903637	-3.84322	0.00678046	0.0208528
ENSMUSG00000097889	Gm26541	-1.45906	2.86826	-4.50886	0.00301859	0.01123
ENSMUSG00000097219	Gm26551	-5.49554	-1.73459	-3.45561	0.0112013	0.0308238
ENSMUSG00000097275	Gm26648	-1.70225	1.39363	-3.18621	0.016085	0.0411126
ENSMUSG00000097433	Gm26781	-7.01014	-1.39871	-5.6657	0.000860129	0.00427847
ENSMUSG00000097380	Gm26816	-2.0756	0.815765	-3.69873	0.00815428	0.0241453
ENSMUSG00000097033	Gm26819	-0.913356	3.18128	-3.84515	0.00676391	0.020815
ENSMUSG00000097718	Gm26896	-4.83082	-1.46329	-3.34062	0.0130556	0.0348437
ENSMUSG00000098146	Gm26935	-3.3016	-0.112813	-3.48313	0.0108012	0.0299588
ENSMUSG00000100280	Gm28417	-1.88934	2.34256	-5.63168	0.000890219	0.00440611
ENSMUSG00000101210	Gm28720	-2.33832	1.63072	-5.75166	0.000789036	0.00400183
ENSMUSG00000100975	Gm28875	2.58848	1.01112	3.27551	0.0142506	0.0373544
ENSMUSG00000101722	Gm29125	-4.64558	-0.531097	-4.05215	0.00522185	0.0170647
ENSMUSG00000100029	Gm29440	-3.8248	1.28781	-6.85147	0.000282044	0.00182649
ENSMUSG00000100548	Gm29585	3.63406	-0.894732	3.08408	0.0184987	0.0458495
ENSMUSG00000101439	Gm336	-6.13117	-0.503221	-5.51975	0.000997895	0.00481552
ENSMUSG00000090673	Gm340	-1.16062	3.78644	-5.86981	0.000701846	0.00364982
ENSMUSG00000078606	Gm4070	1.34684	2.81984	4.79847	0.00216659	0.00873322
ENSMUSG00000079139	Gm4204	-0.710722	7.87451	-10.4508	2.02951e-05	0.00026107
ENSMUSG00000097011	Gm4651	-7.58846	-1.39003	-6.32449	0.000454105	0.00262523
ENSMUSG00000073427	Gm4924	-2.47611	-0.00392919	-3.50733	0.0104621	0.0292505
ENSMUSG00000073555	Gm4951	2.04616	1.94732	3.76819	0.00745924	0.0225048
ENSMUSG00000025936	Gm4956	-4.37139	2.63149	-10.1662	2.4221e-05	0.000297087
ENSMUSG00000091183	Gm5141	-1.36348	2.47499	-3.19237	0.0159506	0.040833
ENSMUSG00000078780	Gm5150	1.21954	4.75626	9.65262	3.37077e-05	0.00037502
ENSMUSG00000058163	Gm5431	1.45088	5.37808	12.9882	4.96648e-06	9.75785e-05
ENSMUSG00000042962	Gm5436	0.78353	3.50472	3.75594	0.00757702	0.0227963
ENSMUSG00000067161	Gm5560	0.66806	4.3456	4.53567	0.00292582	0.0109682
ENSMUSG00000048600	Gm5763	-2.08424	3.85558	-7.22536	0.000204611	0.00145501
ENSMUSG00000043484	Gm5867	1.49954	2.30253	4.17945	0.00446806	0.0151385
ENSMUSG00000037827	Gm5884	1.54905	2.77452	5.71385	0.00081946	0.00411257
ENSMUSG00000094685	Gm5900	1.73002	2.26754	4.94388	0.00184257	0.00774909
ENSMUSG00000086926	Gm6226	-4.18658	-0.967757	-3.20381	0.0157042	0.0403292
ENSMUSG00000066491	Gm6265	1.26834	2.56095	4.29364	0.00389297	0.0136283
ENSMUSG00000048621	Gm6377	-1.55472	6.54419	-6.29105	0.000468506	0.00269021
ENSMUSG00000085172	Gm6542	0.685885	3.32586	3.06476	0.0189972	0.0467801
ENSMUSG00000090881	Gm6904	-1.73406	2.13154	-5.0058	0.0017213	0.00736123
ENSMUSG00000084289	Gm6977	1.82696	4.76465	10.0265	2.64593e-05	0.000316727
ENSMUSG00000048164	Gm7204	1.16099	2.09944	3.44346	0.011383	0.0312308
ENSMUSG00000080875	Gm7332	1.30127	2.25953	3.60586	0.00919616	0.0265138
ENSMUSG00000047370	Gm7367	1.33375	2.19662	3.88922	0.00639793	0.0198839
ENSMUSG00000068631	Gm7676	0.920508	4.06921	3.20123	0.0157595	0.0404484
ENSMUSG00000102752	Gm7694	1.61806	2.3718	4.44256	0.00326227	0.0119282
ENSMUSG00000082905	Gm7823	-0.795241	3.77782	-3.94545	0.00596211	0.0188271
ENSMUSG00000046580	Gm7862	-1.60886	1.72796	-3.62469	0.00897368	0.0260233
ENSMUSG00000059159	Gm8129	0.677949	4.58393	3.66973	0.00846513	0.0248608
ENSMUSG00000048188	Gm8181	1.26966	2.09136	3.52634	0.0102038	0.0286898
ENSMUSG00000049124	Gm8186	0.93208	3.2375	4.16539	0.00454512	0.0153459
ENSMUSG00000095704	Gm8221	-3.6988	3.19923	-11.7413	9.57853e-06	0.000149194
ENSMUSG00000058470	Gm8369	1.09775	2.80039	4.2909	0.00390578	0.0136618
ENSMUSG00000095841	Gm8532	-1.62637	0.864736	-3.00501	0.0206326	0.0499884
ENSMUSG00000047905	Gm8566	1.00753	4.18659	4.44281	0.0032613	0.0119282
ENSMUSG00000086008	Gm8817	-2.80764	0.753167	-3.84315	0.00678104	0.0208528
ENSMUSG00000063286	Gm8995	1.36797	8.49149	17.8015	6.22107e-07	2.91399e-05
ENSMUSG00000082433	Gm9025	1.18394	6.28807	13.9088	3.17223e-06	7.33634e-05
ENSMUSG00000096950	Gm9530	-1.39017	3.34712	-5.93846	0.000656183	0.00346675
ENSMUSG00000040540	Gm9770	1.74712	3.41905	6.28781	0.000469931	0.00269533
ENSMUSG00000001157	Gmcl1	-0.669002	5.21013	-5.28669	0.00127225	0.0058512
ENSMUSG00000070284	Gmppb	-0.599462	4.44884	-3.26063	0.01454	0.0378597
ENSMUSG00000000253	Gmpr	6.63321	-2.12001	4.47282	0.00314843	0.0115968
ENSMUSG00000000149	Gna12	1.28614	6.27904	12.0237	8.20966e-06	0.000135955
ENSMUSG00000034792	Gna15	1.70387	4.10488	10.5302	1.93334e-05	0.000252212
ENSMUSG00000036402	Gng12	4.00567	3.29905	14.0927	2.91033e-06	6.92905e-05
ENSMUSG00000068523	Gng5	1.22103	3.44839	4.1862	0.00443153	0.0150528
ENSMUSG00000038811	Gngt2	0.774213	7.46688	5.0445	0.00165003	0.00714386
ENSMUSG00000042354	Gnl3	0.780497	4.9808	5.44739	0.00107526	0.00511816
ENSMUSG00000025266	Gnl3l	-0.735591	5.55376	-7.4877	0.000164634	0.00123242
ENSMUSG00000029209	Gnpda2	-0.845525	3.57766	-3.9381	0.00601712	0.0189684
ENSMUSG00000034707	Gns	0.639002	8.9195	7.3131	0.000190131	0.001378
ENSMUSG00000021556	Golm1	1.28711	4.58788	8.18002	9.5443e-05	0.000806989
ENSMUSG00000032513	Gorasp1	1.38538	3.29807	5.04295	0.00165283	0.00714799
ENSMUSG00000025190	Got1	1.04761	4.71209	5.11596	0.00152691	0.00673258
ENSMUSG00000031672	Got2	-0.913551	5.96713	-8.07866	0.000103121	0.000852398
ENSMUSG00000089672	Gp49a	4.45511	4.4948	20.6942	2.28421e-07	1.54926e-05
ENSMUSG00000063808	Gpatch1	0.73512	3.86815	3.17797	0.0162667	0.0414457
ENSMUSG00000034220	Gpc1	-1.54597	4.15782	-8.27273	8.89846e-05	0.000764381
ENSMUSG00000023019	Gpd1	2.32079	1.23563	4.51392	0.00300082	0.0111723
ENSMUSG00000050627	Gpd1l	-0.861709	6.62422	-10.6536	1.79399e-05	0.000237874
ENSMUSG00000026827	Gpd2	-1.20103	6.04001	-11.6522	1.00634e-05	0.000154881
ENSMUSG00000031342	Gpm6b	-6.30105	3.50971	-26.1945	4.72202e-08	6.56411e-06
ENSMUSG00000064037	Gpn1	-0.678246	5.4668	-5.23043	0.00135052	0.00613474
ENSMUSG00000029816	Gpnmb	6.95986	0.198506	7.35535	0.000183573	0.00134027
ENSMUSG00000061577	Gpr114	-4.3671	6.62777	-22.5675	1.28069e-07	1.15161e-05
ENSMUSG00000031486	Gpr124	-2.73969	6.36911	-13.7011	3.50122e-06	7.8583e-05
ENSMUSG00000039116	Gpr126	-1.15618	4.52239	-6.88195	0.000274621	0.00179127
ENSMUSG00000021298	Gpr132	-0.841169	7.59959	-11.8562	8.99272e-06	0.000143791
ENSMUSG00000097715	Gpr137b-ps	0.767791	4.28188	4.32412	0.00375367	0.0132408
ENSMUSG00000044197	Gpr146	0.662349	5.24721	5.18002	0.00142523	0.00637537
ENSMUSG00000047875	Gpr157	-2.52279	4.46661	-14.0985	2.90238e-06	6.92905e-05
ENSMUSG00000037661	Gpr160	4.01306	3.0857	14.4708	2.44563e-06	6.23611e-05
ENSMUSG00000040836	Gpr161	-8.95587	-0.329841	-9.0416	5.09948e-05	0.000499062
ENSMUSG00000040229	Gpr34	-1.48287	6.20554	-16.1559	1.18289e-06	4.08472e-05
ENSMUSG00000044317	Gpr4	-7.16144	2.02948	-12.5849	6.10148e-06	0.000111653
ENSMUSG00000049608	Gpr55	-3.34464	1.70648	-8.3606	8.33179e-05	0.000726216
ENSMUSG00000047678	Gpr82	-4.07659	3.26769	-14.2215	2.74143e-06	6.69861e-05
ENSMUSG00000063234	Gpr84	6.95912	-1.13399	5.25347	0.00131783	0.00601371
ENSMUSG00000048216	Gpr85	4.70016	-1.21178	3.7584	0.00755318	0.0227351
ENSMUSG00000060470	Gpr97	3.85888	-0.480298	3.14355	0.0170492	0.043032
ENSMUSG00000043384	Gprasp1	-0.831647	4.59306	-5.43797	0.00108581	0.00515511
ENSMUSG00000008734	Gprc5b	-3.06736	1.00568	-4.94175	0.00184692	0.00775981
ENSMUSG00000027883	Gpsm2	2.78428	1.60223	4.59839	0.00272092	0.0103764
ENSMUSG00000063856	Gpx1	0.684826	9.70049	8.65417	6.71537e-05	0.000622839
ENSMUSG00000018339	Gpx3	1.96395	0.491872	3.15172	0.0168599	0.0426296
ENSMUSG00000001700	Gramd3	-0.747963	5.31731	-7.12408	0.000222902	0.00153208
ENSMUSG00000035900	Gramd4	0.628545	6.28122	6.18155	0.000519394	0.00290555
ENSMUSG00000004837	Grap	-3.27931	4.93465	-25.5148	5.63182e-08	7.06875e-06
ENSMUSG00000042351	Grap2	1.13319	5.82445	9.042	5.09806e-05	0.000499062
ENSMUSG00000000531	Grasp	-2.40491	1.66751	-4.47484	0.00314101	0.0115833
ENSMUSG00000003378	Grik5	-1.63967	2.89075	-4.95444	0.00182123	0.00767432
ENSMUSG00000020734	Grin2c	-4.43912	0.151425	-3.30733	0.0136525	0.0360643
ENSMUSG00000022564	Grina	1.42943	6.26185	12.4332	6.60319e-06	0.000117584
ENSMUSG00000003228	Grk5	0.846976	4.72227	5.54052	0.000976857	0.00473521
ENSMUSG00000034708	Grn	1.71616	9.05399	22.8488	1.17892e-07	1.08865e-05
ENSMUSG00000031364	Grpr	-5.333	-1.08794	-3.66911	0.00847194	0.0248751
ENSMUSG00000031822	Gse1	-1.13355	5.86144	-9.46929	3.80719e-05	0.000410162
ENSMUSG00000026879	Gsn	-1.06373	9.31062	-15.0877	1.85795e-06	5.31408e-05
ENSMUSG00000031584	Gsr	1.00603	6.23118	8.62256	6.87105e-05	0.000634946
ENSMUSG00000027610	Gss	1.33033	3.63876	5.46169	0.00105945	0.00505036
ENSMUSG00000058135	Gstm1	4.48866	1.20387	8.11848	0.000100024	0.000835885
ENSMUSG00000060803	Gstp1	0.882083	3.65255	4.59775	0.00272291	0.010381
ENSMUSG00000020962	Gtf2a1	-1.29564	6.30007	-15.1126	1.83794e-06	5.30171e-05
ENSMUSG00000042535	Gtpbp1	-1.13172	7.28772	-13.7626	3.39994e-06	7.69779e-05
ENSMUSG00000023982	Guca1a	2.13067	2.47965	6.95074	0.000258664	0.00171905
ENSMUSG00000025534	Gusb	1.37355	7.43028	19.3918	3.52243e-07	1.98856e-05
ENSMUSG00000040434	Gyltl1b	-6.45355	-1.79708	-4.76318	0.00225449	0.0090068
ENSMUSG00000051839	Gypa	5.14278	-1.22939	4.33471	0.00370656	0.0131211
ENSMUSG00000090523	Gypc	-1.381	4.97527	-7.16894	0.000214582	0.00149707
ENSMUSG00000096210	H1f0	1.15144	6.45617	8.56294	7.17603e-05	0.000656094
ENSMUSG00000036594	H2-Aa	0.633174	13.0675	7.7018	0.000138496	0.00107214
ENSMUSG00000060032	H2afj	0.836844	4.58762	6.12851	0.000546256	0.0030322
ENSMUSG00000049932	H2afx	-0.622692	5.16397	-4.88416	0.00196863	0.00815624
ENSMUSG00000079547	H2-DMb1	1.36275	8.41503	18.0143	5.74933e-07	2.7631e-05
ENSMUSG00000037548	H2-DMb2	-2.94762	7.59622	-19.9038	2.96123e-07	1.78753e-05
ENSMUSG00000060586	H2-Eb1	0.6951	13.1869	8.11065	0.000100625	0.000838732
ENSMUSG00000067341	H2-Eb2	-2.72733	7.62275	-11.4894	1.1023e-05	0.00016532
ENSMUSG00000016283	H2-M2	-2.83822	5.28068	-23.2379	1.05302e-07	1.00803e-05
ENSMUSG00000024459	H2-M5	-8.81297	-1.53252	-7.30761	0.000191002	0.00138257
ENSMUSG00000024334	H2-Oa	-2.3775	7.05556	-29.9815	1.90787e-08	3.97361e-06
ENSMUSG00000041538	H2-Ob	-2.23683	8.15351	-29.7856	1.99374e-08	4.02736e-06
ENSMUSG00000073409	H2-Q6	-0.814757	7.97682	-3.95129	0.00591875	0.0187176
ENSMUSG00000056116	H2-T22	0.676189	6.57982	8.37282	8.25623e-05	0.000723101
ENSMUSG00000053835	H2-T24	0.946711	5.96233	8.38166	8.2021e-05	0.000720358
ENSMUSG00000016559	H3f3b	0.763991	8.91007	10.3676	2.13629e-05	0.000270234
ENSMUSG00000028980	H6pd	0.867288	5.42054	7.91711	0.000116853	0.000941814
ENSMUSG00000027984	Hadh	1.32052	3.76188	6.20623	0.000507405	0.00285946
ENSMUSG00000061046	Haghl	-0.688951	4.58661	-3.48674	0.0107498	0.0298356
ENSMUSG00000006930	Hap1	-3.1667	6.11838	-6.82485	0.000288713	0.00185696
ENSMUSG00000078762	Haus5	-1.1547	2.69172	-4.29896	0.00386826	0.0135672
ENSMUSG00000035439	Haus8	-1.96861	7.48349	-29.5489	2.10353e-08	4.12036e-06
ENSMUSG00000020399	Havcr2	-1.28186	7.57671	-7.98786	0.000110599	0.000902094
ENSMUSG00000028051	Hcn3	-2.1685	1.3959	-4.63955	0.00259513	0.0100268
ENSMUSG00000062906	Hdac10	-1.07008	5.58812	-7.77267	0.000130906	0.00102505
ENSMUSG00000026313	Hdac4	-0.593457	5.2182	-4.63383	0.00261221	0.0100688
ENSMUSG00000008855	Hdac5	0.774883	7.03478	10.4189	2.06968e-05	0.000265321
ENSMUSG00000004698	Hdac9	-0.708616	5.10998	-4.96882	0.00179261	0.00759831
ENSMUSG00000025104	Hdgfrp3	2.23472	1.95973	4.27605	0.00397596	0.013851
ENSMUSG00000035181	Heatr5a	0.601885	6.80759	7.61735	0.0001482	0.00113163
ENSMUSG00000018925	Heatr9	-2.05267	1.67878	-5.07204	0.00160133	0.00698682
ENSMUSG00000042770	Hebp1	0.956491	3.78184	5.00835	0.0017165	0.00734557
ENSMUSG00000075254	Heg1	2.18887	4.7071	13.4994	3.8585e-06	8.45468e-05
ENSMUSG00000035266	Helq	-1.05267	4.214	-4.39925	0.00343318	0.012377
ENSMUSG00000020721	Helz	-0.836037	6.3401	-10.3682	2.13547e-05	0.000270234
ENSMUSG00000027580	Helz2	-1.0546	8.22896	-5.1847	0.00141809	0.00635463
ENSMUSG00000028332	Hemgn	3.87776	-0.439977	3.163	0.0166021	0.0421342
ENSMUSG00000044156	Hepacam2	3.20797	2.06033	9.46189	3.82612e-05	0.000410831
ENSMUSG00000038664	Herc1	-0.61549	7.96891	-8.2702	8.91539e-05	0.000765327
ENSMUSG00000029804	Herc3	-1.97393	5.44762	-11.0689	1.40251e-05	0.000196655
ENSMUSG00000029798	Herc6	-0.624517	6.53612	-7.23582	0.000202822	0.00144765
ENSMUSG00000022528	Hes1	-1.79471	4.09597	-5.1345	0.00149668	0.00662188
ENSMUSG00000025232	Hexa	1.69701	8.6179	20.3317	2.56987e-07	1.65523e-05
ENSMUSG00000021665	Hexb	1.64419	7.42117	22.4409	1.32976e-07	1.15161e-05
ENSMUSG00000028864	Hgf	4.32095	0.672239	3.31854	0.0134483	0.0356372
ENSMUSG00000029102	Hgfac	-7.93237	-0.0744982	-8.92438	5.53634e-05	0.000531358
ENSMUSG00000037260	Hgsnat	1.26984	5.56589	11.9889	8.36605e-06	0.000137254
ENSMUSG00000043099	Hic1	-4.32139	3.82264	-10.7458	1.6973e-05	0.00022857
ENSMUSG00000039959	Hip1	2.65623	6.12518	10.8228	1.62111e-05	0.00022154
ENSMUSG00000000915	Hip1r	-1.97532	5.13037	-16.3509	1.09267e-06	3.93481e-05
ENSMUSG00000061436	Hipk2	0.773735	6.2211	8.61107	6.92867e-05	0.000638445
ENSMUSG00000018102	Hist1h2bc	-1.2189	3.04293	-4.83149	0.0020878	0.00851184
ENSMUSG00000025877	Hk3	3.62759	4.89966	21.6621	1.68364e-07	1.2956e-05
ENSMUSG00000039377	Hlx	-1.29659	5.75319	-8.15878	9.69971e-05	0.000816924
ENSMUSG00000055632	Hmcn2	-2.8648	0.278753	-3.98803	0.00565369	0.0180739
ENSMUSG00000046711	Hmga1	1.14771	3.86074	5.09843	0.00155614	0.00682219
ENSMUSG00000078249	Hmga1-rs1	1.01692	3.36004	4.22614	0.00422232	0.0144973
ENSMUSG00000021670	Hmgcr	-0.656832	6.82128	-7.86645	0.000121577	0.000971413
ENSMUSG00000040681	Hmgn1	-0.761359	5.62181	-5.52412	0.00099343	0.00479935
ENSMUSG00000066456	Hmgn3	-2.35687	3.41166	-9.93946	2.79737e-05	0.000327786
ENSMUSG00000005413	Hmox1	2.40543	7.11443	4.01389	0.00547499	0.0176554
ENSMUSG00000026986	Hnmt	6.77312	-1.22699	5.51429	0.00100351	0.00483359
ENSMUSG00000007850	Hnrnph1	-0.646364	9.09044	-9.72394	3.2166e-05	0.000361561
ENSMUSG00000020069	Hnrnph3	-0.790743	5.90743	-7.92477	0.000116156	0.000937958
ENSMUSG00000007617	Homer1	1.02099	4.35181	6.24818	0.000487731	0.00277648
ENSMUSG00000003573	Homer3	1.16509	2.65932	3.41373	0.0118414	0.0322692
ENSMUSG00000028572	Hook1	-3.93769	2.15854	-12.1355	7.73052e-06	0.000130641
ENSMUSG00000059325	Hopx	5.28631	-0.793981	4.12484	0.00477564	0.0158904
ENSMUSG00000038253	Hoxa5	-7.38612	-1.11471	-6.04968	0.000589125	0.00321088
ENSMUSG00000038236	Hoxa7	-3.8733	1.4505	-5.90288	0.000679422	0.00355958
ENSMUSG00000075394	Hoxc4	-7.98282	-0.816366	-7.20563	0.000208037	0.00146647
ENSMUSG00000031722	Hp	3.29375	3.61225	9.98383	2.71898e-05	0.00032219
ENSMUSG00000071379	Hpcal1	1.3588	6.28585	14.3996	2.52626e-06	6.35398e-05
ENSMUSG00000031613	Hpgd	2.54407	6.79898	22.0979	1.47391e-07	1.21493e-05
ENSMUSG00000029919	Hpgds	0.653352	5.5418	5.22942	0.00135197	0.00613917
ENSMUSG00000025630	Hprt	0.664998	6.60099	6.91522	0.000266768	0.00175421
ENSMUSG00000035273	Hpse	2.32835	5.99869	22.1894	1.4338e-07	1.21151e-05
ENSMUSG00000022096	Hr	2.08581	3.31905	9.06727	5.00914e-05	0.000492832
ENSMUSG00000025499	Hras	0.614	4.04049	3.7152	0.00798334	0.0237452
ENSMUSG00000053004	Hrh1	-1.01228	4.30999	-6.73778	0.000311805	0.0019568
ENSMUSG00000020605	Hs1bp3	1.08477	4.0709	5.92737	0.000663328	0.00349593
ENSMUSG00000070407	Hs3st3b1	-3.66856	2.13902	-10.7213	1.72246e-05	0.000230996
ENSMUSG00000029311	Hsd17b11	0.8257	7.09682	10.9112	1.53844e-05	0.000212944
ENSMUSG00000024507	Hsd17b4	-0.756207	7.64329	-10.8289	1.61523e-05	0.000221205
ENSMUSG00000042289	Hsd3b7	1.27734	5.03571	8.6361	6.80389e-05	0.00062964
ENSMUSG00000062007	Hsh2d	-2.62996	4.33364	-8.54994	7.24453e-05	0.000660489
ENSMUSG00000020048	Hsp90b1	1.03813	9.36147	13.1091	4.67478e-06	9.36516e-05
ENSMUSG00000025757	Hspa4l	0.810872	4.25578	3.41046	0.011893	0.0323827
ENSMUSG00000026864	Hspa5	0.672826	10.0385	11.0435	1.42346e-05	0.000198517
ENSMUSG00000039745	Htatip2	0.643406	4.38634	4.08382	0.00502207	0.0165795
ENSMUSG00000006205	Htra1	4.15223	1.14575	6.36237	0.000438391	0.00254605
ENSMUSG00000029096	Htra3	5.5332	-2.15066	3.59082	0.00937809	0.0269123
ENSMUSG00000020413	Hus1	-0.685941	4.35652	-4.43297	0.00329929	0.0120319
ENSMUSG00000025261	Huwe1	-0.611905	9.11164	-10.0154	2.66482e-05	0.000317518
ENSMUSG00000064267	Hvcn1	-0.990143	5.32169	-8.53321	7.33385e-05	0.000665815
ENSMUSG00000074342	I830077J02Rik	-2.0008	7.9978	-21.14	1.98145e-07	1.40748e-05
ENSMUSG00000102051	I830127L07Rik	9.08168	-1.39816	7.79674	0.000128437	0.00101061
ENSMUSG00000062054	Iah1	0.640095	4.76284	4.56838	0.00281692	0.0106639
ENSMUSG00000037405	Icam1	-0.767942	8.05036	-11.8211	9.16737e-06	0.000145597
ENSMUSG00000001029	Icam2	1.00923	3.86629	5.04648	0.00164647	0.00713561
ENSMUSG00000026009	Icos	-4.88837	2.84979	-11.9495	8.54638e-06	0.000138456
ENSMUSG00000000732	Icosl	-1.9048	8.33532	-29.9153	1.9364e-08	3.97361e-06
ENSMUSG00000020644	Id2	-2.5984	6.60896	-15.4152	1.61267e-06	4.94043e-05
ENSMUSG00000007872	Id3	2.17685	0.672848	3.08411	0.0184977	0.0458495
ENSMUSG00000025950	Idh1	2.46669	5.50419	14.7789	2.12912e-06	5.70794e-05
ENSMUSG00000053560	Ier2	0.637111	6.7097	4.24285	0.004138	0.0142806
ENSMUSG00000073489	Ifi204	4.26886	5.53328	14.7706	2.13695e-06	5.70794e-05
ENSMUSG00000054203	Ifi205	3.70033	1.48138	8.13578	9.87112e-05	0.000828124
ENSMUSG00000064215	Ifi27	-1.18881	6.24379	-13.3872	4.07514e-06	8.67932e-05
ENSMUSG00000079017	Ifi27l2a	1.83206	7.00291	7.16111	0.000216009	0.0015038
ENSMUSG00000028037	Ifi44	1.75658	3.57585	5.03603	0.00166535	0.00718852
ENSMUSG00000078920	Ifi47	0.982644	6.45016	7.16755	0.000214834	0.00149723
ENSMUSG00000045932	Ifit2	0.662879	7.10978	3.85118	0.00671249	0.0207041
ENSMUSG00000025491	Ifitm1	-2.54304	4.42785	-10.9015	1.54725e-05	0.000213478
ENSMUSG00000060591	Ifitm2	1.83626	6.25157	17.2521	7.65914e-07	3.25159e-05
ENSMUSG00000025492	Ifitm3	1.18539	8.56965	13.839	3.27864e-06	7.46238e-05
ENSMUSG00000059108	Ifitm6	-0.641029	6.2257	-7.51806	0.000160608	0.00120929
ENSMUSG00000022967	Ifnar1	1.15871	8.1508	14.4803	2.43507e-06	6.23378e-05
ENSMUSG00000010048	Ifrd2	0.917169	3.78343	4.12761	0.00475951	0.0158754
ENSMUSG00000030323	Ift122	-1.54562	3.60276	-7.11025	0.00022554	0.00154469
ENSMUSG00000024169	Ift140	-2.0204	6.39997	-20.2022	2.68172e-07	1.67484e-05
ENSMUSG00000007987	Ift22	0.705123	3.75782	3.49316	0.0106593	0.0296606
ENSMUSG00000032965	Ift57	-0.886212	3.65619	-3.88758	0.00641117	0.0199096
ENSMUSG00000027778	Ift80	-1.64155	3.77024	-8.79374	6.07414e-05	0.000573186
ENSMUSG00000029469	Ift81	3.85601	-0.523359	3.00813	0.0205437	0.0498383
ENSMUSG00000020053	Igf1	1.86437	4.02551	3.71811	0.00795354	0.0236866
ENSMUSG00000005533	Igf1r	2.11715	3.12429	4.94885	0.00183249	0.00771425
ENSMUSG00000023830	Igf2r	5.82318	1.91604	8.47913	7.63109e-05	0.000682732
ENSMUSG00000017493	Igfbp4	3.47007	2.83442	4.89355	0.00194817	0.00809839
ENSMUSG00000026185	Igfbp5	7.49266	-2.19267	4.89243	0.00195061	0.00810329
ENSMUSG00000095079	Igha	5.21934	-0.849162	3.49988	0.0105652	0.0294649
ENSMUSG00000104213	Ighd	1.68149	1.92741	3.12362	0.0175209	0.0439826
ENSMUSG00000076621	Ighj1	1.91768	0.903729	3.35172	0.012863	0.0344436
ENSMUSG00000076620	Ighj2	3.7836	-0.359431	3.21071	0.0155576	0.0400415
ENSMUSG00000076619	Ighj3	5.51544	-1.8026	3.56227	0.0097344	0.0276585
ENSMUSG00000076609	Igkc	2.01875	2.44904	4.7347	0.0023283	0.00923323
ENSMUSG00000042035	Igsf3	-4.8259	2.2161	-12.5109	6.34061e-06	0.000115025
ENSMUSG00000035004	Igsf6	0.65462	8.0777	9.19097	4.59851e-05	0.000463611
ENSMUSG00000038034	Igsf8	2.0416	5.57651	17.2203	7.75344e-07	3.25159e-05
ENSMUSG00000037995	Igsf9	3.06978	3.87071	13.0807	4.74158e-06	9.41639e-05
ENSMUSG00000054072	Iigp1	1.87636	3.06977	6.79103	0.000297445	0.0018952
ENSMUSG00000042349	Ikbke	8.12075	1.06016	8.59165	7.02731e-05	0.000644777
ENSMUSG00000018654	Ikzf1	-0.759043	8.70042	-10.0763	2.56359e-05	0.000308874
ENSMUSG00000002578	Ikzf4	-5.2134	-0.826271	-4.63077	0.00262139	0.0100981
ENSMUSG00000073889	Il11ra1	0.929182	3.37791	3.69495	0.00819413	0.02423
ENSMUSG00000000791	Il12rb1	5.39055	-1.86504	3.56924	0.00964612	0.0274923
ENSMUSG00000018341	Il12rb2	-1.60963	5.61438	-13.4146	4.02087e-06	8.60627e-05
ENSMUSG00000017057	Il13ra1	1.71925	6.83873	17.9455	5.89709e-07	2.81016e-05
ENSMUSG00000031712	Il15	2.04486	3.51864	9.98438	2.71803e-05	0.00032219
ENSMUSG00000039217	Il18	0.73543	4.16284	4.59403	0.00273464	0.0104164
ENSMUSG00000026068	Il18rap	1.14269	2.68351	3.97027	0.00578013	0.0184189
ENSMUSG00000044103	Il1f9	6.82696	-1.62335	4.83293	0.00208444	0.00850353
ENSMUSG00000026073	Il1r2	-1.3249	3.10491	-4.49157	0.00308013	0.0114041
ENSMUSG00000022514	Il1rap	3.0173	2.89147	10.0983	2.52813e-05	0.000306027
ENSMUSG00000026069	Il1rl1	8.19077	-0.0306625	7.32979	0.000187509	0.0013634
ENSMUSG00000070942	Il1rl2	3.52413	0.167974	5.16373	0.00145034	0.00646553
ENSMUSG00000026981	Il1rn	2.30282	4.30134	13.8442	3.27065e-06	7.45732e-05
ENSMUSG00000030745	Il21r	-1.33317	7.07747	-5.35151	0.0011883	0.005554
ENSMUSG00000044701	Il27	3.91929	1.04206	3.89367	0.00636221	0.0198089
ENSMUSG00000050377	Il31ra	-1.43556	4.43651	-4.38836	0.00347771	0.0124888
ENSMUSG00000068758	Il3ra	1.21235	4.70727	7.38748	0.000178758	0.00131456
ENSMUSG00000074141	Il4i1	-1.71319	7.72576	-15.8717	1.33011e-06	4.40914e-05
ENSMUSG00000027947	Il6ra	0.618124	8.90661	10.385	2.1134e-05	0.000268917
ENSMUSG00000021756	Il6st	-0.901714	8.62489	-12.7132	5.71112e-06	0.000106771
ENSMUSG00000020279	Il9r	-4.10514	0.691232	-6.76466	0.00030446	0.00192141
ENSMUSG00000001016	Ilf2	-0.642902	5.87438	-6.55863	0.000366179	0.0022267
ENSMUSG00000056899	Immp2l	-2.79845	1.75879	-6.508	0.000383433	0.00230024
ENSMUSG00000061859	Inadl	-1.82593	3.66231	-8.08746	0.000102427	0.000849376
ENSMUSG00000074918	Inafm2	-0.792396	5.22942	-5.19796	0.00139812	0.00628909
ENSMUSG00000026102	Inpp1	-1.44173	3.79109	-7.73422	0.000134964	0.0010511
ENSMUSG00000028894	Inpp5b	-1.18753	6.27351	-13.9211	3.154e-06	7.33361e-05
ENSMUSG00000032737	Inppl1	1.30121	6.28473	10.697	1.7477e-05	0.000233653
ENSMUSG00000045294	Insig1	0.804303	5.23695	7.4721	0.000166748	0.00124608
ENSMUSG00000068154	Insm1	-1.93475	2.23492	-4.5611	0.00284076	0.0107321
ENSMUSG00000005534	Insr	0.716833	5.69131	6.0998	0.000561451	0.00309133
ENSMUSG00000035161	Ints6	-0.721828	5.39587	-6.69897	0.000322762	0.00201286
ENSMUSG00000032599	Ip6k2	-0.78801	5.02	-5.64078	0.000882055	0.00436737
ENSMUSG00000064065	Ipcef1	1.81318	4.14876	10.6869	1.75841e-05	0.0002346
ENSMUSG00000002319	Ipo4	0.617185	5.2042	5.03031	0.00167577	0.00722629
ENSMUSG00000028696	Ipp	-0.607504	3.96177	-3.25932	0.0145658	0.0379115
ENSMUSG00000021676	Iqgap2	1.50632	6.46581	10.3733	2.12872e-05	0.000270234
ENSMUSG00000028068	Iqgap3	-0.885497	4.26055	-5.10224	0.00154974	0.00680074
ENSMUSG00000034312	Iqsec1	-1.18128	6.26297	-14.1749	2.8012e-06	6.78162e-05
ENSMUSG00000041115	Iqsec2	2.07343	4.02024	12.1128	7.82545e-06	0.000131386
ENSMUSG00000060477	Irak2	0.72688	6.54462	8.08297	0.000102781	0.000850671
ENSMUSG00000020227	Irak3	4.08554	3.49371	15.5104	1.54848e-06	4.84634e-05
ENSMUSG00000031627	Irf2	0.826813	7.16862	11.4147	1.14982e-05	0.000170079
ENSMUSG00000034168	Irf2bpl	0.637804	4.87685	3.46669	0.0110383	0.0304532
ENSMUSG00000025498	Irf7	0.824509	8.21695	8.06286	0.00010438	0.000861148
ENSMUSG00000041515	Irf8	3.31556	6.44787	30.2063	1.81445e-08	3.90954e-06
ENSMUSG00000038894	Irs2	-0.696591	4.71083	-4.90768	0.00191788	0.00799301
ENSMUSG00000039236	Isg20	-0.907104	4.96144	-6.43157	0.000411242	0.00241991
ENSMUSG00000086784	Isoc2a	0.81783	4.61555	5.19063	0.00140913	0.00632701
ENSMUSG00000027598	Itch	-0.628085	8.18583	-9.87706	2.91197e-05	0.000336726
ENSMUSG00000001518	Itfg2	-0.953514	3.93317	-5.32806	0.00121793	0.00566383
ENSMUSG00000024187	Itfg3	1.46026	6.50514	16.2456	1.14036e-06	4.02803e-05
ENSMUSG00000027009	Itga4	-1.02087	10.0564	-13.2918	4.27037e-06	8.88781e-05
ENSMUSG00000000555	Itga5	2.42001	4.95344	13.8601	3.24615e-06	7.42598e-05
ENSMUSG00000027111	Itga6	2.48123	2.63825	8.91538	5.5716e-05	0.000533949
ENSMUSG00000026768	Itga8	3.62695	2.55367	9.32537	4.19514e-05	0.000437025
ENSMUSG00000039115	Itga9	2.94222	5.81152	20.2397	2.64874e-07	1.67038e-05
ENSMUSG00000030786	Itgam	1.2067	8.70462	14.4121	2.51185e-06	6.33006e-05
ENSMUSG00000027087	Itgav	0.79897	7.30711	5.82884	0.000730794	0.00376103
ENSMUSG00000030789	Itgax	-1.08841	10.4982	-13.1608	4.5562e-06	9.20628e-05
ENSMUSG00000025809	Itgb1	0.900825	9.04034	11.9159	8.70406e-06	0.000140482
ENSMUSG00000000157	Itgb2l	7.75809	-0.482178	7.27145	0.000196855	0.00141151
ENSMUSG00000020689	Itgb3	-2.9325	4.39774	-11.743	9.56989e-06	0.000149194
ENSMUSG00000022817	Itgb5	4.25662	5.64224	10.4922	1.9788e-05	0.000255564
ENSMUSG00000022108	Itm2b	1.43056	10.3638	14.4161	2.50722e-06	6.33006e-05
ENSMUSG00000038855	Itpkb	0.832047	6.5222	8.89279	5.66122e-05	0.000539971
ENSMUSG00000003752	Itpkc	0.728126	3.93935	4.20593	0.00432677	0.014778
ENSMUSG00000030102	Itpr1	-0.625115	8.12329	-8.57845	7.09522e-05	0.000649624
ENSMUSG00000042644	Itpr3	-2.23209	6.84897	-19.8922	2.97277e-07	1.78753e-05
ENSMUSG00000095115	Itpripl2	0.905912	7.41531	13.4382	3.97487e-06	8.60449e-05
ENSMUSG00000022957	Itsn1	2.63297	4.70646	6.93265	0.000262755	0.00173511
ENSMUSG00000023150	Ivns1abp	-1.0649	8.94633	-15.3262	1.67549e-06	4.99313e-05
ENSMUSG00000055862	Izumo4	-1.54278	3.66221	-7.72983	0.000135437	0.00105407
ENSMUSG00000025764	Jade1	-0.595985	5.04859	-4.75748	0.00226904	0.00904537
ENSMUSG00000020387	Jade2	-1.04149	6.47822	-11.7659	9.44963e-06	0.000148258
ENSMUSG00000027276	Jag1	-3.6703	4.17601	-15.1058	1.84337e-06	5.30171e-05
ENSMUSG00000024789	Jak2	-2.52416	8.71731	-33.6205	8.83256e-09	3.04436e-06
ENSMUSG00000031805	Jak3	-0.601767	6.56467	-5.54817	0.000969236	0.00470356
ENSMUSG00000034271	Jdp2	2.48886	5.13355	18.2145	5.3424e-07	2.61616e-05
ENSMUSG00000037876	Jmjd1c	-1.05057	8.21446	-13.199	4.47048e-06	9.15918e-05
ENSMUSG00000022426	Josd1	-0.613896	5.26284	-5.41556	0.00111139	0.00524358
ENSMUSG00000079083	Jrkl	-0.775099	4.97901	-6.20734	0.00050687	0.00285775
ENSMUSG00000052684	Jun	0.918774	9.10344	5.15404	0.00146553	0.00651752
ENSMUSG00000071076	Jund	1.06954	6.44141	11.2764	1.24411e-05	0.000179908
ENSMUSG00000001552	Jup	0.910994	5.35119	3.68188	0.00833331	0.0245685
ENSMUSG00000032194	Kank2	4.18865	-0.217224	3.20472	0.0156847	0.0402966
ENSMUSG00000042099	Kank3	1.12494	3.2519	4.5873	0.00275594	0.0104839
ENSMUSG00000021767	Kat6b	-0.60422	5.05107	-4.45484	0.00321553	0.0118023
ENSMUSG00000055675	Kbtbd11	0.791868	7.27296	8.22526	9.22276e-05	0.000784936
ENSMUSG00000043881	Kbtbd7	-0.694587	5.29614	-6.14536	0.000537556	0.00299162
ENSMUSG00000030031	Kbtbd8	-0.987473	3.12111	-3.81486	0.00702876	0.0214473
ENSMUSG00000047959	Kcna3	1.46289	3.84344	8.39997	8.09123e-05	0.000714016
ENSMUSG00000028931	Kcnab2	0.882282	5.86679	6.89475	0.000271569	0.00177495
ENSMUSG00000062785	Kcnc3	-1.99291	1.91263	-5.56459	0.000953097	0.00463948
ENSMUSG00000035165	Kcne3	6.31741	0.918961	5.95708	0.000644381	0.00342701
ENSMUSG00000059852	Kcng2	2.83238	-0.742054	3.03184	0.0198805	0.0484975
ENSMUSG00000079056	Kcnip3	-3.00205	4.72725	-16.6921	9.53094e-07	3.64119e-05
ENSMUSG00000044708	Kcnj10	2.04649	4.39846	4.47831	0.00312827	0.0115503
ENSMUSG00000051497	Kcnj16	-5.54461	2.28549	-16.7593	9.28046e-07	3.60724e-05
ENSMUSG00000041695	Kcnj2	3.96802	3.24663	4.96188	0.00180637	0.00764161
ENSMUSG00000045404	Kcnk13	3.6803	1.52533	8.10721	0.00010089	0.000839859
ENSMUSG00000023243	Kcnk5	-8.80513	-1.53643	-7.27781	0.000195811	0.00140558
ENSMUSG00000046410	Kcnk6	-1.7927	6.73298	-18.4826	4.84812e-07	2.4483e-05
ENSMUSG00000054342	Kcnn4	3.4695	4.44041	17.5327	6.88219e-07	3.13285e-05
ENSMUSG00000056258	Kcnq3	6.22169	-1.28112	4.86589	0.00200907	0.0082758
ENSMUSG00000046731	Kctd11	1.0335	3.22257	4.06187	0.00515966	0.0168999
ENSMUSG00000098557	Kctd12	1.72994	7.87398	20.8872	2.14706e-07	1.48434e-05
ENSMUSG00000041633	Kctd12b	2.23005	3.99826	7.57986	0.000152753	0.00115824
ENSMUSG00000051727	Kctd14	2.71852	3.20378	10.2861	2.24707e-05	0.000280406
ENSMUSG00000033287	Kctd17	1.09065	3.57359	4.70856	0.00239844	0.00944896
ENSMUSG00000044952	Kctd21	1.30283	3.5771	4.41593	0.00336619	0.0122102
ENSMUSG00000021752	Kctd6	1.29487	2.85631	4.78687	0.00219506	0.00882807
ENSMUSG00000034487	Kdelc2	3.8931	2.14577	11.3293	1.20703e-05	0.000176322
ENSMUSG00000002778	Kdelr1	0.627498	6.32526	7.38009	0.000179853	0.00132035
ENSMUSG00000079111	Kdelr2	0.730123	5.37779	6.94754	0.000259384	0.00171905
ENSMUSG00000038080	Kdm1b	-0.725366	5.25228	-6.52737	0.000376728	0.00226738
ENSMUSG00000029475	Kdm2b	-0.761194	6.12125	-5.25646	0.00131365	0.00599678
ENSMUSG00000009905	Kdsr	0.897611	4.04307	5.36094	0.00117661	0.00550534
ENSMUSG00000047153	Khnyn	-0.760336	6.90525	-6.39057	0.000427092	0.00249275
ENSMUSG00000012443	Kif11	-1.11073	5.64851	-6.45258	0.000403377	0.00238448
ENSMUSG00000041498	Kif14	-0.92033	3.27117	-3.11599	0.0177052	0.0443418
ENSMUSG00000036768	Kif15	-1.05549	4.65629	-5.27725	0.00128501	0.00589938
ENSMUSG00000028758	Kif17	-3.51838	1.80893	-7.09499	0.000228493	0.00155799
ENSMUSG00000010021	Kif19a	4.46978	-0.313984	3.38896	0.0122386	0.033142
ENSMUSG00000003779	Kif20a	-0.750904	3.96226	-3.5766	0.00955376	0.0272651
ENSMUSG00000030677	Kif22	-0.958438	3.72253	-4.9033	0.0019272	0.00802669
ENSMUSG00000032254	Kif23	-0.8338	5.57021	-8.3611	8.32865e-05	0.000726216
ENSMUSG00000020668	Kif3c	0.710171	4.06883	3.80281	0.00713724	0.0217055
ENSMUSG00000034311	Kif4	-1.05746	3.76361	-5.73752	0.00080026	0.00404689
ENSMUSG00000032489	Kif9	-1.77397	4.73897	-9.25643	4.39678e-05	0.000450399
ENSMUSG00000004187	Kifc2	-1.33579	2.06226	-3.30097	0.0137699	0.0363301
ENSMUSG00000031788	Kifc3	2.38704	3.38155	10.8905	1.55734e-05	0.000214641
ENSMUSG00000005672	Kit	-4.98824	7.01271	-41.0135	2.31662e-09	1.87183e-06
ENSMUSG00000024862	Klc2	-1.65245	4.79589	-12.7291	5.66478e-06	0.000106641
ENSMUSG00000003546	Klc4	0.897312	4.40542	4.02516	0.00539909	0.0174673
ENSMUSG00000037465	Klf10	2.35642	5.20452	18.8614	4.23631e-07	2.25379e-05
ENSMUSG00000020653	Klf11	1.28437	3.15124	3.29383	0.0139029	0.0366285
ENSMUSG00000055148	Klf2	1.76515	6.10471	12.6487	5.90362e-06	0.000109501
ENSMUSG00000003032	Klf4	1.37115	6.92089	7.88981	0.000119372	0.000959134
ENSMUSG00000000078	Klf6	0.628105	7.93676	5.21882	0.00136732	0.00618933
ENSMUSG00000041649	Klf8	-0.894076	3.22986	-3.74178	0.00771561	0.023089
ENSMUSG00000051890	Klhdc1	-0.916564	3.28228	-4.07634	0.00506846	0.0166876
ENSMUSG00000032609	Klhdc8b	-1.35405	2.72239	-4.32832	0.00373491	0.0131998
ENSMUSG00000026455	Klhl12	2.43471	1.98017	5.66259	0.000862828	0.00428695
ENSMUSG00000054792	Klhl18	-1.22986	7.2795	-13.4202	4.00991e-06	8.60449e-05
ENSMUSG00000062901	Klhl24	0.735121	7.23941	9.86032	2.94362e-05	0.000339172
ENSMUSG00000043008	Klhl6	1.49772	5.68361	10.2507	2.29711e-05	0.000284727
ENSMUSG00000064023	Klk8	-2.60079	1.4951	-4.36619	0.00357031	0.0127435
ENSMUSG00000014543	Klra17	2.54065	4.02382	10.4865	1.98565e-05	0.000256193
ENSMUSG00000030187	Klra2	6.1944	4.64889	37.9831	3.88537e-09	2.14383e-06
ENSMUSG00000079298	Klrb1b	3.89657	3.04125	12.1896	7.51049e-06	0.000128433
ENSMUSG00000030154	Klrb1f	-3.23479	3.32844	-11.8147	9.1996e-06	0.000145751
ENSMUSG00000030165	Klrd1	-1.07611	6.82367	-8.59624	7.00384e-05	0.00064308
ENSMUSG00000067610	Klri1	-2.7867	6.16832	-27.2779	3.59814e-08	5.47256e-06
ENSMUSG00000043932	Klri2	-2.19578	4.97669	-18.1296	5.51071e-07	2.676e-05
ENSMUSG00000030149	Klrk1	2.09301	6.0267	14.36	2.57238e-06	6.42002e-05
ENSMUSG00000039783	Kmo	-1.1438	7.93675	-15.7098	1.4233e-06	4.62323e-05
ENSMUSG00000006307	Kmt2b	-1.00407	8.01081	-13.711	3.48469e-06	7.83479e-05
ENSMUSG00000038056	Kmt2c	-1.08963	8.22722	-14.9609	1.96423e-06	5.50836e-05
ENSMUSG00000048154	Kmt2d	-0.816439	8.80198	-12.7739	5.53646e-06	0.000104642
ENSMUSG00000066129	Kndc1	-5.96306	-0.791578	-5.48779	0.00103127	0.00493604
ENSMUSG00000030980	Knop1	-1.40384	6.65191	-13.2947	4.26437e-06	8.88781e-05
ENSMUSG00000029414	Kntc1	-0.976296	4.31222	-4.43773	0.00328086	0.0119749
ENSMUSG00000006021	Kptn	-1.34915	4.83278	-9.33411	4.17032e-05	0.000435492
ENSMUSG00000042810	Krba1	-1.3893	3.19718	-5.35177	0.00118798	0.005554
ENSMUSG00000037185	Krt80	0.747025	7.5099	8.0705	0.000103769	0.000856658
ENSMUSG00000042747	Krtcap2	0.826629	4.75634	6.48679	0.000390932	0.0023344
ENSMUSG00000029149	Krtcap3	-0.804332	3.03786	-3.15314	0.0168274	0.0425723
ENSMUSG00000018334	Ksr1	-0.650701	5.13288	-4.87797	0.00198223	0.00819717
ENSMUSG00000026866	Kynu	-2.57099	5.79472	-25.0551	6.36151e-08	7.61381e-06
ENSMUSG00000031391	L1cam	0.669938	5.70068	3.91961	0.0061582	0.0193142
ENSMUSG00000039089	L3mbtl3	-0.647129	4.95597	-4.95478	0.00182055	0.00767397
ENSMUSG00000044350	Lacc1	1.02863	6.39433	7.01739	0.000244196	0.00163573
ENSMUSG00000041782	Lad1	-2.95329	3.68369	-8.35991	8.33606e-05	0.000726216
ENSMUSG00000030124	Lag3	-1.67391	4.41231	-6.27486	0.000475668	0.00272044
ENSMUSG00000031447	Lamp1	2.00553	8.7772	21.4119	1.81942e-07	1.35819e-05
ENSMUSG00000016534	Lamp2	1.83927	7.91031	28.1305	2.92675e-08	4.93099e-06
ENSMUSG00000030842	Lamtor1	0.711603	5.97743	6.45918	0.00040094	0.00237659
ENSMUSG00000050552	Lamtor4	0.976409	5.13719	7.9086	0.000117632	0.000946912
ENSMUSG00000039682	Lap3	1.08238	4.98434	7.09196	0.000229084	0.0015612
ENSMUSG00000020585	Laptm4a	1.30549	7.7388	20.2248	2.66179e-07	1.67047e-05
ENSMUSG00000040751	Lat2	1.32509	5.72305	10.2898	2.24186e-05	0.000280406
ENSMUSG00000021959	Lats2	1.30408	5.94147	13.8878	3.20386e-06	7.37967e-05
ENSMUSG00000030763	Lcmt1	1.01303	3.68845	5.00957	0.0017142	0.007343
ENSMUSG00000026822	Lcn2	9.11029	1.73367	7.16832	0.000214694	0.00149707
ENSMUSG00000025019	Lcor	-0.86875	4.91561	-7.06776	0.000233868	0.00158048
ENSMUSG00000032193	Ldlr	0.996813	6.51985	12.0725	7.99679e-06	0.000133397
ENSMUSG00000048058	Ldlrad3	3.66578	2.7394	9.76504	3.13142e-05	0.000355738
ENSMUSG00000024544	Ldlrad4	1.11756	2.63566	3.92037	0.00615232	0.0193004
ENSMUSG00000037295	Ldlrap1	2.60039	4.78273	15.2054	1.7652e-06	5.16324e-05
ENSMUSG00000037363	Letm2	-0.974276	3.22754	-3.09355	0.0182592	0.0453953
ENSMUSG00000068220	Lgals1	3.02774	5.20428	12.6724	5.83202e-06	0.000108328
ENSMUSG00000050335	Lgals3	2.89859	7.41614	27.8505	3.13004e-08	5.04243e-06
ENSMUSG00000033880	Lgals3bp	2.18384	7.76951	26.4144	4.46453e-08	6.34258e-06
ENSMUSG00000057554	Lgals8	0.88453	6.02302	10.0948	2.53362e-05	0.000306404
ENSMUSG00000001123	Lgals9	1.52934	6.00628	10.7639	1.67902e-05	0.000226816
ENSMUSG00000042363	Lgalsl	4.17254	0.704084	3.20702	0.015636	0.0402112
ENSMUSG00000036560	Lgi4	7.01275	-2.43262	4.24649	0.00411988	0.0142411
ENSMUSG00000021190	Lgmn	2.89886	8.10391	43.4283	1.57539e-09	1.41317e-06
ENSMUSG00000045312	Lhfpl2	6.52127	-2.67837	3.62219	0.00900295	0.0260964
ENSMUSG00000054263	Lifr	2.0398	5.51319	20.4561	2.46748e-07	1.62296e-05
ENSMUSG00000070873	Lilra5	4.96737	2.03331	9.40956	3.96302e-05	0.000421332
ENSMUSG00000062593	Lilrb4	3.62666	6.14306	31.9406	1.24681e-08	3.35807e-06
ENSMUSG00000023022	Lima1	2.35388	4.51231	10.6598	1.78734e-05	0.000237479
ENSMUSG00000040699	Limd2	-1.44267	8.81371	-14.8511	2.06189e-06	5.61247e-05
ENSMUSG00000020451	Limk2	-0.658396	4.98926	-5.42353	0.00110221	0.00521313
ENSMUSG00000024781	Lipa	1.25086	8.51546	17.1462	7.97821e-07	3.29699e-05
ENSMUSG00000022500	Litaf	2.30349	6.05471	22.8999	1.16142e-07	1.0802e-05
ENSMUSG00000041891	Lman1	1.07397	5.98834	9.56338	3.57566e-05	0.000392412
ENSMUSG00000073725	Lmbrd1	0.662066	6.24157	6.41739	0.000416648	0.00244393
ENSMUSG00000002279	Lmf1	1.02201	4.32548	5.9769	0.00063208	0.00337806
ENSMUSG00000028063	Lmna	6.67728	2.77192	20.3123	2.5863e-07	1.65523e-05
ENSMUSG00000024590	Lmnb1	-0.961217	6.77539	-8.97979	5.32473e-05	0.000515923
ENSMUSG00000025500	Lmntd2	-4.75944	0.716952	-6.72123	0.000316424	0.00197907
ENSMUSG00000036111	Lmo1	7.85787	-0.812881	7.21828	0.000205833	0.00145889
ENSMUSG00000028266	Lmo4	0.951651	6.67063	12.2534	7.25978e-06	0.000125979
ENSMUSG00000038970	Lmtk2	-1.80659	7.28301	-16.6727	9.60454e-07	3.64128e-05
ENSMUSG00000016520	Lnx2	-0.778599	4.33018	-4.77295	0.00222975	0.0089356
ENSMUSG00000016239	Lonrf3	4.681	-1.62432	3.47432	0.0109276	0.030225
ENSMUSG00000024529	Lox	6.92088	-2.47856	4.04602	0.00526152	0.0171333
ENSMUSG00000000693	Loxl3	0.878399	4.80312	4.45014	0.00323332	0.0118448
ENSMUSG00000038668	Lpar1	-4.87164	-0.210769	-4.35148	0.00363325	0.0129175
ENSMUSG00000031861	Lpar2	-1.5682	1.53284	-3.11115	0.0178233	0.0445772
ENSMUSG00000036832	Lpar3	-3.26628	2.21591	-9.73635	3.19061e-05	0.000360198
ENSMUSG00000033446	Lpar6	2.05424	4.79797	16.0845	1.21804e-06	4.14391e-05
ENSMUSG00000004270	Lpcat3	0.960593	4.98205	7.29767	0.00019259	0.00139018
ENSMUSG00000013033	Lphn1	-2.37172	3.02083	-8.66375	6.66895e-05	0.00062026
ENSMUSG00000028184	Lphn2	2.40807	1.16584	4.06221	0.00515748	0.0168971
ENSMUSG00000037605	Lphn3	-2.74406	5.70067	-17.7558	6.32819e-07	2.94284e-05
ENSMUSG00000015568	Lpl	6.14125	6.43138	21.3071	1.88003e-07	1.37317e-05
ENSMUSG00000028080	Lrba	-2.46974	6.43514	-25.9711	5.00098e-08	6.73465e-06
ENSMUSG00000037095	Lrg1	6.92078	-0.816176	5.60308	0.000916443	0.00450486
ENSMUSG00000030029	Lrig1	-2.46308	0.451301	-4.03118	0.00535901	0.0173681
ENSMUSG00000040249	Lrp1	2.93862	9.053	32.9661	1.0081e-08	3.08357e-06
ENSMUSG00000022305	Lrp12	2.21093	2.40435	4.70894	0.00239741	0.00944896
ENSMUSG00000024913	Lrp5	0.668647	6.45785	5.50892	0.00100907	0.00485046
ENSMUSG00000028613	Lrp8	-2.84567	4.55366	-18.5849	4.67338e-07	2.39805e-05
ENSMUSG00000029103	Lrpap1	0.989253	5.68566	8.67355	6.62188e-05	0.00061766
ENSMUSG00000021338	Lrrc16a	-2.62516	5.6166	-22.061	1.49046e-07	1.21493e-05
ENSMUSG00000022211	Lrrc16b	-5.06839	2.60252	-14.8987	2.01883e-06	5.59606e-05
ENSMUSG00000041673	Lrrc18	-4.54442	-0.596964	-3.85933	0.0066437	0.0205281
ENSMUSG00000047766	Lrrc49	2.63998	1.29765	4.79207	0.00218225	0.00878337
ENSMUSG00000034158	Lrrc58	0.635975	5.73713	6.28205	0.000472472	0.0027063
ENSMUSG00000020869	Lrrc59	0.691761	6.65881	7.84997	0.00012316	0.000979825
ENSMUSG00000007476	Lrrc8a	0.983319	2.20555	3.04181	0.0196084	0.0480109
ENSMUSG00000070639	Lrrc8b	0.98856	3.19214	4.26782	0.00401546	0.0139698
ENSMUSG00000046079	Lrrc8d	0.813729	5.70169	6.93979	0.000261132	0.0017277
ENSMUSG00000027550	Lrrcc1	0.881798	4.30084	4.93327	0.00186429	0.00781358
ENSMUSG00000015133	Lrrk1	-1.0395	8.50284	-13.3561	4.13769e-06	8.71205e-05
ENSMUSG00000044847	Lsm11	0.864141	3.33688	3.34113	0.0130468	0.0348273
ENSMUSG00000018819	Lsp1	-0.65903	10.4417	-9.75882	3.14413e-05	0.000356243
ENSMUSG00000001247	Lsr	2.03163	3.1276	5.24496	0.0013298	0.00605978
ENSMUSG00000033105	Lss	-0.615664	4.01354	-3.74926	0.00764203	0.0229172
ENSMUSG00000073412	Lst1	1.21083	6.17294	12.5528	6.20376e-06	0.00011312
ENSMUSG00000024402	Lta	-5.08508	0.160412	-4.18777	0.00442311	0.015036
ENSMUSG00000015889	Lta4h	-1.29126	7.37326	-12.7075	5.72789e-06	0.000106854
ENSMUSG00000024399	Ltb	-3.86061	6.81328	-28.3413	2.78372e-08	4.93099e-06
ENSMUSG00000046908	Ltb4r1	3.97305	3.99728	14.2476	2.70863e-06	6.66994e-05
ENSMUSG00000002020	Ltbp2	-2.82813	1.99621	-8.2284	9.20088e-05	0.000783794
ENSMUSG00000024940	Ltbp3	3.24229	2.57498	10.7275	1.71602e-05	0.000230371
ENSMUSG00000032496	Ltf	9.36536	3.05923	6.5105	0.000382559	0.00229607
ENSMUSG00000001089	Luzp1	1.04684	4.9367	7.07787	0.000231856	0.00157346
ENSMUSG00000047557	Lxn	1.11054	2.67367	3.22039	0.0153546	0.0396295
ENSMUSG00000075602	Ly6a	3.56714	4.39167	11.519	1.08411e-05	0.000163922
ENSMUSG00000022584	Ly6c2	6.50272	2.17032	12.7271	5.67059e-06	0.000106641
ENSMUSG00000022587	Ly6e	1.14039	10.2676	16.4951	1.03099e-06	3.78448e-05
ENSMUSG00000022582	Ly6g	8.17633	-1.85084	5.89636	0.000683777	0.00356878
ENSMUSG00000022586	Ly6i	2.69618	2.81079	10.2286	2.32908e-05	0.000287862
ENSMUSG00000026980	Ly75	-2.17506	4.30656	-14.3216	2.61801e-06	6.48383e-05
ENSMUSG00000021423	Ly86	0.992974	8.36817	15.2656	1.71984e-06	5.07629e-05
ENSMUSG00000025779	Ly96	2.03998	2.3608	5.76361	0.000779687	0.00396539
ENSMUSG00000034041	Lyl1	2.51698	5.8918	27.501	3.40678e-08	5.30637e-06
ENSMUSG00000072640	Lyrm9	-1.00554	3.30926	-4.29012	0.00390944	0.0136678
ENSMUSG00000032184	Lysmd2	-5.67071	2.60662	-11.6952	9.82587e-06	0.00015213
ENSMUSG00000019726	Lyst	-3.04642	8.70862	-26.4614	4.41168e-08	6.33713e-06
ENSMUSG00000069515	Lyz1	3.52156	5.17084	16.5365	1.01405e-06	3.74562e-05
ENSMUSG00000069516	Lyz2	4.83388	10.4482	43.6829	1.51452e-09	1.41317e-06
ENSMUSG00000036306	Lzts1	-5.59719	0.521149	-8.13218	9.89831e-05	0.000829866
ENSMUSG00000080832	M6pr-ps	-0.63614	4.57021	-4.24691	0.00411779	0.0142377
ENSMUSG00000036278	Macrod1	1.5685	1.65968	3.69369	0.00820744	0.0242583
ENSMUSG00000029554	Mad1l1	0.775867	4.63052	5.09333	0.00156477	0.00685043
ENSMUSG00000029910	Mad2l1	-0.689581	4.24084	-4.14246	0.0046739	0.0156499
ENSMUSG00000055435	Maf	4.93761	5.62365	17.8522	6.10488e-07	2.86996e-05
ENSMUSG00000074622	Mafb	3.51273	5.84401	9.03989	5.10557e-05	0.000499083
ENSMUSG00000042622	Maff	-1.2927	3.14913	-5.42688	0.00109838	0.00520333
ENSMUSG00000036634	Mag	6.53517	-1.13636	4.72957	0.0023419	0.00927577
ENSMUSG00000031227	Magee1	-1.50647	3.27517	-5.81411	0.000741522	0.00380413
ENSMUSG00000052539	Magi3	-1.32813	2.70036	-4.15481	0.00460407	0.0154963
ENSMUSG00000032688	Malt1	-2.03614	8.10373	-20.3188	2.58077e-07	1.65523e-05
ENSMUSG00000031925	Maml2	1.6654	3.00993	6.53891	0.000372794	0.0022542
ENSMUSG00000042918	Mamstr	-6.77488	-2.55156	-3.92722	0.00609973	0.019162
ENSMUSG00000003746	Man1a	-2.33704	8.64826	-14.3106	2.63122e-06	6.5041e-05
ENSMUSG00000037306	Man1c1	3.46014	5.05912	14.0367	2.98739e-06	7.08643e-05
ENSMUSG00000038886	Man2a2	1.42412	6.99439	14.9866	1.94211e-06	5.47429e-05
ENSMUSG00000029119	Man2b2	0.669768	6.59409	7.97409	0.000111785	0.000908904
ENSMUSG00000028164	Manba	0.6573	6.03972	7.36972	0.000181402	0.00133021
ENSMUSG00000032575	Manf	1.04663	6.48488	9.67459	3.3224e-05	0.000370276
ENSMUSG00000025037	Maoa	4.16487	-0.298661	4.53557	0.00292615	0.0109682
ENSMUSG00000020623	Map2k6	-1.66611	4.1036	-9.70253	3.26201e-05	0.000365119
ENSMUSG00000004054	Map3k11	0.739788	7.27307	10.6805	1.76517e-05	0.00023526
ENSMUSG00000031303	Map3k15	2.61442	2.82784	8.545	7.27081e-05	0.000662417
ENSMUSG00000014426	Map3k4	1.23525	4.97178	8.17014	9.61623e-05	0.00081095
ENSMUSG00000028862	Map3k6	2.66821	1.77943	6.46123	0.000400189	0.00237541
ENSMUSG00000024235	Map3k8	0.628271	5.79827	4.37611	0.00352852	0.0126397
ENSMUSG00000024948	Map4k2	-0.723649	7.01262	-9.76995	3.1214e-05	0.000354912
ENSMUSG00000024242	Map4k3	0.609855	4.78474	4.82822	0.00209545	0.0085296
ENSMUSG00000026074	Map4k4	1.5308	7.01756	12.9926	4.95573e-06	9.75155e-05
ENSMUSG00000019996	Map7	-2.11837	2.69251	-6.94805	0.000259267	0.00171905
ENSMUSG00000053137	Mapk11	-5.0548	3.33993	-21.835	1.59661e-07	1.2586e-05
ENSMUSG00000022610	Mapk12	-5.51727	-0.635718	-4.74876	0.00229153	0.00911537
ENSMUSG00000053436	Mapk14	-0.627267	9.34419	-8.00457	0.000109177	0.000893318
ENSMUSG00000063065	Mapk3	0.736422	6.72704	7.8508	0.00012308	0.000979792
ENSMUSG00000042688	Mapk6	0.637219	5.66572	5.40329	0.00112568	0.00530155
ENSMUSG00000001034	Mapk7	-0.66082	6.34543	-6.41752	0.000416597	0.00244393
ENSMUSG00000027223	Mapk8ip1	-4.33827	0.327897	-5.50923	0.00100875	0.00485046
ENSMUSG00000016528	Mapkapk2	0.770932	8.54532	11.2569	1.2581e-05	0.000181526
ENSMUSG00000032577	Mapkapk3	1.07039	6.65506	12.6242	5.97892e-06	0.000110169
ENSMUSG00000027479	Mapre1	-0.841907	8.03375	-12.9439	5.07871e-06	9.86073e-05
ENSMUSG00000024277	Mapre2	0.867683	6.51439	8.40019	8.08992e-05	0.000714016
ENSMUSG00000025702	March8	4.0195	2.96334	11.1037	1.37439e-05	0.000193132
ENSMUSG00000044345	Marveld1	-1.8296	8.12235	-19.9324	2.93304e-07	1.78753e-05
ENSMUSG00000021636	Marveld2	-4.19046	0.496141	-4.42659	0.00332418	0.0121056
ENSMUSG00000034751	Mast4	-1.46679	3.2582	-5.12631	0.00150995	0.00666689
ENSMUSG00000040533	Matn1	-3.30334	0.43656	-4.33169	0.0037199	0.0131576
ENSMUSG00000037523	Mavs	0.968914	5.42516	7.6555	0.000143724	0.00110533
ENSMUSG00000032344	Mb21d1	0.626792	5.30376	4.42248	0.0033403	0.0121483
ENSMUSG00000021028	Mbip	-0.918597	4.00605	-5.00157	0.0017293	0.0073881
ENSMUSG00000049285	Mblac1	1.27741	2.14721	3.2239	0.0152815	0.0394859
ENSMUSG00000022139	Mbnl2	1.31503	6.42545	16.5901	9.92564e-07	3.70863e-05
ENSMUSG00000036109	Mbnl3	-1.39667	4.1281	-8.4744	7.65775e-05	0.000683697
ENSMUSG00000071856	Mcc	-1.6834	1.38026	-3.52567	0.0102128	0.0286898
ENSMUSG00000033429	Mcee	1.30935	2.32463	4.15991	0.00457555	0.0154204
ENSMUSG00000031442	Mcf2l	5.38551	-0.190649	4.2632	0.00403783	0.014025
ENSMUSG00000024150	Mcfd2	0.987225	5.98238	9.2984	4.27273e-05	0.00044155
ENSMUSG00000011008	Mcoln2	2.61	0.686971	3.96664	0.00580637	0.018463
ENSMUSG00000032776	Mctp2	4.91057	-1.51508	3.0345	0.0198074	0.0483789
ENSMUSG00000019179	Mdh2	-2.93394	8.9159	-46.7012	9.65206e-10	1.41317e-06
ENSMUSG00000027239	Mdk	-5.48351	-0.0950502	-4.74562	0.0022997	0.00914505
ENSMUSG00000018160	Med1	-0.589477	6.87063	-8.09556	0.000101793	0.000845205
ENSMUSG00000038622	Med30	-1.28948	5.08059	-11.3366	1.20202e-05	0.000175788
ENSMUSG00000030557	Mef2a	1.06967	7.45731	15.8411	1.34717e-06	4.44403e-05
ENSMUSG00000005583	Mef2c	-0.593174	7.10072	-6.81933	0.00029012	0.00186322
ENSMUSG00000022534	Mefv	-0.951067	7.66691	-12.8436	5.34335e-06	0.000102339
ENSMUSG00000039270	Megf9	1.16502	4.2816	6.22248	0.000499679	0.00282707
ENSMUSG00000020160	Meis1	-1.56262	3.06193	-5.48402	0.00103528	0.00495159
ENSMUSG00000041420	Meis3	-2.45283	2.57342	-5.1066	0.00154245	0.00678026
ENSMUSG00000035683	Melk	-1.21338	3.74135	-6.333	0.000450521	0.00260713
ENSMUSG00000014361	Mertk	2.78021	4.40137	5.60449	0.00091513	0.00450011
ENSMUSG00000070462	Mesdc1	1.47312	5.10302	11.4953	1.09865e-05	0.000165155
ENSMUSG00000009376	Met	4.55896	2.72324	16.9286	8.68296e-07	3.43282e-05
ENSMUSG00000039208	Metrnl	2.51113	5.59926	16.3846	1.07788e-06	3.90332e-05
ENSMUSG00000057234	Mettl15	-1.67424	2.24403	-4.61851	0.00265862	0.0102081
[truncated: 1,698 more rows]
